# Supplementary material for: Shotgun sequencing of the vaginal microbiome reveals both a species and functional potential signature of preterm birth
Source: PubMed Central journal article supplement (PMC7665020; doi:10.1038/s41522-020-00162-8), 2020-11-12
Supplement: 41522_2020_162_MOESM1_ESM.pdf [file 41522_2020_162_MOESM1_ESM.pdf]

Supplementary Table 1 | Determination of associations between risk groups and microbiota

|       | no-<br>risk_FT B | risk_FT B | risk_PT B | FT B/PT B |
|-------|------------------|-----------|-----------|-----------|
| CST-1 | 0.08             | 0.76      | 0.08      | 0.09      |
| CST-2 | 0.42             | 0.23      | 0.32      | 1         |
| CST-3 | 1                | 1         | 1         | 1         |
| CST-4 | 0.31             | 0.64      | 0.02*     | 0.02*     |
| CST-5 | 1                | 0.30      | 0.09      | 0.12      |
| CST-8 | 1                | 0.62      | 1         | 1         |

\*Asterisk highlights significant associations as determined by Fishers exact test using fisher.test function in R

Supplementary Table 2 | Full MaAsLiN2 output for significant associations of species and sample groupings

| metadata      | feature                       | value       | coef     | stderr   | N  | N.no | pval     | qval     |
|---------------|-------------------------------|-------------|----------|----------|----|------|----------|----------|
| Outcome_group | Alloscardovia.omnicolens      | no-risk_PTB | 0.569544 | 0.049605 | 49 | 0    | 1.11E-14 | 5.33E-11 |
| Outcome_group | Clostridium_K.cellulovorans   | no-risk_PTB | 0.37881  | 0.050281 | 49 | 0    | 2.19E-09 | 5.27E-06 |
| LLETZ         | Paracoccus.sp000967825        | Yes         | 0.399805 | 0.065555 | 49 | 0    | 2.63E-07 | 0.000422 |
| Previous_PTB  | Paracoccus.sp000967825        | Yes         | 0.381937 | 0.068191 | 49 | 0    | 1.39E-06 | 0.00067  |
| Risk_group    | Paracoccus.sp000967825        | Risk        | -0.36568 | 0.073786 | 49 | 0    | 1.17E-05 | 0.00067  |
| LLETZ         | X2.01.FULL.66.17.sp001803875  | Yes         | 0.106814 | 0.022004 | 49 | 0    | 1.63E-05 | 0.00067  |
| LLETZ         | Achromobacter.sp001299435     | Yes         | 0.106814 | 0.022004 | 49 | 0    | 1.63E-05 | 0.00067  |
| LLETZ         | Agrobacterium.sp900013535     | Yes         | 0.106814 | 0.022004 | 49 | 0    | 1.63E-05 | 0.00067  |
| LLETZ         | Akkermansia.glycaniphila      | Yes         | 0.106814 | 0.022004 | 49 | 0    | 1.63E-05 | 0.00067  |
| LLETZ         | Aliarcobacter.cryaerophilus_A | Yes         | 0.106814 | 0.022004 | 49 | 0    | 1.63E-05 | 0.00067  |

|                  |                                     |      |                  |              |    |   |              |             |
|------------------|-------------------------------------|------|------------------|--------------|----|---|--------------|-------------|
| LLETZ            | <i>Alistipes.onderdonkii</i>        | Yes  | 0.106<br>814     | 0.022<br>004 | 49 | 0 | 1.63E<br>-05 | 0.000<br>67 |
| LLETZ            | <i>Alistipes.senegalensis</i>       | Yes  | 0.106<br>814     | 0.022<br>004 | 49 | 0 | 1.63E<br>-05 | 0.000<br>67 |
| LLETZ            | <i>Alistipes_A.indistinctus</i>     | Yes  | 0.106<br>814     | 0.022<br>004 | 49 | 0 | 1.63E<br>-05 | 0.000<br>67 |
| LLETZ            | <i>ASF356.sp000364165</i>           | Yes  | 0.106<br>814     | 0.022<br>004 | 49 | 0 | 1.63E<br>-05 | 0.000<br>67 |
| LLETZ            | <i>Bact.08.sp000473305</i>          | Yes  | 0.106<br>814     | 0.022<br>004 | 49 | 0 | 1.63E<br>-05 | 0.000<br>67 |
| LLETZ            | <i>Bacteroides_A.plebeius</i>       | Yes  | 0.106<br>814     | 0.022<br>004 | 49 | 0 | 1.63E<br>-05 | 0.000<br>67 |
| LLETZ            | <i>Baumannia.cicadellinica_C</i>    | Yes  | 0.106<br>814     | 0.022<br>004 | 49 | 0 | 1.63E<br>-05 | 0.000<br>67 |
| Previous_<br>PTB | <i>Bifidobacterium.callitrichos</i> | Yes  | -<br>0.113<br>09 | 0.022<br>683 | 49 | 0 | 1.06E<br>-05 | 0.000<br>67 |
| Risk_grou<br>p   | <i>Bifidobacterium.callitrichos</i> | Risk | 0.119<br>702     | 0.024<br>544 | 49 | 0 | 1.51E<br>-05 | 0.000<br>67 |
| Previous_<br>PTB | <i>Bifidobacterium.gallinarum</i>   | Yes  | -<br>0.113<br>09 | 0.022<br>683 | 49 | 0 | 1.06E<br>-05 | 0.000<br>67 |
| Risk_grou<br>p   | <i>Bifidobacterium.gallinarum</i>   | Risk | 0.119<br>702     | 0.024<br>544 | 49 | 0 | 1.51E<br>-05 | 0.000<br>67 |
| Previous_<br>PTB | <i>Bifidobacterium.sp002451435</i>  | Yes  | -<br>0.113<br>09 | 0.022<br>683 | 49 | 0 | 1.06E<br>-05 | 0.000<br>67 |

|              |                              |      |          |          |    |   |          |         |
|--------------|------------------------------|------|----------|----------|----|---|----------|---------|
| Risk_group   | Bifidobacterium.sp002451435  | Risk | 0.119702 | 0.024544 | 49 | 0 | 1.51E-05 | 0.00067 |
| LLETZ        | Blastococcus.sp003075095     | Yes  | 0.106814 | 0.022004 | 49 | 0 | 1.63E-05 | 0.00067 |
| LLETZ        | Blautia_A.sp000285855        | Yes  | 0.106814 | 0.022004 | 49 | 0 | 1.63E-05 | 0.00067 |
| LLETZ        | Brevundimonas.sp002157625    | Yes  | 0.106814 | 0.022004 | 49 | 0 | 1.63E-05 | 0.00067 |
| LLETZ        | Brevundimonas.sp002484265    | Yes  | 0.106814 | 0.022004 | 49 | 0 | 1.63E-05 | 0.00067 |
| LLETZ        | Butyricicoccus.pullicaecorum | Yes  | 0.106814 | 0.022004 | 49 | 0 | 1.63E-05 | 0.00067 |
| LLETZ        | Butyricimonas.sp002161485    | Yes  | 0.106814 | 0.022004 | 49 | 0 | 1.63E-05 | 0.00067 |
| LLETZ        | Butyrivibrio_A.crossotus     | Yes  | 0.106814 | 0.022004 | 49 | 0 | 1.63E-05 | 0.00067 |
| LLETZ        | CAG.110.sp002437585          | Yes  | 0.106814 | 0.022004 | 49 | 0 | 1.63E-05 | 0.00067 |
| LLETZ        | CAG.194.sp000432915          | Yes  | 0.106814 | 0.022004 | 49 | 0 | 1.63E-05 | 0.00067 |
| LLETZ        | CAG.302.sp002375205          | Yes  | 0.106814 | 0.022004 | 49 | 0 | 1.63E-05 | 0.00067 |
| Previous_PTB | CAG.590.sp003530125          | Yes  | -0.16936 | 0.034292 | 49 | 0 | 1.24E-05 | 0.00067 |
| LLETZ        | CAG.83.sp000435555           | Yes  | 0.106814 | 0.022004 | 49 | 0 | 1.63E-05 | 0.00067 |

|              |                                 |      |                  |              |    |   |              |             |
|--------------|---------------------------------|------|------------------|--------------|----|---|--------------|-------------|
| LLETZ        | CAG.83.sp001916855              | Yes  | 0.106<br>814     | 0.022<br>004 | 49 | 0 | 1.63E<br>-05 | 0.000<br>67 |
| LLETZ        | Campylobacter_D.jejuni          | Yes  | 0.106<br>814     | 0.022<br>004 | 49 | 0 | 1.63E<br>-05 | 0.000<br>67 |
| LLETZ        | Clostridium.taeniosporum        | Yes  | 0.106<br>814     | 0.022<br>004 | 49 | 0 | 1.63E<br>-05 | 0.000<br>67 |
| LLETZ        | Clostridium_AN.bornimense       | Yes  | 0.106<br>814     | 0.022<br>004 | 49 | 0 | 1.63E<br>-05 | 0.000<br>67 |
| Previous_PTB | Clostridium_M.clostridioforme   | Yes  | -<br>0.113<br>09 | 0.022<br>683 | 49 | 0 | 1.06E<br>-05 | 0.000<br>67 |
| Risk_group   | Clostridium_M.clostridioforme   | Risk | 0.119<br>702     | 0.024<br>544 | 49 | 0 | 1.51E<br>-05 | 0.000<br>67 |
| LLETZ        | Clostridium_Q.sp003024715       | Yes  | 0.106<br>814     | 0.022<br>004 | 49 | 0 | 1.63E<br>-05 | 0.000<br>67 |
| LLETZ        | Corynebacterium.appendicis      | Yes  | 0.106<br>814     | 0.022<br>004 | 49 | 0 | 1.63E<br>-05 | 0.000<br>67 |
| Previous_PTB | Corynebacterium.coyleae         | Yes  | -<br>0.113<br>09 | 0.022<br>683 | 49 | 0 | 1.06E<br>-05 | 0.000<br>67 |
| Risk_group   | Corynebacterium.coyleae         | Risk | 0.119<br>702     | 0.024<br>544 | 49 | 0 | 1.51E<br>-05 | 0.000<br>67 |
| LLETZ        | Corynebacterium.kefirresidentii | Yes  | 0.106<br>814     | 0.022<br>004 | 49 | 0 | 1.63E<br>-05 | 0.000<br>67 |
| LLETZ        | Corynebacterium.otitidis        | Yes  | 0.106<br>814     | 0.022<br>004 | 49 | 0 | 1.63E<br>-05 | 0.000<br>67 |
| LLETZ        | Cupriavidus.gilardii            | Yes  | 0.106            | 0.022        | 49 | 0 | 1.63E        | 0.000       |

|                  |                                        |      |                  |              |    |   |              |             |
|------------------|----------------------------------------|------|------------------|--------------|----|---|--------------|-------------|
|                  |                                        |      | 814              | 004          |    |   | -05          | 67          |
| LLETZ            | Dorea.formicigenerans                  | Yes  | 0.106<br>814     | 0.022<br>004 | 49 | 0 | 1.63E<br>-05 | 0.000<br>67 |
| LLETZ            | Dorea.sp900066555                      | Yes  | 0.106<br>814     | 0.022<br>004 | 49 | 0 | 1.63E<br>-05 | 0.000<br>67 |
| LLETZ            | DTU078.sp002385415                     | Yes  | 0.106<br>814     | 0.022<br>004 | 49 | 0 | 1.63E<br>-05 | 0.000<br>67 |
| LLETZ            | Erysipelatoclostridium.s<br>piroforme  | Yes  | 0.106<br>814     | 0.022<br>004 | 49 | 0 | 1.63E<br>-05 | 0.000<br>67 |
| LLETZ            | Eubacterium_E.hallii_A                 | Yes  | 0.106<br>814     | 0.022<br>004 | 49 | 0 | 1.63E<br>-05 | 0.000<br>67 |
| LLETZ            | Eubacterium_H.cellulos<br>olvens       | Yes  | 0.106<br>814     | 0.022<br>004 | 49 | 0 | 1.63E<br>-05 | 0.000<br>67 |
| LLETZ            | Eubacterium_S.uniform<br>e             | Yes  | 0.106<br>814     | 0.022<br>004 | 49 | 0 | 1.63E<br>-05 | 0.000<br>67 |
| LLETZ            | Faecalibacterium.prausn<br>itzii_C     | Yes  | 0.106<br>814     | 0.022<br>004 | 49 | 0 | 1.63E<br>-05 | 0.000<br>67 |
| LLETZ            | Faecalibacterium.prausn<br>itzii_D     | Yes  | 0.106<br>814     | 0.022<br>004 | 49 | 0 | 1.63E<br>-05 | 0.000<br>67 |
| Previous_<br>PTB | Faecalicatena.glycyrrhiz<br>inilyticum | Yes  | -<br>0.113<br>09 | 0.022<br>683 | 49 | 0 | 1.06E<br>-05 | 0.000<br>67 |
| Risk_grou<br>p   | Faecalicatena.glycyrrhiz<br>inilyticum | Risk | 0.119<br>702     | 0.024<br>544 | 49 | 0 | 1.51E<br>-05 | 0.000<br>67 |
| Previous_<br>PTB | Faecalicatena.sp000403<br>295          | Yes  | -<br>0.113<br>09 | 0.022<br>683 | 49 | 0 | 1.06E<br>-05 | 0.000<br>67 |

|                  |                                |                 |                  |              |    |   |              |             |
|------------------|--------------------------------|-----------------|------------------|--------------|----|---|--------------|-------------|
| Risk_group       | Faecalicatena.sp000403<br>295  | Risk            | 0.119<br>702     | 0.024<br>544 | 49 | 0 | 1.51E<br>-05 | 0.000<br>67 |
| LLETZ            | Fastidiosipila.sanguinis       | Yes             | 0.106<br>814     | 0.022<br>004 | 49 | 0 | 1.63E<br>-05 | 0.000<br>67 |
| LLETZ            | Flavonifractor.sp00216<br>1085 | Yes             | 0.106<br>814     | 0.022<br>004 | 49 | 0 | 1.63E<br>-05 | 0.000<br>67 |
| LLETZ            | GCA.900066575.sp900<br>066385  | Yes             | 0.106<br>814     | 0.022<br>004 | 49 | 0 | 1.63E<br>-05 | 0.000<br>67 |
| LLETZ            | Gordonia.jacobaea              | Yes             | 0.106<br>814     | 0.022<br>004 | 49 | 0 | 1.63E<br>-05 | 0.000<br>67 |
| LLETZ            | GWC2.39.14.sp000996<br>245     | Yes             | 0.106<br>814     | 0.022<br>004 | 49 | 0 | 1.63E<br>-05 | 0.000<br>67 |
| LLETZ            | Hungatella.effluvii            | Yes             | 0.106<br>814     | 0.022<br>004 | 49 | 0 | 1.63E<br>-05 | 0.000<br>67 |
| LLETZ            | Ileibacterium.valens           | Yes             | 0.106<br>814     | 0.022<br>004 | 49 | 0 | 1.63E<br>-05 | 0.000<br>67 |
| LLETZ            | KLE1615.sp900066985            | Yes             | 0.106<br>814     | 0.022<br>004 | 49 | 0 | 1.63E<br>-05 | 0.000<br>67 |
| Previous_PT<br>B | Lachnospira.eligens_B          | Yes             | -<br>0.113<br>09 | 0.022<br>683 | 49 | 0 | 1.06E<br>-05 | 0.000<br>67 |
| Risk_group       | Lachnospira.eligens_B          | Risk            | 0.119<br>702     | 0.024<br>544 | 49 | 0 | 1.51E<br>-05 | 0.000<br>67 |
| Outcome_group    | Lactobacillus.intestinalis     | no-risk_P<br>TB | 1.734<br>946     | 0.336<br>891 | 49 | 0 | 6.19E<br>-06 | 0.000<br>67 |
| LLETZ            | Lysinibacillus.fusiformi       | Yes             | 0.106            | 0.022        | 49 | 0 | 1.63E        | 0.000       |

|                  |                                    |     |              |              |    |   |              |             |
|------------------|------------------------------------|-----|--------------|--------------|----|---|--------------|-------------|
|                  | s_D                                |     | 814          | 004          |    |   | -05          | 67          |
| LLETZ            | Marvinbryantia.sp9000<br>66075     | Yes | 0.106<br>814 | 0.022<br>004 | 49 | 0 | 1.63E<br>-05 | 0.000<br>67 |
| LLETZ            | Methylobacterium.orga<br>nophilum  | Yes | 0.106<br>814 | 0.022<br>004 | 49 | 0 | 1.63E<br>-05 | 0.000<br>67 |
| LLETZ            | Micromonospora.sp003<br>176735     | Yes | 0.106<br>814 | 0.022<br>004 | 49 | 0 | 1.63E<br>-05 | 0.000<br>67 |
| LLETZ            | Negativibacillus.massili<br>ensis  | Yes | 0.106<br>814 | 0.022<br>004 | 49 | 0 | 1.63E<br>-05 | 0.000<br>67 |
| LLETZ            | OEMS01.sp900199405                 | Yes | 0.106<br>814 | 0.022<br>004 | 49 | 0 | 1.63E<br>-05 | 0.000<br>67 |
| LLETZ            | Oxalobacter.formigenes<br>_B       | Yes | 0.106<br>814 | 0.022<br>004 | 49 | 0 | 1.63E<br>-05 | 0.000<br>67 |
| LLETZ            | Paludibacter_A.jiangxie<br>nsis    | Yes | 0.106<br>814 | 0.022<br>004 | 49 | 0 | 1.63E<br>-05 | 0.000<br>67 |
| LLETZ            | Parabacteroides.timonen<br>sis     | Yes | 0.106<br>814 | 0.022<br>004 | 49 | 0 | 1.63E<br>-05 | 0.000<br>67 |
| LLETZ            | Parasporobacterium.pau<br>civorans | Yes | 0.106<br>814 | 0.022<br>004 | 49 | 0 | 1.63E<br>-05 | 0.000<br>67 |
| LLETZ            | PeH17.sp000435055                  | Yes | 0.430<br>891 | 0.081<br>758 | 49 | 0 | 4.16E<br>-06 | 0.000<br>67 |
| Previous_<br>PTB | PeH17.sp000435055                  | Yes | 0.413<br>2   | 0.085<br>046 | 49 | 0 | 1.61E<br>-05 | 0.000<br>67 |
| Delivery         | Prevotella.bivia                   | PTB | 0.776<br>951 | 0.153<br>928 | 49 | 0 | 8.66E<br>-06 | 0.000<br>67 |
| LLETZ            | Prevotella.sp002251365             | Yes | 0.106<br>814 | 0.022<br>004 | 49 | 0 | 1.63E<br>-05 | 0.000<br>67 |



|                  |                                        |     |              |              |    |   |              |             |
|------------------|----------------------------------------|-----|--------------|--------------|----|---|--------------|-------------|
| LLETZ            | <i>Pseudomonas_E.hunane nsis</i>       | Yes | 0.106<br>814 | 0.022<br>004 | 49 | 0 | 1.63E<br>-05 | 0.000<br>67 |
| LLETZ            | QAMH01.sp003149935                     | Yes | 0.219<br>881 | 0.038<br>891 | 49 | 0 | 1.16E<br>-06 | 0.000<br>67 |
| Previous_<br>PTB | QAMH01.sp003149935                     | Yes | 0.222<br>808 | 0.040<br>455 | 49 | 0 | 1.89E<br>-06 | 0.000<br>67 |
| LLETZ            | <i>Ralstonia.pickettii</i>             | Yes | 0.106<br>814 | 0.022<br>004 | 49 | 0 | 1.63E<br>-05 | 0.000<br>67 |
| LLETZ            | <i>Ralstonia.pseudosolana cearum</i>   | Yes | 0.106<br>814 | 0.022<br>004 | 49 | 0 | 1.63E<br>-05 | 0.000<br>67 |
| LLETZ            | RC9.sp000434935                        | Yes | 0.106<br>814 | 0.022<br>004 | 49 | 0 | 1.63E<br>-05 | 0.000<br>67 |
| LLETZ            | <i>Rubellimicrobium.ther mophilum</i>  | Yes | 0.106<br>814 | 0.022<br>004 | 49 | 0 | 1.63E<br>-05 | 0.000<br>67 |
| LLETZ            | RUG210.sp003265305                     | Yes | 0.106<br>814 | 0.022<br>004 | 49 | 0 | 1.63E<br>-05 | 0.000<br>67 |
| LLETZ            | RUG350.sp900315995                     | Yes | 0.106<br>814 | 0.022<br>004 | 49 | 0 | 1.63E<br>-05 | 0.000<br>67 |
| LLETZ            | <i>Ruminococcus_F.cham panellensis</i> | Yes | 0.106<br>814 | 0.022<br>004 | 49 | 0 | 1.63E<br>-05 | 0.000<br>67 |
| LLETZ            | <i>Soleaferrea.massiliensis</i>        | Yes | 0.106<br>814 | 0.022<br>004 | 49 | 0 | 1.63E<br>-05 | 0.000<br>67 |
| LLETZ            | <i>Sporobacter.termitidis</i>          | Yes | 0.106<br>814 | 0.022<br>004 | 49 | 0 | 1.63E<br>-05 | 0.000<br>67 |
| LLETZ            | <i>Stenotrophomonas.malt ophilia</i>   | Yes | 0.106<br>814 | 0.022<br>004 | 49 | 0 | 1.63E<br>-05 | 0.000<br>67 |

|             |                               |      |                  |              |    |   |              |             |
|-------------|-------------------------------|------|------------------|--------------|----|---|--------------|-------------|
| LLETZ       | Stenotrophomonas.rhizophila_A | Yes  | 0.106<br>814     | 0.022<br>004 | 49 | 0 | 1.63E<br>-05 | 0.000<br>67 |
| LLETZ       | Streptococcus.thermophilus    | Yes  | 0.106<br>814     | 0.022<br>004 | 49 | 0 | 1.63E<br>-05 | 0.000<br>67 |
| LLETZ       | Streptomyces.papulosa         | Yes  | 0.106<br>814     | 0.022<br>004 | 49 | 0 | 1.63E<br>-05 | 0.000<br>67 |
| LLETZ       | Sutterella.wadsworthensis_B   | Yes  | 0.106<br>814     | 0.022<br>004 | 49 | 0 | 1.63E<br>-05 | 0.000<br>67 |
| LLETZ       | SZUA.51.sp003232965           | Yes  | 0.106<br>814     | 0.022<br>004 | 49 | 0 | 1.63E<br>-05 | 0.000<br>67 |
| LLETZ       | Tepidanaerobacter.synrophicus | Yes  | 0.106<br>814     | 0.022<br>004 | 49 | 0 | 1.63E<br>-05 | 0.000<br>67 |
| LLETZ       | TF01.11.sp003524945           | Yes  | 0.106<br>814     | 0.022<br>004 | 49 | 0 | 1.63E<br>-05 | 0.000<br>67 |
| LLETZ       | Tidjanibacter.inops           | Yes  | 0.106<br>814     | 0.022<br>004 | 49 | 0 | 1.63E<br>-05 | 0.000<br>67 |
| Previous_PT | Tyzzereilla.nexilis           | Yes  | -<br>0.113<br>09 | 0.022<br>683 | 49 | 0 | 1.06E<br>-05 | 0.000<br>67 |
| Risk_group  | Tyzzereilla.nexilis           | Risk | 0.119<br>702     | 0.024<br>544 | 49 | 0 | 1.51E<br>-05 | 0.000<br>67 |
| LLETZ       | UBA11774.sp003507655          | Yes  | 0.106<br>814     | 0.022<br>004 | 49 | 0 | 1.63E<br>-05 | 0.000<br>67 |
| LLETZ       | UBA1191.sp900066305           | Yes  | 0.106<br>814     | 0.022<br>004 | 49 | 0 | 1.63E<br>-05 | 0.000<br>67 |
| LLETZ       | UBA1259.sp900320065           | Yes  | 0.106<br>814     | 0.022<br>004 | 49 | 0 | 1.63E<br>-05 | 0.000<br>67 |

|                  |                                   |     |              |              |    |   |              |              |
|------------------|-----------------------------------|-----|--------------|--------------|----|---|--------------|--------------|
| LLETZ            | UBA3566.sp002376065               | Yes | 0.106<br>814 | 0.022<br>004 | 49 | 0 | 1.63E<br>-05 | 0.000<br>67  |
| LLETZ            | UBA7524.sp002478275               | Yes | 0.106<br>814 | 0.022<br>004 | 49 | 0 | 1.63E<br>-05 | 0.000<br>67  |
| LLETZ            | UBA9655.sp001767835               | Yes | 0.106<br>814 | 0.022<br>004 | 49 | 0 | 1.63E<br>-05 | 0.000<br>67  |
| LLETZ            | Veillonella.rogosae               | Yes | 0.106<br>814 | 0.022<br>004 | 49 | 0 | 1.63E<br>-05 | 0.000<br>67  |
| LLETZ            | W11650.sp002999035                | Yes | 0.106<br>814 | 0.022<br>004 | 49 | 0 | 1.63E<br>-05 | 0.000<br>67  |
| LLETZ            | Mycolicibacterium.sp00<br>1665685 | Yes | 0.602<br>987 | 0.127<br>271 | 49 | 0 | 2.38E<br>-05 | 0.000<br>97  |
| Previous_<br>PTB | X2.01.FULL.66.17.sp0<br>01803875  | Yes | 0.103<br>18  | 0.022<br>889 | 49 | 0 | 4.98E<br>-05 | 0.001<br>105 |
| Previous_<br>PTB | Achromobacter.sp0012<br>99435     | Yes | 0.103<br>18  | 0.022<br>889 | 49 | 0 | 4.98E<br>-05 | 0.001<br>105 |
| Previous_<br>PTB | Agrobacterium.sp90001<br>3535     | Yes | 0.103<br>18  | 0.022<br>889 | 49 | 0 | 4.98E<br>-05 | 0.001<br>105 |
| Previous_<br>PTB | Akkermansia.glycaniphila          | Yes | 0.103<br>18  | 0.022<br>889 | 49 | 0 | 4.98E<br>-05 | 0.001<br>105 |
| Previous_<br>PTB | Aliarcobacter.cryaerophilus_A     | Yes | 0.103<br>18  | 0.022<br>889 | 49 | 0 | 4.98E<br>-05 | 0.001<br>105 |
| Previous_<br>PTB | Alistipes.onderdonkii             | Yes | 0.103<br>18  | 0.022<br>889 | 49 | 0 | 4.98E<br>-05 | 0.001<br>105 |
| LLETZ            | Alistipes.putredinis              | Yes | 0.361<br>541 | 0.079<br>416 | 49 | 0 | 4.32E<br>-05 | 0.001<br>105 |

|                  |                                          |     |                  |              |    |   |              |              |
|------------------|------------------------------------------|-----|------------------|--------------|----|---|--------------|--------------|
| Previous_<br>PTB | <i>Alistipes.senegalensis</i>            | Yes | 0.103<br>18      | 0.022<br>889 | 49 | 0 | 4.98E<br>-05 | 0.001<br>105 |
| Previous_<br>PTB | <i>Alistipes_A.indistinctus</i>          | Yes | 0.103<br>18      | 0.022<br>889 | 49 | 0 | 4.98E<br>-05 | 0.001<br>105 |
| Previous_<br>PTB | <i>ASF356.sp000364165</i>                | Yes | 0.103<br>18      | 0.022<br>889 | 49 | 0 | 4.98E<br>-05 | 0.001<br>105 |
| Previous_<br>PTB | <i>Bact.08.sp000473305</i>               | Yes | 0.103<br>18      | 0.022<br>889 | 49 | 0 | 4.98E<br>-05 | 0.001<br>105 |
| Previous_<br>PTB | <i>Bacteroides_A.plebeius</i>            | Yes | 0.103<br>18      | 0.022<br>889 | 49 | 0 | 4.98E<br>-05 | 0.001<br>105 |
| Previous_<br>PTB | <i>Baumannia.cicadellinic<br/>ola_C</i>  | Yes | 0.103<br>18      | 0.022<br>889 | 49 | 0 | 4.98E<br>-05 | 0.001<br>105 |
| LLETZ            | <i>Bifidobacterium.callitric<br/>hos</i> | Yes | -<br>0.100<br>21 | 0.021<br>806 | 49 | 0 | 3.76E<br>-05 | 0.001<br>105 |
| LLETZ            | <i>Bifidobacterium.gallinar<br/>um</i>   | Yes | -<br>0.100<br>21 | 0.021<br>806 | 49 | 0 | 3.76E<br>-05 | 0.001<br>105 |
| LLETZ            | <i>Bifidobacterium.sp0024<br/>51435</i>  | Yes | -<br>0.100<br>21 | 0.021<br>806 | 49 | 0 | 3.76E<br>-05 | 0.001<br>105 |
| Previous_<br>PTB | <i>Blastococcus.sp003075<br/>095</i>     | Yes | 0.103<br>18      | 0.022<br>889 | 49 | 0 | 4.98E<br>-05 | 0.001<br>105 |
| Previous_<br>PTB | <i>Blautia_A.sp000285855</i>             | Yes | 0.103<br>18      | 0.022<br>889 | 49 | 0 | 4.98E<br>-05 | 0.001<br>105 |
| Previous_<br>PTB | <i>Brevundimonas.sp0021<br/>57625</i>    | Yes | 0.103<br>18      | 0.022<br>889 | 49 | 0 | 4.98E<br>-05 | 0.001<br>105 |

|                  |                                   |     |                  |              |    |   |              |              |
|------------------|-----------------------------------|-----|------------------|--------------|----|---|--------------|--------------|
| Previous_<br>PTB | Brevundimonas.sp0024<br>84265     | Yes | 0.103<br>18      | 0.022<br>889 | 49 | 0 | 4.98E<br>-05 | 0.001<br>105 |
| Previous_<br>PTB | Butyricoccus.pullicaec<br>orum    | Yes | 0.103<br>18      | 0.022<br>889 | 49 | 0 | 4.98E<br>-05 | 0.001<br>105 |
| Previous_<br>PTB | Butyricimonas.sp00216<br>1485     | Yes | 0.103<br>18      | 0.022<br>889 | 49 | 0 | 4.98E<br>-05 | 0.001<br>105 |
| Previous_<br>PTB | Butyrivibrio_A.crossotu<br>s      | Yes | 0.103<br>18      | 0.022<br>889 | 49 | 0 | 4.98E<br>-05 | 0.001<br>105 |
| Previous_<br>PTB | CAG.110.sp002437585               | Yes | 0.103<br>18      | 0.022<br>889 | 49 | 0 | 4.98E<br>-05 | 0.001<br>105 |
| Previous_<br>PTB | CAG.194.sp000432915               | Yes | 0.103<br>18      | 0.022<br>889 | 49 | 0 | 4.98E<br>-05 | 0.001<br>105 |
| Previous_<br>PTB | CAG.302.sp002375205               | Yes | 0.103<br>18      | 0.022<br>889 | 49 | 0 | 4.98E<br>-05 | 0.001<br>105 |
| Previous_<br>PTB | CAG.83.sp000435555                | Yes | 0.103<br>18      | 0.022<br>889 | 49 | 0 | 4.98E<br>-05 | 0.001<br>105 |
| Previous_<br>PTB | CAG.83.sp001916855                | Yes | 0.103<br>18      | 0.022<br>889 | 49 | 0 | 4.98E<br>-05 | 0.001<br>105 |
| Previous_<br>PTB | Campylobacter_D.jejun<br>i        | Yes | 0.103<br>18      | 0.022<br>889 | 49 | 0 | 4.98E<br>-05 | 0.001<br>105 |
| Previous_<br>PTB | Clostridium.taeniosporu<br>m      | Yes | 0.103<br>18      | 0.022<br>889 | 49 | 0 | 4.98E<br>-05 | 0.001<br>105 |
| Previous_<br>PTB | Clostridium_AN.borni<br>mense     | Yes | 0.103<br>18      | 0.022<br>889 | 49 | 0 | 4.98E<br>-05 | 0.001<br>105 |
| LLETZ            | Clostridium_M.clostridi<br>oforme | Yes | -<br>0.100<br>21 | 0.021<br>806 | 49 | 0 | 3.76E<br>-05 | 0.001<br>105 |

|                  |                                       |     |                  |              |    |   |              |              |
|------------------|---------------------------------------|-----|------------------|--------------|----|---|--------------|--------------|
| Previous_<br>PTB | Clostridium_Q.sp00302<br>4715         | Yes | 0.103<br>18      | 0.022<br>889 | 49 | 0 | 4.98E<br>-05 | 0.001<br>105 |
| Previous_<br>PTB | Corynebacterium.appen<br>dicis        | Yes | 0.103<br>18      | 0.022<br>889 | 49 | 0 | 4.98E<br>-05 | 0.001<br>105 |
| LLETZ            | Corynebacterium.coylea<br>e           | Yes | -<br>0.100<br>21 | 0.021<br>806 | 49 | 0 | 3.76E<br>-05 | 0.001<br>105 |
| Previous_<br>PTB | Corynebacterium.kefirre<br>sidentii   | Yes | 0.103<br>18      | 0.022<br>889 | 49 | 0 | 4.98E<br>-05 | 0.001<br>105 |
| Previous_<br>PTB | Corynebacterium.otitidi<br>s          | Yes | 0.103<br>18      | 0.022<br>889 | 49 | 0 | 4.98E<br>-05 | 0.001<br>105 |
| Previous_<br>PTB | Cupriavidus.gilardii                  | Yes | 0.103<br>18      | 0.022<br>889 | 49 | 0 | 4.98E<br>-05 | 0.001<br>105 |
| Delivery         | Dialister.micraerophilus              | PTB | 0.573<br>332     | 0.123<br>143 | 49 | 0 | 3.10E<br>-05 | 0.001<br>105 |
| Previous_<br>PTB | Dorea.formicigenerans                 | Yes | 0.103<br>18      | 0.022<br>889 | 49 | 0 | 4.98E<br>-05 | 0.001<br>105 |
| Previous_<br>PTB | Dorea.sp900066555                     | Yes | 0.103<br>18      | 0.022<br>889 | 49 | 0 | 4.98E<br>-05 | 0.001<br>105 |
| Previous_<br>PTB | DTU078.sp002385415                    | Yes | 0.103<br>18      | 0.022<br>889 | 49 | 0 | 4.98E<br>-05 | 0.001<br>105 |
| Previous_<br>PTB | Erysipelatoclostridium.s<br>piroforme | Yes | 0.103<br>18      | 0.022<br>889 | 49 | 0 | 4.98E<br>-05 | 0.001<br>105 |
| Previous_<br>PTB | Eubacterium_E.hallii_A                | Yes | 0.103<br>18      | 0.022<br>889 | 49 | 0 | 4.98E<br>-05 | 0.001<br>105 |
| Previous_<br>PTB | Eubacterium_H.cellulos<br>olvens      | Yes | 0.103<br>18      | 0.022<br>889 | 49 | 0 | 4.98E<br>-05 | 0.001<br>105 |

|                  |                                    |     |                  |              |    |   |              |              |
|------------------|------------------------------------|-----|------------------|--------------|----|---|--------------|--------------|
| Previous_<br>PTB | Eubacterium_S.uniforme             | Yes | 0.103<br>18      | 0.022<br>889 | 49 | 0 | 4.98E<br>-05 | 0.001<br>105 |
| Previous_<br>PTB | Faecalibacterium.prausnitzii_C     | Yes | 0.103<br>18      | 0.022<br>889 | 49 | 0 | 4.98E<br>-05 | 0.001<br>105 |
| Previous_<br>PTB | Faecalibacterium.prausnitzii_D     | Yes | 0.103<br>18      | 0.022<br>889 | 49 | 0 | 4.98E<br>-05 | 0.001<br>105 |
| LLETZ            | Faecalicatena.glycyrrhizinilyticum | Yes | -<br>0.100<br>21 | 0.021<br>806 | 49 | 0 | 3.76E<br>-05 | 0.001<br>105 |
| LLETZ            | Faecalicatena.sp000403295          | Yes | -<br>0.100<br>21 | 0.021<br>806 | 49 | 0 | 3.76E<br>-05 | 0.001<br>105 |
| Previous_<br>PTB | Fastidiosipila.sanguinis           | Yes | 0.103<br>18      | 0.022<br>889 | 49 | 0 | 4.98E<br>-05 | 0.001<br>105 |
| Previous_<br>PTB | Flavonifractor.sp002161085         | Yes | 0.103<br>18      | 0.022<br>889 | 49 | 0 | 4.98E<br>-05 | 0.001<br>105 |
| Previous_<br>PTB | GCA.900066575.sp900066385          | Yes | 0.103<br>18      | 0.022<br>889 | 49 | 0 | 4.98E<br>-05 | 0.001<br>105 |
| Previous_<br>PTB | Gordonia.jacobaea                  | Yes | 0.103<br>18      | 0.022<br>889 | 49 | 0 | 4.98E<br>-05 | 0.001<br>105 |
| Previous_<br>PTB | GWC2.39.14.sp000996245             | Yes | 0.103<br>18      | 0.022<br>889 | 49 | 0 | 4.98E<br>-05 | 0.001<br>105 |
| Previous_<br>PTB | Hungatella.effluvii                | Yes | 0.103<br>18      | 0.022<br>889 | 49 | 0 | 4.98E<br>-05 | 0.001<br>105 |
| Previous_<br>PTB | Ileibacterium.valens               | Yes | 0.103<br>18      | 0.022<br>889 | 49 | 0 | 4.98E<br>-05 | 0.001<br>105 |
| Previous_<br>PTB | KLE1615.sp900066985                | Yes | 0.103            | 0.022        | 49 | 0 | 4.98E        | 0.001        |

|              |                                   |     |          |          |    |   |          |          |
|--------------|-----------------------------------|-----|----------|----------|----|---|----------|----------|
| PTB          |                                   |     | 18       | 889      |    |   | -05      | 105      |
| LLETZ        | Lachnospira.eligens_B             | Yes | -0.10021 | 0.021806 | 49 | 0 | 3.76E-05 | 0.001105 |
| Previous_PTB | Lysinibacillus.fusiformis_D       | Yes | 0.10318  | 0.022889 | 49 | 0 | 4.98E-05 | 0.001105 |
| Previous_PTB | Marvinbryantia.sp900066075        | Yes | 0.10318  | 0.022889 | 49 | 0 | 4.98E-05 | 0.001105 |
| Previous_PTB | Methylobacterium.orga<br>nophilum | Yes | 0.10318  | 0.022889 | 49 | 0 | 4.98E-05 | 0.001105 |
| Previous_PTB | Micromonospora.sp003176735        | Yes | 0.10318  | 0.022889 | 49 | 0 | 4.98E-05 | 0.001105 |
| Previous_PTB | Mycolicibacterium.sp001665685     | Yes | 0.597135 | 0.132389 | 49 | 0 | 4.94E-05 | 0.001105 |
| Previous_PTB | Negativibacillus.massili<br>ensis | Yes | 0.10318  | 0.022889 | 49 | 0 | 4.98E-05 | 0.001105 |
| Previous_PTB | OEMS01.sp900199405                | Yes | 0.10318  | 0.022889 | 49 | 0 | 4.98E-05 | 0.001105 |
| Previous_PTB | Oxalobacter.formigenes_B          | Yes | 0.10318  | 0.022889 | 49 | 0 | 4.98E-05 | 0.001105 |
| Previous_PTB | Paludibacter_A.jiangxiensis       | Yes | 0.10318  | 0.022889 | 49 | 0 | 4.98E-05 | 0.001105 |
| Previous_PTB | Parabacteroides.timonensis        | Yes | 0.10318  | 0.022889 | 49 | 0 | 4.98E-05 | 0.001105 |
| Previous_PTB | Parasporobacterium.paucivorans    | Yes | 0.10318  | 0.022889 | 49 | 0 | 4.98E-05 | 0.001105 |
| Previous_PTB | Prevotella.sp002251365            | Yes | 0.10318  | 0.022889 | 49 | 0 | 4.98E-05 | 0.001105 |



|                  |                                            |     |             |              |    |   |              |              |
|------------------|--------------------------------------------|-----|-------------|--------------|----|---|--------------|--------------|
| PTB              |                                            |     | 18          | 889          |    |   | -05          | 105          |
| Previous_<br>PTB | <i>Pseudomonas_E.hunane<br/>nsis</i>       | Yes | 0.103<br>18 | 0.022<br>889 | 49 | 0 | 4.98E<br>-05 | 0.001<br>105 |
| Previous_<br>PTB | <i>Ralstonia.pickettii</i>                 | Yes | 0.103<br>18 | 0.022<br>889 | 49 | 0 | 4.98E<br>-05 | 0.001<br>105 |
| Previous_<br>PTB | <i>Ralstonia.pseudosolana<br/>cearum</i>   | Yes | 0.103<br>18 | 0.022<br>889 | 49 | 0 | 4.98E<br>-05 | 0.001<br>105 |
| Previous_<br>PTB | RC9.sp000434935                            | Yes | 0.103<br>18 | 0.022<br>889 | 49 | 0 | 4.98E<br>-05 | 0.001<br>105 |
| Previous_<br>PTB | <i>Rubellimicrobium.ther<br/>mophilum</i>  | Yes | 0.103<br>18 | 0.022<br>889 | 49 | 0 | 4.98E<br>-05 | 0.001<br>105 |
| Previous_<br>PTB | RUG210.sp003265305                         | Yes | 0.103<br>18 | 0.022<br>889 | 49 | 0 | 4.98E<br>-05 | 0.001<br>105 |
| Previous_<br>PTB | RUG350.sp900315995                         | Yes | 0.103<br>18 | 0.022<br>889 | 49 | 0 | 4.98E<br>-05 | 0.001<br>105 |
| Previous_<br>PTB | <i>Ruminococcus_F.cham<br/>panellensis</i> | Yes | 0.103<br>18 | 0.022<br>889 | 49 | 0 | 4.98E<br>-05 | 0.001<br>105 |
| Previous_<br>PTB | <i>Soleaferrea.massiliensis</i>            | Yes | 0.103<br>18 | 0.022<br>889 | 49 | 0 | 4.98E<br>-05 | 0.001<br>105 |
| Previous_<br>PTB | <i>Sporobacter.termitidis</i>              | Yes | 0.103<br>18 | 0.022<br>889 | 49 | 0 | 4.98E<br>-05 | 0.001<br>105 |
| Previous_<br>PTB | <i>Stenotrophomonas.malt<br/>ophilia</i>   | Yes | 0.103<br>18 | 0.022<br>889 | 49 | 0 | 4.98E<br>-05 | 0.001<br>105 |
| Previous_<br>PTB | <i>Stenotrophomonas.rhizo<br/>phila_A</i>  | Yes | 0.103<br>18 | 0.022<br>889 | 49 | 0 | 4.98E<br>-05 | 0.001<br>105 |
| Previous_<br>PTB | <i>Streptococcus.thermoph<br/>ilus</i>     | Yes | 0.103<br>18 | 0.022<br>889 | 49 | 0 | 4.98E<br>-05 | 0.001<br>105 |

|                  |                                    |     |                  |              |    |   |              |              |
|------------------|------------------------------------|-----|------------------|--------------|----|---|--------------|--------------|
| Previous_<br>PTB | Streptomyces.papulosa              | Yes | 0.103<br>18      | 0.022<br>889 | 49 | 0 | 4.98E<br>-05 | 0.001<br>105 |
| Previous_<br>PTB | Sutterella.wadsworthensis_B        | Yes | 0.103<br>18      | 0.022<br>889 | 49 | 0 | 4.98E<br>-05 | 0.001<br>105 |
| Previous_<br>PTB | SZUA.51.sp003232965                | Yes | 0.103<br>18      | 0.022<br>889 | 49 | 0 | 4.98E<br>-05 | 0.001<br>105 |
| Previous_<br>PTB | Tepidanaerobacter.syntr<br>ophicus | Yes | 0.103<br>18      | 0.022<br>889 | 49 | 0 | 4.98E<br>-05 | 0.001<br>105 |
| Previous_<br>PTB | TF01.11.sp003524945                | Yes | 0.103<br>18      | 0.022<br>889 | 49 | 0 | 4.98E<br>-05 | 0.001<br>105 |
| Previous_<br>PTB | Tidjanibacter.inops                | Yes | 0.103<br>18      | 0.022<br>889 | 49 | 0 | 4.98E<br>-05 | 0.001<br>105 |
| LLETZ            | Tyzzarella.nexilis                 | Yes | -<br>0.100<br>21 | 0.021<br>806 | 49 | 0 | 3.76E<br>-05 | 0.001<br>105 |
| Previous_<br>PTB | UBA11774.sp00350765<br>5           | Yes | 0.103<br>18      | 0.022<br>889 | 49 | 0 | 4.98E<br>-05 | 0.001<br>105 |
| Previous_<br>PTB | UBA1191.sp900066305                | Yes | 0.103<br>18      | 0.022<br>889 | 49 | 0 | 4.98E<br>-05 | 0.001<br>105 |
| Previous_<br>PTB | UBA1259.sp900320065                | Yes | 0.103<br>18      | 0.022<br>889 | 49 | 0 | 4.98E<br>-05 | 0.001<br>105 |
| Previous_<br>PTB | UBA3566.sp002376065                | Yes | 0.103<br>18      | 0.022<br>889 | 49 | 0 | 4.98E<br>-05 | 0.001<br>105 |
| Previous_<br>PTB | UBA7524.sp002478275                | Yes | 0.103<br>18      | 0.022<br>889 | 49 | 0 | 4.98E<br>-05 | 0.001<br>105 |
| Previous_<br>PTB | UBA9655.sp001767835                | Yes | 0.103<br>18      | 0.022<br>889 | 49 | 0 | 4.98E<br>-05 | 0.001<br>105 |

|                  |                                 |      |                  |              |    |   |              |              |
|------------------|---------------------------------|------|------------------|--------------|----|---|--------------|--------------|
| Previous_<br>PTB | Veillonella.rogosae             | Yes  | 0.103<br>18      | 0.022<br>889 | 49 | 0 | 4.98E<br>-05 | 0.001<br>105 |
| Previous_<br>PTB | W11650.sp002999035              | Yes  | 0.103<br>18      | 0.022<br>889 | 49 | 0 | 4.98E<br>-05 | 0.001<br>105 |
| LLETZ            | TF01.11.sp001414325             | Yes  | 0.327<br>155     | 0.072<br>806 | 49 | 0 | 5.21E<br>-05 | 0.001<br>152 |
| Risk_grou<br>p   | QAMH01.sp003149935              | Risk | -<br>0.196<br>46 | 0.043<br>775 | 49 | 0 | 5.31E<br>-05 | 0.001<br>167 |
| Risk_grou<br>p   | CAG.590.sp003530125             | Risk | 0.165<br>181     | 0.037<br>106 | 49 | 0 | 5.96E<br>-05 | 0.001<br>304 |
| LLETZ            | Helicobacter.pylori             | Yes  | 0.237<br>067     | 0.053<br>404 | 49 | 0 | 6.20E<br>-05 | 0.001<br>351 |
| Previous_<br>PTB | Alistipes.putredinis            | Yes  | 0.363<br>906     | 0.082<br>609 | 49 | 0 | 6.91E<br>-05 | 0.001<br>498 |
| LLETZ            | Alistipes.sp000434235           | Yes  | 0.282<br>823     | 0.064<br>433 | 49 | 0 | 7.26E<br>-05 | 0.001<br>52  |
| LLETZ            | Bacteroides.helcogenes          | Yes  | 0.282<br>823     | 0.064<br>433 | 49 | 0 | 7.26E<br>-05 | 0.001<br>52  |
| LLETZ            | CAG.462.sp900291465             | Yes  | 0.282<br>823     | 0.064<br>433 | 49 | 0 | 7.26E<br>-05 | 0.001<br>52  |
| LLETZ            | Copro bacter.fastidiosus        | Yes  | 0.282<br>823     | 0.064<br>433 | 49 | 0 | 7.26E<br>-05 | 0.001<br>52  |
| LLETZ            | Parabacteroides.sp9001<br>55425 | Yes  | 0.282<br>823     | 0.064<br>433 | 49 | 0 | 7.26E<br>-05 | 0.001<br>52  |
| LLETZ            | RUG762.sp900316495              | Yes  | 0.282<br>823     | 0.064<br>433 | 49 | 0 | 7.26E<br>-05 | 0.001<br>52  |

|                  |                                |     |              |              |    |   |              |              |
|------------------|--------------------------------|-----|--------------|--------------|----|---|--------------|--------------|
| LLETZ            | Senegalimassilia.anaerobia     | Yes | 0.282<br>823 | 0.064<br>433 | 49 | 0 | 7.26E<br>-05 | 0.001<br>52  |
| LLETZ            | Turicibacter.sp001543345       | Yes | 0.282<br>823 | 0.064<br>433 | 49 | 0 | 7.26E<br>-05 | 0.001<br>52  |
| LLETZ            | Blautia_A.sp900066145          | Yes | 0.343<br>238 | 0.078<br>591 | 49 | 0 | 7.79E<br>-05 | 0.001<br>621 |
| Previous_<br>PTB | TF01.11.sp001414325            | Yes | 0.330<br>689 | 0.075<br>734 | 49 | 0 | 7.81E<br>-05 | 0.001<br>621 |
| LLETZ            | GWF2.35.48.sp001769125         | Yes | 0.094<br>01  | 0.021<br>652 | 49 | 0 | 8.44E<br>-05 | 0.001<br>729 |
| LLETZ            | Methanobrevibacter.ruminantium | Yes | 0.094<br>01  | 0.021<br>652 | 49 | 0 | 8.44E<br>-05 | 0.001<br>729 |
| LLETZ            | TMED.70.sp002171675            | Yes | 0.094<br>01  | 0.021<br>652 | 49 | 0 | 8.44E<br>-05 | 0.001<br>729 |
| Previous_<br>PTB | Alistipes.sp000434235          | Yes | 0.287<br>866 | 0.067<br>024 | 49 | 0 | 9.79E<br>-05 | 0.001<br>939 |
| Previous_<br>PTB | Bacteroides.helcogenes         | Yes | 0.287<br>866 | 0.067<br>024 | 49 | 0 | 9.79E<br>-05 | 0.001<br>939 |
| Previous_<br>PTB | CAG.462.sp900291465            | Yes | 0.287<br>866 | 0.067<br>024 | 49 | 0 | 9.79E<br>-05 | 0.001<br>939 |
| Previous_<br>PTB | Coprobacter.fastidiosus        | Yes | 0.287<br>866 | 0.067<br>024 | 49 | 0 | 9.79E<br>-05 | 0.001<br>939 |
| Previous_<br>PTB | Parabacteroides.sp900155425    | Yes | 0.287<br>866 | 0.067<br>024 | 49 | 0 | 9.79E<br>-05 | 0.001<br>939 |
| Previous_<br>PTB | RUG762.sp900316495             | Yes | 0.287<br>866 | 0.067<br>024 | 49 | 0 | 9.79E<br>-05 | 0.001<br>939 |

|                  |                                |     |              |              |    |   |              |              |
|------------------|--------------------------------|-----|--------------|--------------|----|---|--------------|--------------|
| Previous_<br>PTB | Senegalimassilia.anaerob<br>ia | Yes | 0.287<br>866 | 0.067<br>024 | 49 | 0 | 9.79E<br>-05 | 0.001<br>939 |
| Previous_<br>PTB | Turicibacter.sp0015433<br>45   | Yes | 0.287<br>866 | 0.067<br>024 | 49 | 0 | 9.79E<br>-05 | 0.001<br>939 |
| LLETZ            | CAG.110.sp003525905            | Yes | 0.298<br>906 | 0.071<br>164 | 49 | 0 | 0.000<br>132 | 0.002<br>599 |
| LLETZ            | Acetatifactor.sp9000663<br>65  | Yes | 0.220<br>34  | 0.053<br>059 | 49 | 0 | 0.000<br>153 | 0.002<br>797 |
| LLETZ            | Alistipes.sp900021155          | Yes | 0.220<br>34  | 0.053<br>059 | 49 | 0 | 0.000<br>153 | 0.002<br>797 |
| LLETZ            | Bacteroides.ndongoniae         | Yes | 0.220<br>34  | 0.053<br>059 | 49 | 0 | 0.000<br>153 | 0.002<br>797 |
| LLETZ            | Bacteroides.sp0021600<br>55    | Yes | 0.220<br>34  | 0.053<br>059 | 49 | 0 | 0.000<br>153 | 0.002<br>797 |
| Delivery         | Bifidobacterium.vaginal<br>e_F | PTB | 0.434<br>851 | 0.104<br>444 | 49 | 0 | 0.000<br>148 | 0.002<br>797 |
| LLETZ            | Blautia_A.wexlerae             | Yes | 0.220<br>34  | 0.053<br>059 | 49 | 0 | 0.000<br>153 | 0.002<br>797 |
| LLETZ            | Brevundimonas.sp0024<br>34505  | Yes | 0.220<br>34  | 0.053<br>059 | 49 | 0 | 0.000<br>153 | 0.002<br>797 |
| LLETZ            | CAG.354.sp001915925            | Yes | 0.220<br>34  | 0.053<br>059 | 49 | 0 | 0.000<br>153 | 0.002<br>797 |
| LLETZ            | CAG.56.sp900066615             | Yes | 0.220<br>34  | 0.053<br>059 | 49 | 0 | 0.000<br>153 | 0.002<br>797 |
| LLETZ            | Delftia.acidovorans            | Yes | 0.220<br>34  | 0.053<br>059 | 49 | 0 | 0.000<br>153 | 0.002<br>797 |

|              |                                  |     |             |              |    |   |              |              |
|--------------|----------------------------------|-----|-------------|--------------|----|---|--------------|--------------|
| LLETZ        | F0540.sp000466585                | Yes | 0.220<br>34 | 0.053<br>059 | 49 | 0 | 0.000<br>153 | 0.002<br>797 |
| LLETZ        | Faecalibacterium.prausnitzii_G   | Yes | 0.220<br>34 | 0.053<br>059 | 49 | 0 | 0.000<br>153 | 0.002<br>797 |
| LLETZ        | GCA.900066135.sp900066135        | Yes | 0.220<br>34 | 0.053<br>059 | 49 | 0 | 0.000<br>153 | 0.002<br>797 |
| LLETZ        | Gemmiger.sp003476825             | Yes | 0.220<br>34 | 0.053<br>059 | 49 | 0 | 0.000<br>153 | 0.002<br>797 |
| LLETZ        | Gemmiger.variabile               | Yes | 0.220<br>34 | 0.053<br>059 | 49 | 0 | 0.000<br>153 | 0.002<br>797 |
| LLETZ        | Parasutterella.excrementihominis | Yes | 0.220<br>34 | 0.053<br>059 | 49 | 0 | 0.000<br>153 | 0.002<br>797 |
| LLETZ        | Roseburia.hominis                | Yes | 0.220<br>34 | 0.053<br>059 | 49 | 0 | 0.000<br>153 | 0.002<br>797 |
| LLETZ        | Ruminococcus_A.sp003011855       | Yes | 0.220<br>34 | 0.053<br>059 | 49 | 0 | 0.000<br>153 | 0.002<br>797 |
| LLETZ        | UBA11524.sp000437595             | Yes | 0.220<br>34 | 0.053<br>059 | 49 | 0 | 0.000<br>153 | 0.002<br>797 |
| Previous_PTB | Acetatifactor.sp900066365        | Yes | 0.227<br>51 | 0.055<br>193 | 49 | 0 | 0.000<br>168 | 0.002<br>88  |
| Previous_PTB | Alistipes.sp900021155            | Yes | 0.227<br>51 | 0.055<br>193 | 49 | 0 | 0.000<br>168 | 0.002<br>88  |
| Previous_PTB | Bacteroides.ndongoniae           | Yes | 0.227<br>51 | 0.055<br>193 | 49 | 0 | 0.000<br>168 | 0.002<br>88  |
| Previous_PTB | Bacteroides.sp002160055          | Yes | 0.227<br>51 | 0.055<br>193 | 49 | 0 | 0.000<br>168 | 0.002<br>88  |

|                  |                                              |     |             |              |    |   |              |             |
|------------------|----------------------------------------------|-----|-------------|--------------|----|---|--------------|-------------|
| Previous_<br>PTB | <i>Blautia_A.wexlerae</i>                    | Yes | 0.227<br>51 | 0.055<br>193 | 49 | 0 | 0.000<br>168 | 0.002<br>88 |
| Previous_<br>PTB | <i>Brevundimonas.sp0024<br/>34505</i>        | Yes | 0.227<br>51 | 0.055<br>193 | 49 | 0 | 0.000<br>168 | 0.002<br>88 |
| Previous_<br>PTB | <i>CAG.354.sp001915925</i>                   | Yes | 0.227<br>51 | 0.055<br>193 | 49 | 0 | 0.000<br>168 | 0.002<br>88 |
| Previous_<br>PTB | <i>CAG.56.sp900066615</i>                    | Yes | 0.227<br>51 | 0.055<br>193 | 49 | 0 | 0.000<br>168 | 0.002<br>88 |
| Previous_<br>PTB | <i>Delftia.acidovorans</i>                   | Yes | 0.227<br>51 | 0.055<br>193 | 49 | 0 | 0.000<br>168 | 0.002<br>88 |
| Previous_<br>PTB | <i>F0540.sp000466585</i>                     | Yes | 0.227<br>51 | 0.055<br>193 | 49 | 0 | 0.000<br>168 | 0.002<br>88 |
| Previous_<br>PTB | <i>Faecalibacterium.prausn<br/>itzii_G</i>   | Yes | 0.227<br>51 | 0.055<br>193 | 49 | 0 | 0.000<br>168 | 0.002<br>88 |
| Previous_<br>PTB | <i>GCA.900066135.sp900<br/>066135</i>        | Yes | 0.227<br>51 | 0.055<br>193 | 49 | 0 | 0.000<br>168 | 0.002<br>88 |
| Previous_<br>PTB | <i>Gemmiger.sp00347682<br/>5</i>             | Yes | 0.227<br>51 | 0.055<br>193 | 49 | 0 | 0.000<br>168 | 0.002<br>88 |
| Previous_<br>PTB | <i>Gemmiger.variabile</i>                    | Yes | 0.227<br>51 | 0.055<br>193 | 49 | 0 | 0.000<br>168 | 0.002<br>88 |
| Previous_<br>PTB | <i>Parasutterella.excrement<br/>ihominis</i> | Yes | 0.227<br>51 | 0.055<br>193 | 49 | 0 | 0.000<br>168 | 0.002<br>88 |
| Previous_<br>PTB | <i>Roseburia.hominis</i>                     | Yes | 0.227<br>51 | 0.055<br>193 | 49 | 0 | 0.000<br>168 | 0.002<br>88 |
| Previous_<br>PTB | <i>Ruminococcus_A.sp003<br/>011855</i>       | Yes | 0.227<br>51 | 0.055<br>193 | 49 | 0 | 0.000<br>168 | 0.002<br>88 |

|                   |                               |                     |                 |              |    |   |              |              |
|-------------------|-------------------------------|---------------------|-----------------|--------------|----|---|--------------|--------------|
| Previous_<br>PTB  | UBA11524.sp00043759<br>5      | Yes                 | 0.227<br>51     | 0.055<br>193 | 49 | 0 | 0.000<br>168 | 0.002<br>88  |
| Delivery          | DNF00809.sp00155293<br>5      | PTB                 | 0.698<br>342    | 0.171<br>029 | 49 | 0 | 0.000<br>19  | 0.003<br>231 |
| Delivery          | Prevotella.bergensis          | PTB                 | 0.102<br>104    | 0.025<br>009 | 49 | 0 | 0.000<br>19  | 0.003<br>231 |
| Outcome_<br>group | Lactobacillus_H.vaginal<br>is | no-<br>risk_P<br>TB | 2.616<br>953    | 0.647<br>005 | 49 | 0 | 0.000<br>214 | 0.003<br>62  |
| LLETZ             | Delftia.tsuruhatensis         | Yes                 | 0.305<br>389    | 0.076<br>279 | 49 | 0 | 0.000<br>242 | 0.004<br>095 |
| Delivery          | Prevotella.timonensis         | PTB                 | 0.651<br>093    | 0.164<br>439 | 49 | 0 | 0.000<br>278 | 0.004<br>672 |
| Previous_<br>PTB  | Bacillus.atrophaeus           | Yes                 | 0.367<br>338    | 0.092<br>834 | 49 | 0 | 0.000<br>28  | 0.004<br>693 |
| LLETZ             | Cutibacterium.humerusi<br>i   | Yes                 | 0.328<br>101    | 0.082<br>96  | 49 | 0 | 0.000<br>281 | 0.004<br>705 |
| Previous_<br>PTB  | Salinicola.sp003206695        | Yes                 | -<br>0.197<br>8 | 0.050<br>058 | 49 | 0 | 0.000<br>284 | 0.004<br>74  |
| Previous_<br>PTB  | Delftia.tsuruhatensis         | Yes                 | 0.312<br>945    | 0.079<br>347 | 49 | 0 | 0.000<br>291 | 0.004<br>831 |
| Delivery          | Anaerococcus.tetradus         | PTB                 | 0.107<br>347    | 0.027<br>232 | 49 | 0 | 0.000<br>293 | 0.004<br>845 |
| LLETZ             | Bilophila.wadsworthia         | Yes                 | 0.234<br>502    | 0.059<br>523 | 49 | 0 | 0.000<br>295 | 0.004<br>845 |
| LLETZ             | Pseudoflavonifractor.sp       | Yes                 | 0.234           | 0.059        | 49 | 0 | 0.000        | 0.004        |



|             |                                |      |                 |              |    |   |              |              |
|-------------|--------------------------------|------|-----------------|--------------|----|---|--------------|--------------|
|             | 900079765                      |      | 502             | 523          |    |   | 295          | 845          |
| Previous_PT | Cutibacterium.humerusi         | Yes  | 0.338<br>188    | 0.086<br>296 | 49 | 0 | 0.000<br>314 | 0.005<br>145 |
| Previous_PT | Faecalibacterium.prausnitzii_H | Yes  | 0.184<br>686    | 0.047<br>305 | 49 | 0 | 0.000<br>329 | 0.005<br>364 |
| LLETZ       | HRBIN23.sp002923335            | Yes  | 0.437<br>591    | 0.112<br>599 | 49 | 0 | 0.000<br>347 | 0.005<br>645 |
| LLETZ       | Faecalibacterium.prausnitzii_H | Yes  | 0.176<br>008    | 0.045<br>476 | 49 | 0 | 0.000<br>364 | 0.005<br>904 |
| Risk_group  | X2.01.FULL.66.17.sp01803875    | Risk | -<br>0.093<br>6 | 0.024<br>767 | 49 | 0 | 0.000<br>48  | 0.005<br>939 |
| Risk_group  | Achromobacter.sp001299435      | Risk | -<br>0.093<br>6 | 0.024<br>767 | 49 | 0 | 0.000<br>48  | 0.005<br>939 |
| LLETZ       | Actinotignum.urinale           | Yes  | 0.168<br>492    | 0.044<br>249 | 49 | 0 | 0.000<br>44  | 0.005<br>939 |
| Previous_PT | Actinotignum.urinale           | Yes  | 0.177<br>426    | 0.046<br>028 | 49 | 0 | 0.000<br>382 | 0.005<br>939 |
| Risk_group  | Agrobacterium.sp900013535      | Risk | -<br>0.093<br>6 | 0.024<br>767 | 49 | 0 | 0.000<br>48  | 0.005<br>939 |
| Risk_group  | Akkermansia.glycaniphila       | Risk | -<br>0.093<br>6 | 0.024<br>767 | 49 | 0 | 0.000<br>48  | 0.005<br>939 |
| Risk_group  | Aliarcobacter.cryaerophilus_A  | Risk | -<br>0.093<br>6 | 0.024<br>767 | 49 | 0 | 0.000<br>48  | 0.005<br>939 |

|            |                                  |      |                 |              |    |   |              |              |
|------------|----------------------------------|------|-----------------|--------------|----|---|--------------|--------------|
| Risk_group | <i>Alistipes.onderdonkii</i>     | Risk | -<br>0.093<br>6 | 0.024<br>767 | 49 | 0 | 0.000<br>48  | 0.005<br>939 |
| Risk_group | <i>Alistipes.senegalensis</i>    | Risk | -<br>0.093<br>6 | 0.024<br>767 | 49 | 0 | 0.000<br>48  | 0.005<br>939 |
| Risk_group | <i>Alistipes_A.indistinctus</i>  | Risk | -<br>0.093<br>6 | 0.024<br>767 | 49 | 0 | 0.000<br>48  | 0.005<br>939 |
| Risk_group | ASF356.sp000364165               | Risk | -<br>0.093<br>6 | 0.024<br>767 | 49 | 0 | 0.000<br>48  | 0.005<br>939 |
| LLETZ      | <i>Bacillus.atrophaeus</i>       | Yes  | 0.342<br>008    | 0.089<br>245 | 49 | 0 | 0.000<br>409 | 0.005<br>939 |
| Risk_group | Bact.08.sp000473305              | Risk | -<br>0.093<br>6 | 0.024<br>767 | 49 | 0 | 0.000<br>48  | 0.005<br>939 |
| Risk_group | <i>Bacteroides_A.plebeius</i>    | Risk | -<br>0.093<br>6 | 0.024<br>767 | 49 | 0 | 0.000<br>48  | 0.005<br>939 |
| Risk_group | <i>Baumannia.cicadellinica_C</i> | Risk | -<br>0.093<br>6 | 0.024<br>767 | 49 | 0 | 0.000<br>48  | 0.005<br>939 |
| Risk_group | <i>Blastococcus.sp003075095</i>  | Risk | -<br>0.093<br>6 | 0.024<br>767 | 49 | 0 | 0.000<br>48  | 0.005<br>939 |
| Risk_group | <i>Blautia_A.sp000285855</i>     | Risk | -<br>0.093<br>6 | 0.024<br>767 | 49 | 0 | 0.000<br>48  | 0.005<br>939 |
| Risk_group | <i>Brevundimonas.sp002157625</i> | Risk | -<br>0.093      | 0.024<br>767 | 49 | 0 | 0.000<br>48  | 0.005<br>939 |

6

|            |                              |      |         |          |    |   |         |          |
|------------|------------------------------|------|---------|----------|----|---|---------|----------|
| Risk_group | Brevundimonas.sp002484265    | Risk | -0.0936 | 0.024767 | 49 | 0 | 0.00048 | 0.005939 |
| Risk_group | Butyricicoccus.pullicaecorum | Risk | -0.0936 | 0.024767 | 49 | 0 | 0.00048 | 0.005939 |
| Risk_group | Butyricimonas.sp002161485    | Risk | -0.0936 | 0.024767 | 49 | 0 | 0.00048 | 0.005939 |
| Risk_group | Butyrivibrio_A.crossotus     | Risk | -0.0936 | 0.024767 | 49 | 0 | 0.00048 | 0.005939 |
| Risk_group | CAG.110.sp002437585          | Risk | -0.0936 | 0.024767 | 49 | 0 | 0.00048 | 0.005939 |
| Risk_group | CAG.194.sp000432915          | Risk | -0.0936 | 0.024767 | 49 | 0 | 0.00048 | 0.005939 |
| Risk_group | CAG.302.sp002375205          | Risk | -0.0936 | 0.024767 | 49 | 0 | 0.00048 | 0.005939 |
| Risk_group | CAG.83.sp000435555           | Risk | -0.0936 | 0.024767 | 49 | 0 | 0.00048 | 0.005939 |
| Risk_group | CAG.83.sp001916855           | Risk | -0.0936 | 0.024767 | 49 | 0 | 0.00048 | 0.005939 |
| Risk_group | Campylobacter_D.jejuni       | Risk | -0.0936 | 0.024767 | 49 | 0 | 0.00048 | 0.005939 |

|            |                                 |      |                 |              |    |   |             |              |
|------------|---------------------------------|------|-----------------|--------------|----|---|-------------|--------------|
| Risk_group | Clostridium.taeniosporum        | Risk | -<br>0.093<br>6 | 0.024<br>767 | 49 | 0 | 0.000<br>48 | 0.005<br>939 |
| Risk_group | Clostridium_AN.bornimense       | Risk | -<br>0.093<br>6 | 0.024<br>767 | 49 | 0 | 0.000<br>48 | 0.005<br>939 |
| Risk_group | Clostridium_Q.sp003024715       | Risk | -<br>0.093<br>6 | 0.024<br>767 | 49 | 0 | 0.000<br>48 | 0.005<br>939 |
| Risk_group | Corynebacterium.appendicis      | Risk | -<br>0.093<br>6 | 0.024<br>767 | 49 | 0 | 0.000<br>48 | 0.005<br>939 |
| Risk_group | Corynebacterium.kefirresidentii | Risk | -<br>0.093<br>6 | 0.024<br>767 | 49 | 0 | 0.000<br>48 | 0.005<br>939 |
| Risk_group | Corynebacterium.otitidis        | Risk | -<br>0.093<br>6 | 0.024<br>767 | 49 | 0 | 0.000<br>48 | 0.005<br>939 |
| Risk_group | Cupriavidus.gilardii            | Risk | -<br>0.093<br>6 | 0.024<br>767 | 49 | 0 | 0.000<br>48 | 0.005<br>939 |
| Risk_group | Dorea.formicigenerans           | Risk | -<br>0.093<br>6 | 0.024<br>767 | 49 | 0 | 0.000<br>48 | 0.005<br>939 |
| Risk_group | Dorea.sp900066555               | Risk | -<br>0.093<br>6 | 0.024<br>767 | 49 | 0 | 0.000<br>48 | 0.005<br>939 |
| Risk_group | DTU078.sp002385415              | Risk | -<br>0.093<br>6 | 0.024<br>767 | 49 | 0 | 0.000<br>48 | 0.005<br>939 |
| Risk_group | Erysipelatoclostridium.s        | Risk | -<br>0.093      | 0.024        | 49 | 0 | 0.000       | 0.005        |

|            |                          |      |       |       |    |   |       |       |
|------------|--------------------------|------|-------|-------|----|---|-------|-------|
| p          | piroforme                |      | 6     | 767   |    |   | 48    | 939   |
| Risk_group | Eubacterium_E.hallii_A   | Risk | -     | 0.024 | 49 | 0 | 0.000 | 0.005 |
| p          |                          |      | 0.093 | 767   |    |   | 48    | 939   |
|            |                          |      | 6     |       |    |   |       |       |
| Risk_group | Eubacterium_H.cellulos   | Risk | -     | 0.024 | 49 | 0 | 0.000 | 0.005 |
| p          | olvens                   |      | 0.093 | 767   |    |   | 48    | 939   |
|            |                          |      | 6     |       |    |   |       |       |
| Risk_group | Eubacterium_S.uniform    | Risk | -     | 0.024 | 49 | 0 | 0.000 | 0.005 |
| p          | e                        |      | 0.093 | 767   |    |   | 48    | 939   |
|            |                          |      | 6     |       |    |   |       |       |
| Risk_group | Faecalibacterium.prausn  | Risk | -     | 0.024 | 49 | 0 | 0.000 | 0.005 |
| p          | itzii_C                  |      | 0.093 | 767   |    |   | 48    | 939   |
|            |                          |      | 6     |       |    |   |       |       |
| Risk_group | Faecalibacterium.prausn  | Risk | -     | 0.024 | 49 | 0 | 0.000 | 0.005 |
| p          | itzii_D                  |      | 0.093 | 767   |    |   | 48    | 939   |
|            |                          |      | 6     |       |    |   |       |       |
| Risk_group | Fastidiosipila.sanguinis | Risk | -     | 0.024 | 49 | 0 | 0.000 | 0.005 |
| p          |                          |      | 0.093 | 767   |    |   | 48    | 939   |
|            |                          |      | 6     |       |    |   |       |       |
| Risk_group | Flavonifractor.sp00216   | Risk | -     | 0.024 | 49 | 0 | 0.000 | 0.005 |
| p          | 1085                     |      | 0.093 | 767   |    |   | 48    | 939   |
|            |                          |      | 6     |       |    |   |       |       |
| Risk_group | GCA.900066575.sp900      | Risk | -     | 0.024 | 49 | 0 | 0.000 | 0.005 |
| p          | 066385                   |      | 0.093 | 767   |    |   | 48    | 939   |
|            |                          |      | 6     |       |    |   |       |       |
| Risk_group | Gordonia.jacobaea        | Risk | -     | 0.024 | 49 | 0 | 0.000 | 0.005 |
| p          |                          |      | 0.093 | 767   |    |   | 48    | 939   |
|            |                          |      | 6     |       |    |   |       |       |
| Risk_group | GWC2.39.14.sp000996      | Risk | -     | 0.024 | 49 | 0 | 0.000 | 0.005 |
| p          | 245                      |      | 0.093 | 767   |    |   | 48    | 939   |
|            |                          |      | 6     |       |    |   |       |       |

|            |                               |      |                 |              |    |   |              |              |
|------------|-------------------------------|------|-----------------|--------------|----|---|--------------|--------------|
| Risk_group | Hungatella.effluvii           | Risk | -<br>0.093<br>6 | 0.024<br>767 | 49 | 0 | 0.000<br>48  | 0.005<br>939 |
| Risk_group | Ileibacterium.valens          | Risk | -<br>0.093<br>6 | 0.024<br>767 | 49 | 0 | 0.000<br>48  | 0.005<br>939 |
| Risk_group | KLE1615.sp900066985           | Risk | -<br>0.093<br>6 | 0.024<br>767 | 49 | 0 | 0.000<br>48  | 0.005<br>939 |
| Risk_group | Lysinibacillus.fusiformis_D   | Risk | -<br>0.093<br>6 | 0.024<br>767 | 49 | 0 | 0.000<br>48  | 0.005<br>939 |
| Risk_group | Marvinbryantia.sp900066075    | Risk | -<br>0.093<br>6 | 0.024<br>767 | 49 | 0 | 0.000<br>48  | 0.005<br>939 |
| Risk_group | Methylobacterium.organophilum | Risk | -<br>0.093<br>6 | 0.024<br>767 | 49 | 0 | 0.000<br>48  | 0.005<br>939 |
| Risk_group | Micromonospora.sp003176735    | Risk | -<br>0.093<br>6 | 0.024<br>767 | 49 | 0 | 0.000<br>48  | 0.005<br>939 |
| Risk_group | Negativibacillus.massiliensis | Risk | -<br>0.093<br>6 | 0.024<br>767 | 49 | 0 | 0.000<br>48  | 0.005<br>939 |
| Risk_group | OEMS01.sp900199405            | Risk | -<br>0.093<br>6 | 0.024<br>767 | 49 | 0 | 0.000<br>48  | 0.005<br>939 |
| LLETZ      | Oscillibacter.sp000403435     | Yes  | 0.236<br>424    | 0.061<br>481 | 49 | 0 | 0.000<br>393 | 0.005<br>939 |
| Risk_group | Oxalobacter.formigenes_B      | Risk | -<br>0.093      | 0.024<br>767 | 49 | 0 | 0.000<br>48  | 0.005<br>939 |

6

|            |                                |      |                  |              |    |   |              |              |
|------------|--------------------------------|------|------------------|--------------|----|---|--------------|--------------|
| Risk_group | Paludibacter_A.jiangxiensis    | Risk | -<br>0.093<br>6  | 0.024<br>767 | 49 | 0 | 0.000<br>48  | 0.005<br>939 |
| Risk_group | Parabacteroides.timonensis     | Risk | -<br>0.093<br>6  | 0.024<br>767 | 49 | 0 | 0.000<br>48  | 0.005<br>939 |
| Risk_group | Parasporobacterium.paucivorans | Risk | -<br>0.093<br>6  | 0.024<br>767 | 49 | 0 | 0.000<br>48  | 0.005<br>939 |
| Risk_group | PeH17.sp000435055              | Risk | -<br>0.355<br>21 | 0.092<br>024 | 49 | 0 | 0.000<br>376 | 0.005<br>939 |
| Risk_group | Prevotella.sp002251365         | Risk | -<br>0.093<br>6  | 0.024<br>767 | 49 | 0 | 0.000<br>48  | 0.005<br>939 |
| Risk_group | Pseudomonas_E.hunaniensis      | Risk | -<br>0.093<br>6  | 0.024<br>767 | 49 | 0 | 0.000<br>48  | 0.005<br>939 |
| Risk_group | Ralstonia.pickettii            | Risk | -<br>0.093<br>6  | 0.024<br>767 | 49 | 0 | 0.000<br>48  | 0.005<br>939 |
| Risk_group | Ralstonia.pseudosolanacearum   | Risk | -<br>0.093<br>6  | 0.024<br>767 | 49 | 0 | 0.000<br>48  | 0.005<br>939 |
| Risk_group | RC9.sp000434935                | Risk | -<br>0.093<br>6  | 0.024<br>767 | 49 | 0 | 0.000<br>48  | 0.005<br>939 |
| Risk_group | Rubellimicrobium.thermophilum  | Risk | -<br>0.093<br>6  | 0.024<br>767 | 49 | 0 | 0.000<br>48  | 0.005<br>939 |

|            |                                |      |                 |              |    |   |             |              |
|------------|--------------------------------|------|-----------------|--------------|----|---|-------------|--------------|
| Risk_group | RUG210.sp003265305             | Risk | -<br>0.093<br>6 | 0.024<br>767 | 49 | 0 | 0.000<br>48 | 0.005<br>939 |
| Risk_group | RUG350.sp900315995             | Risk | -<br>0.093<br>6 | 0.024<br>767 | 49 | 0 | 0.000<br>48 | 0.005<br>939 |
| Risk_group | Ruminococcus_F.champanellensis | Risk | -<br>0.093<br>6 | 0.024<br>767 | 49 | 0 | 0.000<br>48 | 0.005<br>939 |
| Risk_group | Soleaferrea.massiliensis       | Risk | -<br>0.093<br>6 | 0.024<br>767 | 49 | 0 | 0.000<br>48 | 0.005<br>939 |
| Risk_group | Sporobacter.termitidis         | Risk | -<br>0.093<br>6 | 0.024<br>767 | 49 | 0 | 0.000<br>48 | 0.005<br>939 |
| Risk_group | Stenotrophomonas.maltophilia   | Risk | -<br>0.093<br>6 | 0.024<br>767 | 49 | 0 | 0.000<br>48 | 0.005<br>939 |
| Risk_group | Stenotrophomonas.rhizophila_A  | Risk | -<br>0.093<br>6 | 0.024<br>767 | 49 | 0 | 0.000<br>48 | 0.005<br>939 |
| Risk_group | Streptococcus.thermophilus     | Risk | -<br>0.093<br>6 | 0.024<br>767 | 49 | 0 | 0.000<br>48 | 0.005<br>939 |
| Risk_group | Streptomyces.papulosa          | Risk | -<br>0.093<br>6 | 0.024<br>767 | 49 | 0 | 0.000<br>48 | 0.005<br>939 |
| Risk_group | Sutterella.wadsworthensis_B    | Risk | -<br>0.093<br>6 | 0.024<br>767 | 49 | 0 | 0.000<br>48 | 0.005<br>939 |
| Risk_group | SZUA.51.sp003232965            | Risk | -<br>0.093      | 0.024        | 49 | 0 | 0.000       | 0.005        |



|            |                                |      |         |          |    |   |         |          |
|------------|--------------------------------|------|---------|----------|----|---|---------|----------|
| p          |                                |      | 6       | 767      |    |   | 48      | 939      |
| Risk_group | Tepidanaerobacter.syntrophicus | Risk | -0.0936 | 0.024767 | 49 | 0 | 0.00048 | 0.005939 |
| Risk_group | TF01.11.sp003524945            | Risk | -0.0936 | 0.024767 | 49 | 0 | 0.00048 | 0.005939 |
| Risk_group | Tidjanibacter.inops            | Risk | -0.0936 | 0.024767 | 49 | 0 | 0.00048 | 0.005939 |
| Risk_group | UBA11774.sp003507655           | Risk | -0.0936 | 0.024767 | 49 | 0 | 0.00048 | 0.005939 |
| Risk_group | UBA1191.sp900066305            | Risk | -0.0936 | 0.024767 | 49 | 0 | 0.00048 | 0.005939 |
| Risk_group | UBA1259.sp900320065            | Risk | -0.0936 | 0.024767 | 49 | 0 | 0.00048 | 0.005939 |
| Risk_group | UBA3566.sp002376065            | Risk | -0.0936 | 0.024767 | 49 | 0 | 0.00048 | 0.005939 |
| Risk_group | UBA7524.sp002478275            | Risk | -0.0936 | 0.024767 | 49 | 0 | 0.00048 | 0.005939 |
| Risk_group | UBA9655.sp001767835            | Risk | -0.0936 | 0.024767 | 49 | 0 | 0.00048 | 0.005939 |
| Risk_group | Veillonella.rogosae            | Risk | -0.0936 | 0.024767 | 49 | 0 | 0.00048 | 0.005939 |

|             |                                |      |                  |              |    |   |              |              |
|-------------|--------------------------------|------|------------------|--------------|----|---|--------------|--------------|
| Risk_group  | W11650.sp002999035             | Risk | -<br>0.093<br>6  | 0.024<br>767 | 49 | 0 | 0.000<br>48  | 0.005<br>939 |
| Previous_PT | GWF2.35.48.sp001769125         | Yes  | 0.084<br>758     | 0.022<br>522 | 49 | 0 | 0.000<br>503 | 0.006<br>182 |
| Previous_PT | Methanobrevibacter.ruminantium | Yes  | 0.084<br>758     | 0.022<br>522 | 49 | 0 | 0.000<br>503 | 0.006<br>182 |
| Previous_PT | TMED.70.sp002171675            | Yes  | 0.084<br>758     | 0.022<br>522 | 49 | 0 | 0.000<br>503 | 0.006<br>182 |
| Delivery    | Bifidobacterium.vaginale_E     | PTB  | 0.750<br>174     | 0.200<br>071 | 49 | 0 | 0.000<br>524 | 0.006<br>408 |
| Previous_PT | Blautia_A.sp900066145          | Yes  | 0.306<br>564     | 0.081<br>752 | 49 | 0 | 0.000<br>524 | 0.006<br>408 |
| Delivery    | X28L.sp002892445               | PTB  | 0.251<br>108     | 0.067<br>993 | 49 | 0 | 0.000<br>621 | 0.007<br>566 |
| Risk_group  | Mycolicibacterium.sp001665685  | Risk | -<br>0.526<br>97 | 0.143<br>251 | 49 | 0 | 0.000<br>648 | 0.007<br>88  |
| Delivery    | Fannyhessea.vaginae_A          | PTB  | 0.265<br>381     | 0.072<br>234 | 49 | 0 | 0.000<br>657 | 0.007<br>972 |
| LLETZ       | Coraliomargarita.akajimensis   | Yes  | 0.268<br>237     | 0.073<br>326 | 49 | 0 | 0.000<br>689 | 0.008<br>333 |
| Delivery    | Prevotella.buccalis            | PTB  | 0.209<br>837     | 0.057<br>649 | 49 | 0 | 0.000<br>727 | 0.008<br>774 |
| Delivery    | Parvimonas.sp001552895         | PTB  | 0.289<br>622     | 0.079<br>7   | 49 | 0 | 0.000<br>74  | 0.008<br>909 |
| Delivery    | X28L.sp000177555               | PTB  | 0.806            | 0.222        | 49 | 0 | 0.000        | 0.009        |

|                  |                                    |      |                  |              |    |   |              |              |
|------------------|------------------------------------|------|------------------|--------------|----|---|--------------|--------------|
|                  |                                    |      | 192              | 178          |    |   | 752          | 028          |
| LLETZ            | CAG.45.sp900066395                 | Yes  | 0.282<br>422     | 0.078<br>001 | 49 | 0 | 0.000<br>77  | 0.009<br>194 |
| Previous_<br>PTB | HRBIN23.sp002923335                | Yes  | 0.424<br>166     | 0.117<br>128 | 49 | 0 | 0.000<br>768 | 0.009<br>194 |
| LLETZ            | CAG.269.sp001916055                | Yes  | 0.258<br>636     | 0.071<br>575 | 49 | 0 | 0.000<br>786 | 0.009<br>37  |
| Risk_grou<br>p   | GWF2.35.48.sp001769<br>125         | Risk | -<br>0.087<br>73 | 0.024<br>37  | 49 | 0 | 0.000<br>818 | 0.009<br>68  |
| Risk_grou<br>p   | Methanobrevibacter.ru<br>minantium | Risk | -<br>0.087<br>73 | 0.024<br>37  | 49 | 0 | 0.000<br>818 | 0.009<br>68  |
| Risk_grou<br>p   | TMED.70.sp002171675                | Risk | -<br>0.087<br>73 | 0.024<br>37  | 49 | 0 | 0.000<br>818 | 0.009<br>68  |
| Risk_grou<br>p   | Salinicola.sp003206695             | Risk | 0.194<br>619     | 0.054<br>165 | 49 | 0 | 0.000<br>835 | 0.009<br>853 |
| LLETZ            | Ureaplasma.urealyticum             | Yes  | 0.298<br>074     | 0.083<br>471 | 49 | 0 | 0.000<br>891 | 0.010<br>49  |
| LLETZ            | Caloramator.mitchellens<br>is      | Yes  | 0.459<br>771     | 0.128<br>949 | 49 | 0 | 0.000<br>905 | 0.010<br>633 |
| LLETZ            | Blautia_A.sp900066165              | Yes  | 0.293<br>655     | 0.082<br>395 | 49 | 0 | 0.000<br>91  | 0.010<br>655 |
| Previous_<br>PTB | CAG.110.sp003525905                | Yes  | 0.263<br>741     | 0.074<br>026 | 49 | 0 | 0.000<br>913 | 0.010<br>666 |
| LLETZ            | CAG.590.sp003530125                | Yes  | -<br>0.117       | 0.032<br>966 | 49 | 0 | 0.000<br>926 | 0.010<br>791 |

|                  |                                        |      |                  |              |    |   |              |              |
|------------------|----------------------------------------|------|------------------|--------------|----|---|--------------|--------------|
| LLETZ            | <i>Stenotrophomonas.maltophilia_AM</i> | Yes  | 0.503<br>236     | 0.141<br>711 | 49 | 0 | 0.000<br>944 | 0.010<br>984 |
| Previous_<br>PTB | <i>Helicobacter.pylori</i>             | Yes  | 0.197<br>029     | 0.055<br>552 | 49 | 0 | 0.000<br>957 | 0.011<br>101 |
| Risk_grou<br>p   | <i>Alistipes.putredinis</i>            | Risk | -<br>0.315<br>41 | 0.089<br>387 | 49 | 0 | 0.001<br>009 | 0.011<br>651 |
| LLETZ            | <i>Nocardiosis.sp900143625</i>         | Yes  | 0.343<br>83      | 0.097<br>436 | 49 | 0 | 0.001<br>008 | 0.011<br>651 |
| LLETZ            | <i>CAG.196.sp002102975</i>             | Yes  | 0.277<br>596     | 0.079<br>141 | 49 | 0 | 0.001<br>073 | 0.012<br>356 |
| Delivery         | <i>Prevotella.sp000479005</i>          | PTB  | 0.259<br>485     | 0.074<br>234 | 49 | 0 | 0.001<br>111 | 0.012<br>769 |
| Delivery         | <i>Prevotella.jejuni</i>               | PTB  | 0.155<br>996     | 0.044<br>81  | 49 | 0 | 0.001<br>158 | 0.013<br>248 |
| Risk_grou<br>p   | <i>TF01.11.sp001414325</i>             | Risk | -<br>0.285<br>27 | 0.081<br>947 | 49 | 0 | 0.001<br>158 | 0.013<br>248 |
| LLETZ            | <i>Faecalicatena.lactaris</i>          | Yes  | 0.359<br>502     | 0.103<br>574 | 49 | 0 | 0.001<br>193 | 0.013<br>615 |
| Previous_<br>PTB | <i>Stenotrophomonas.maltophilia_AM</i> | Yes  | 0.510<br>273     | 0.147<br>41  | 49 | 0 | 0.001<br>226 | 0.013<br>958 |
| Delivery         | <i>Prevotella.timonensis_A</i>         | PTB  | 0.600<br>839     | 0.173<br>694 | 49 | 0 | 0.001<br>235 | 0.014<br>022 |
| LLETZ            | <i>Caecibacter.massiliensis</i>        | Yes  | 0.279<br>517     | 0.080<br>984 | 49 | 0 | 0.001<br>263 | 0.014<br>303 |

|             |                                    |      |                  |              |    |   |              |              |
|-------------|------------------------------------|------|------------------|--------------|----|---|--------------|--------------|
| Delivery    | <i>Sneathia.amnii</i>              | PTB  | 0.299<br>569     | 0.087<br>813 | 49 | 0 | 0.001<br>417 | 0.016<br>02  |
| Risk_group  | <i>Alistipes.sp000434235</i>       | Risk | -<br>0.246<br>43 | 0.072<br>523 | 49 | 0 | 0.001<br>474 | 0.016<br>348 |
| Risk_group  | <i>Bacteroides.helcogenes</i>      | Risk | -<br>0.246<br>43 | 0.072<br>523 | 49 | 0 | 0.001<br>474 | 0.016<br>348 |
| Risk_group  | <i>CAG.462.sp900291465</i>         | Risk | -<br>0.246<br>43 | 0.072<br>523 | 49 | 0 | 0.001<br>474 | 0.016<br>348 |
| Risk_group  | <i>Coprobacter.fastidiosus</i>     | Risk | -<br>0.246<br>43 | 0.072<br>523 | 49 | 0 | 0.001<br>474 | 0.016<br>348 |
| Risk_group  | <i>Parabacteroides.sp900155425</i> | Risk | -<br>0.246<br>43 | 0.072<br>523 | 49 | 0 | 0.001<br>474 | 0.016<br>348 |
| Risk_group  | <i>RUG762.sp900316495</i>          | Risk | -<br>0.246<br>43 | 0.072<br>523 | 49 | 0 | 0.001<br>474 | 0.016<br>348 |
| Risk_group  | <i>Senegalimassilia.anaerobia</i>  | Risk | -<br>0.246<br>43 | 0.072<br>523 | 49 | 0 | 0.001<br>474 | 0.016<br>348 |
| Risk_group  | <i>Turicibacter.sp001543345</i>    | Risk | -<br>0.246<br>43 | 0.072<br>523 | 49 | 0 | 0.001<br>474 | 0.016<br>348 |
| Previous_PT | <i>Prevotella.corporis</i>         | Yes  | -<br>0.306<br>66 | 0.090<br>338 | 49 | 0 | 0.001<br>488 | 0.016<br>47  |
| LLETZ       | <i>CAG.81.sp900066785</i>          | Yes  | 0.401<br>941     | 0.118<br>503 | 49 | 0 | 0.001<br>5   | 0.016<br>561 |

|                  |                                       |      |                  |              |    |   |              |              |
|------------------|---------------------------------------|------|------------------|--------------|----|---|--------------|--------------|
| Previous_<br>PTB | <i>Caloramator.mitchellensis</i>      | Yes  | 0.454<br>094     | 0.134<br>135 | 49 | 0 | 0.001<br>528 | 0.016<br>834 |
| Delivery         | <i>Amphibacillus.xylanus</i>          | PTB  | 0.080<br>718     | 0.023<br>909 | 49 | 0 | 0.001<br>569 | 0.017<br>252 |
| Risk_group       | <i>Delftia.tsuruhatensis</i>          | Risk | -<br>0.289<br>05 | 0.085<br>857 | 49 | 0 | 0.001<br>612 | 0.017<br>682 |
| LLETZ            | <i>Staphylococcus.capitis</i>         | Yes  | 0.274<br>818     | 0.082<br>376 | 49 | 0 | 0.001<br>759 | 0.019<br>244 |
| Previous_<br>PTB | X32.111.sp001508335                   | Yes  | 0.124<br>33      | 0.037<br>48  | 49 | 0 | 0.001<br>856 | 0.019<br>342 |
| Previous_<br>PTB | <i>Akkermansia.sp001580195</i>        | Yes  | 0.124<br>33      | 0.037<br>48  | 49 | 0 | 0.001<br>856 | 0.019<br>342 |
| Previous_<br>PTB | <i>Alistipes_A.sp900240235</i>        | Yes  | 0.124<br>33      | 0.037<br>48  | 49 | 0 | 0.001<br>856 | 0.019<br>342 |
| Previous_<br>PTB | <i>Anaerosporebacter.mobilis</i>      | Yes  | 0.124<br>33      | 0.037<br>48  | 49 | 0 | 0.001<br>856 | 0.019<br>342 |
| Previous_<br>PTB | <i>Bifidobacterium.animalis</i>       | Yes  | 0.124<br>33      | 0.037<br>48  | 49 | 0 | 0.001<br>856 | 0.019<br>342 |
| Previous_<br>PTB | <i>Bilophila.wadsworthia</i>          | Yes  | 0.206<br>267     | 0.061<br>917 | 49 | 0 | 0.001<br>783 | 0.019<br>342 |
| Previous_<br>PTB | CAG.313.sp003539625                   | Yes  | 0.124<br>33      | 0.037<br>48  | 49 | 0 | 0.001<br>856 | 0.019<br>342 |
| Previous_<br>PTB | <i>Eubacterium_F.sp000687695</i>      | Yes  | 0.124<br>33      | 0.037<br>48  | 49 | 0 | 0.001<br>856 | 0.019<br>342 |
| Previous_<br>PTB | <i>Faecalibacterium.prausnitzii_K</i> | Yes  | 0.124<br>33      | 0.037<br>48  | 49 | 0 | 0.001<br>856 | 0.019<br>342 |

|                  |                                      |     |              |              |    |   |              |              |
|------------------|--------------------------------------|-----|--------------|--------------|----|---|--------------|--------------|
| Previous_<br>PTB | Faecalicatena.faecis                 | Yes | 0.124<br>33  | 0.037<br>48  | 49 | 0 | 0.001<br>856 | 0.019<br>342 |
| Previous_<br>PTB | Neoehrlichia.lotoris                 | Yes | 0.124<br>33  | 0.037<br>48  | 49 | 0 | 0.001<br>856 | 0.019<br>342 |
| Previous_<br>PTB | Oscillibacter.ruminantiu<br>m        | Yes | 0.124<br>33  | 0.037<br>48  | 49 | 0 | 0.001<br>856 | 0.019<br>342 |
| Previous_<br>PTB | Pseudoflavonifractor.sp<br>900079765 | Yes | 0.206<br>267 | 0.061<br>917 | 49 | 0 | 0.001<br>783 | 0.019<br>342 |
| Previous_<br>PTB | QALS01.sp003150575                   | Yes | 0.124<br>33  | 0.037<br>48  | 49 | 0 | 0.001<br>856 | 0.019<br>342 |
| Previous_<br>PTB | Raoultella.planticola                | Yes | 0.124<br>33  | 0.037<br>48  | 49 | 0 | 0.001<br>856 | 0.019<br>342 |
| Previous_<br>PTB | Rikenella.microfusus                 | Yes | 0.124<br>33  | 0.037<br>48  | 49 | 0 | 0.001<br>856 | 0.019<br>342 |
| Previous_<br>PTB | Ruminococcus_E.bromi<br>i            | Yes | 0.124<br>33  | 0.037<br>48  | 49 | 0 | 0.001<br>856 | 0.019<br>342 |
| Previous_<br>PTB | Ruthenibacterium.lactati<br>formans  | Yes | 0.124<br>33  | 0.037<br>48  | 49 | 0 | 0.001<br>856 | 0.019<br>342 |
| Previous_<br>PTB | Shuttleworthia.satelles              | Yes | 0.124<br>33  | 0.037<br>48  | 49 | 0 | 0.001<br>856 | 0.019<br>342 |
| Previous_<br>PTB | SK.Y3.sp002252565                    | Yes | 0.124<br>33  | 0.037<br>48  | 49 | 0 | 0.001<br>856 | 0.019<br>342 |
| Delivery         | Sneathia.sanguinegens                | PTB | 0.541<br>659 | 0.162<br>948 | 49 | 0 | 0.001<br>82  | 0.019<br>342 |
| Previous_<br>PTB | Turicibacter.sanguinis               | Yes | 0.124<br>33  | 0.037<br>48  | 49 | 0 | 0.001<br>856 | 0.019<br>342 |

|              |                            |      |                  |              |    |   |              |              |
|--------------|----------------------------|------|------------------|--------------|----|---|--------------|--------------|
| Risk_group   | Cutibacterium.humerusi     | Risk | -<br>0.308<br>63 | 0.093<br>377 | 49 | 0 | 0.001<br>92  | 0.019<br>969 |
| Previous_PTB | Staphylococcus.capitis     | Yes  | 0.282<br>914     | 0.085<br>688 | 49 | 0 | 0.001<br>94  | 0.020<br>13  |
| LLETZ        | Staphylococcus.auricularis | Yes  | 0.121<br>41      | 0.036<br>832 | 49 | 0 | 0.001<br>969 | 0.020<br>392 |
| Previous_PTB | Bifidobacterium.scardovii  | Yes  | -<br>0.315<br>64 | 0.096<br>312 | 49 | 0 | 0.002<br>078 | 0.021<br>476 |
| LLETZ        | Bacteroides.ovatus         | Yes  | 0.414<br>697     | 0.126<br>728 | 49 | 0 | 0.002<br>108 | 0.021<br>732 |
| LLETZ        | Helicobacter.pylori_C      | Yes  | 0.306<br>905     | 0.093<br>849 | 49 | 0 | 0.002<br>121 | 0.021<br>818 |
| Previous_PTB | Agathobacter.faecis        | Yes  | 0.116<br>875     | 0.036<br>424 | 49 | 0 | 0.002<br>521 | 0.024<br>718 |
| Previous_PTB | Agathobacter.rectale       | Yes  | 0.116<br>875     | 0.036<br>424 | 49 | 0 | 0.002<br>521 | 0.024<br>718 |
| Previous_PTB | Bacteroides.uniformis      | Yes  | 0.116<br>875     | 0.036<br>424 | 49 | 0 | 0.002<br>521 | 0.024<br>718 |
| Risk_group   | Acetatifactor.sp900066365  | Risk | -<br>0.191<br>68 | 0.059<br>721 | 49 | 0 | 0.002<br>515 | 0.024<br>718 |
| Risk_group   | Alistipes.sp900021155      | Risk | -<br>0.191<br>68 | 0.059<br>721 | 49 | 0 | 0.002<br>515 | 0.024<br>718 |
| Risk_group   | Bacteroides.ndongoniae     | Risk | -<br>0.191<br>68 | 0.059<br>721 | 49 | 0 | 0.002<br>515 | 0.024<br>718 |



|             |                                |      |          |          |    |   |          |          |
|-------------|--------------------------------|------|----------|----------|----|---|----------|----------|
| Risk_group  | Bacteroides.sp002160055        | Risk | -0.19168 | 0.059721 | 49 | 0 | 0.002515 | 0.024718 |
| Delivery    | Bifidobacterium.vaginale_A     | PTB  | 0.253033 | 0.078619 | 49 | 0 | 0.002453 | 0.024718 |
| Risk_group  | Blautia_A.wexlerae             | Risk | -0.19168 | 0.059721 | 49 | 0 | 0.002515 | 0.024718 |
| Risk_group  | Brevundimonas.sp002434505      | Risk | -0.19168 | 0.059721 | 49 | 0 | 0.002515 | 0.024718 |
| Risk_group  | CAG.354.sp001915925            | Risk | -0.19168 | 0.059721 | 49 | 0 | 0.002515 | 0.024718 |
| Risk_group  | CAG.56.sp900066615             | Risk | -0.19168 | 0.059721 | 49 | 0 | 0.002515 | 0.024718 |
| Previous_PT | Cutibacterium.granulosum       | Yes  | 0.301245 | 0.093476 | 49 | 0 | 0.002424 | 0.024718 |
| Risk_group  | Delftia.acidovorans            | Risk | -0.19168 | 0.059721 | 49 | 0 | 0.002515 | 0.024718 |
| Risk_group  | F0540.sp000466585              | Risk | -0.19168 | 0.059721 | 49 | 0 | 0.002515 | 0.024718 |
| Risk_group  | Faecalibacterium.prausnitzii_G | Risk | -0.19168 | 0.059721 | 49 | 0 | 0.002515 | 0.024718 |
| Risk_group  | GCA.900066135.sp900066135      | Risk | -0.19168 | 0.059721 | 49 | 0 | 0.002515 | 0.024718 |

|               |                                  |            |          |          |    |   |          |          |
|---------------|----------------------------------|------------|----------|----------|----|---|----------|----------|
| Risk_group    | Gemmiger.sp003476825             | Risk       | -0.19168 | 0.059721 | 49 | 0 | 0.002515 | 0.024718 |
| Risk_group    | Gemmiger.variabile               | Risk       | -0.19168 | 0.059721 | 49 | 0 | 0.002515 | 0.024718 |
| Risk_group    | Parasutterella.excrementihominis | Risk       | -0.19168 | 0.059721 | 49 | 0 | 0.002515 | 0.024718 |
| Risk_group    | Roseburia.hominis                | Risk       | -0.19168 | 0.059721 | 49 | 0 | 0.002515 | 0.024718 |
| Risk_group    | Ruminococcus_A.sp003011855       | Risk       | -0.19168 | 0.059721 | 49 | 0 | 0.002515 | 0.024718 |
| Risk_group    | UBA11524.sp000437595             | Risk       | -0.19168 | 0.059721 | 49 | 0 | 0.002515 | 0.024718 |
| Previous_PT   | Faecalicatena.lactaris           | Yes        | 0.345191 | 0.10774  | 49 | 0 | 0.002555 | 0.025001 |
| LLETZ         | Eisenbergiella.sp900066775       | Yes        | 0.278976 | 0.087109 | 49 | 0 | 0.002564 | 0.025043 |
| Outcome_group | Lactobacillus.gasseri            | no-risk_PT | 4.529959 | 1.424649 | 49 | 0 | 0.002733 | 0.026589 |
| Previous_PT   | Oscillibacter.sp000403435        | Yes        | 0.203385 | 0.063954 | 49 | 0 | 0.00273  | 0.026589 |
| Risk_group    | Bacillus.atrophaeus              | Risk       | -0.31932 | 0.100451 | 49 | 0 | 0.00274  | 0.026595 |

|       |                                    |     |              |              |    |   |              |              |
|-------|------------------------------------|-----|--------------|--------------|----|---|--------------|--------------|
| LLETZ | X32.111.sp001508335                | Yes | 0.113<br>526 | 0.036<br>031 | 49 | 0 | 0.002<br>962 | 0.027<br>694 |
| LLETZ | Akkermansia.sp001580<br>195        | Yes | 0.113<br>526 | 0.036<br>031 | 49 | 0 | 0.002<br>962 | 0.027<br>694 |
| LLETZ | Alistipes_A.sp9002402<br>35        | Yes | 0.113<br>526 | 0.036<br>031 | 49 | 0 | 0.002<br>962 | 0.027<br>694 |
| LLETZ | Anaerosporobacter.mob<br>ilis      | Yes | 0.113<br>526 | 0.036<br>031 | 49 | 0 | 0.002<br>962 | 0.027<br>694 |
| LLETZ | Bifidobacterium.animali<br>s       | Yes | 0.113<br>526 | 0.036<br>031 | 49 | 0 | 0.002<br>962 | 0.027<br>694 |
| LLETZ | CAG.313.sp003539625                | Yes | 0.113<br>526 | 0.036<br>031 | 49 | 0 | 0.002<br>962 | 0.027<br>694 |
| LLETZ | Eubacterium_F.sp00068<br>7695      | Yes | 0.113<br>526 | 0.036<br>031 | 49 | 0 | 0.002<br>962 | 0.027<br>694 |
| LLETZ | Faecalibacterium.prausn<br>itzii_K | Yes | 0.113<br>526 | 0.036<br>031 | 49 | 0 | 0.002<br>962 | 0.027<br>694 |
| LLETZ | Faecalicatena.faecis               | Yes | 0.113<br>526 | 0.036<br>031 | 49 | 0 | 0.002<br>962 | 0.027<br>694 |
| LLETZ | Neoehrlichia.lotoris               | Yes | 0.113<br>526 | 0.036<br>031 | 49 | 0 | 0.002<br>962 | 0.027<br>694 |
| LLETZ | Oscillibacter.ruminantiu<br>m      | Yes | 0.113<br>526 | 0.036<br>031 | 49 | 0 | 0.002<br>962 | 0.027<br>694 |
| LLETZ | QALS01.sp003150575                 | Yes | 0.113<br>526 | 0.036<br>031 | 49 | 0 | 0.002<br>962 | 0.027<br>694 |
| LLETZ | Raoultella.planticola              | Yes | 0.113<br>526 | 0.036<br>031 | 49 | 0 | 0.002<br>962 | 0.027<br>694 |

|                  |                                     |     |              |              |    |   |              |              |
|------------------|-------------------------------------|-----|--------------|--------------|----|---|--------------|--------------|
| LLETZ            | Rikenella.microfusus                | Yes | 0.113<br>526 | 0.036<br>031 | 49 | 0 | 0.002<br>962 | 0.027<br>694 |
| LLETZ            | Ruminococcus_E.bromi<br>i           | Yes | 0.113<br>526 | 0.036<br>031 | 49 | 0 | 0.002<br>962 | 0.027<br>694 |
| LLETZ            | Ruthenibacterium.lactati<br>formans | Yes | 0.113<br>526 | 0.036<br>031 | 49 | 0 | 0.002<br>962 | 0.027<br>694 |
| LLETZ            | Shuttleworthia.satelles             | Yes | 0.113<br>526 | 0.036<br>031 | 49 | 0 | 0.002<br>962 | 0.027<br>694 |
| LLETZ            | SK.Y3.sp002252565                   | Yes | 0.113<br>526 | 0.036<br>031 | 49 | 0 | 0.002<br>962 | 0.027<br>694 |
| LLETZ            | Turicibacter.sanguinis              | Yes | 0.113<br>526 | 0.036<br>031 | 49 | 0 | 0.002<br>962 | 0.027<br>694 |
| Previous_<br>PTB | CAG.269.sp001916055                 | Yes | 0.233<br>089 | 0.074<br>454 | 49 | 0 | 0.003<br>132 | 0.029<br>226 |
| LLETZ            | CAG.452.sp000434035                 | Yes | 0.433<br>227 | 0.139<br>04  | 49 | 0 | 0.003<br>263 | 0.030<br>389 |
| LLETZ            | Veillonella.montpellier<br>ensis    | Yes | 0.181<br>225 | 0.058<br>214 | 49 | 0 | 0.003<br>288 | 0.030<br>564 |
| Delivery         | Aerococcus.christensen<br>i         | PTB | 0.654<br>685 | 0.213<br>594 | 49 | 0 | 0.003<br>751 | 0.034<br>802 |
| Delivery         | Bifidobacterium.vaginal<br>e_C      | PTB | 0.620<br>222 | 0.202<br>806 | 49 | 0 | 0.003<br>822 | 0.035<br>327 |
| Delivery         | Dialister.sp001553355               | PTB | 0.213<br>668 | 0.069<br>852 | 49 | 0 | 0.003<br>816 | 0.035<br>327 |
| LLETZ            | Eubacterium_I.ramulus               | Yes | 0.271<br>168 | 0.089<br>034 | 49 | 0 | 0.003<br>955 | 0.036<br>486 |

|                   |                                |                     |                  |              |    |   |              |              |
|-------------------|--------------------------------|---------------------|------------------|--------------|----|---|--------------|--------------|
| LLETZ             | Virgibacillus_G.profundus      | Yes                 | 0.516<br>555     | 0.169<br>831 | 49 | 0 | 0.004        | 0.036<br>825 |
| LLETZ             | Agathobacter.faecis            | Yes                 | 0.105<br>809     | 0.035<br>016 | 49 | 0 | 0.004<br>222 | 0.038<br>566 |
| LLETZ             | Agathobacter.rectale           | Yes                 | 0.105<br>809     | 0.035<br>016 | 49 | 0 | 0.004<br>222 | 0.038<br>566 |
| LLETZ             | Bacteroides.uniformis          | Yes                 | 0.105<br>809     | 0.035<br>016 | 49 | 0 | 0.004<br>222 | 0.038<br>566 |
| Previous_<br>PTB  | Helicobacter.pylori_C          | Yes                 | 0.294<br>939     | 0.097<br>624 | 49 | 0 | 0.004<br>228 | 0.038<br>566 |
| Delivery          | Finegoldia.magna_H             | PTB                 | 0.125<br>291     | 0.041<br>472 | 49 | 0 | 0.004<br>229 | 0.038<br>566 |
| Outcome_<br>group | Lactobacillus.taiwanensis      | no-<br>risk_P<br>TB | 2.619<br>815     | 0.873<br>129 | 49 | 0 | 0.004<br>472 | 0.040<br>708 |
| Risk_group        | Faecalibacterium.prausnitzii_H | Risk                | -<br>0.152<br>83 | 0.051<br>186 | 49 | 0 | 0.004<br>654 | 0.042<br>278 |
| LLETZ             | Parabacteroides.johnsonii      | Yes                 | 0.526<br>389     | 0.178<br>751 | 49 | 0 | 0.005<br>196 | 0.047<br>119 |
| Risk_group        | Blautia_A.sp900066145          | Risk                | -<br>0.260<br>3  | 0.088<br>459 | 49 | 0 | 0.005<br>227 | 0.047<br>305 |
| Delivery          | Prevotella.colorans            | PTB                 | 0.397<br>373     | 0.135<br>189 | 49 | 0 | 0.005<br>272 | 0.047<br>629 |
| Risk_group        | Prevotella.corporis            | Risk                | 0.287<br>219     | 0.097<br>75  | 49 | 0 | 0.005<br>288 | 0.047<br>678 |

|             |                                 |      |                  |              |    |   |              |              |
|-------------|---------------------------------|------|------------------|--------------|----|---|--------------|--------------|
| Risk_group  | Actinotignum.urinale            | Risk | -<br>0.146<br>25 | 0.049<br>805 | 49 | 0 | 0.005<br>315 | 0.047<br>835 |
| Risk_group  | UBA1033.sp001695555             | Risk | -<br>0.117<br>25 | 0.040<br>08  | 49 | 0 | 0.005<br>472 | 0.049<br>159 |
| Delivery    | Arcanobacterium_A.sp000758825   | PTB  | 0.049<br>648     | 0.017<br>256 | 49 | 0 | 0.006<br>223 | 0.051<br>307 |
| Delivery    | Atopobium.deltae                | PTB  | 0.049<br>648     | 0.017<br>256 | 49 | 0 | 0.006<br>223 | 0.051<br>307 |
| Delivery    | Bartonella.sp000278115          | PTB  | 0.049<br>648     | 0.017<br>256 | 49 | 0 | 0.006<br>223 | 0.051<br>307 |
| Previous_PT | Bifidobacterium.callitricidarum | Yes  | -<br>0.113<br>09 | 0.038<br>992 | 49 | 0 | 0.005<br>851 | 0.051<br>307 |
| Previous_PT | Bifidobacterium.myosotis        | Yes  | -<br>0.146<br>83 | 0.050<br>51  | 49 | 0 | 0.005<br>75  | 0.051<br>307 |
| Previous_PT | Bifidobacterium.reuteri         | Yes  | -<br>0.113<br>09 | 0.038<br>992 | 49 | 0 | 0.005<br>851 | 0.051<br>307 |
| LLETZ       | Bifidobacterium.scardovii       | Yes  | -<br>0.266<br>63 | 0.092<br>589 | 49 | 0 | 0.006<br>181 | 0.051<br>307 |
| Risk_group  | Bifidobacterium.scardovii       | Risk | 0.300<br>058     | 0.104<br>214 | 49 | 0 | 0.006<br>189 | 0.051<br>307 |
| Delivery    | Clostridium.gasigenes           | PTB  | 0.049<br>648     | 0.017<br>256 | 49 | 0 | 0.006<br>223 | 0.051<br>307 |
| LLETZ       | Cutibacterium.granulosum        | Yes  | 0.258            | 0.089        | 49 | 0 | 0.006        | 0.051        |

|          |                               |     |              |              |    |   |              |              |
|----------|-------------------------------|-----|--------------|--------------|----|---|--------------|--------------|
|          | um                            |     | 735          | 862          |    |   | 189          | 307          |
| Delivery | Dubosiella.sp000403415        | PTB | 0.049<br>648 | 0.017<br>256 | 49 | 0 | 0.006<br>223 | 0.051<br>307 |
| Delivery | Facklamia.languida            | PTB | 0.049<br>648 | 0.017<br>256 | 49 | 0 | 0.006<br>223 | 0.051<br>307 |
| Delivery | Fusobacterium_C.necrophorum   | PTB | 0.049<br>648 | 0.017<br>256 | 49 | 0 | 0.006<br>223 | 0.051<br>307 |
| Delivery | GWA2.31.9.sp001768155         | PTB | 0.049<br>648 | 0.017<br>256 | 49 | 0 | 0.006<br>223 | 0.051<br>307 |
| Delivery | Histophilus.somni             | PTB | 0.049<br>648 | 0.017<br>256 | 49 | 0 | 0.006<br>223 | 0.051<br>307 |
| Delivery | KA00274.sp001552885           | PTB | 0.049<br>648 | 0.017<br>256 | 49 | 0 | 0.006<br>223 | 0.051<br>307 |
| Delivery | Metamycoplasma.hominis        | PTB | 0.049<br>648 | 0.017<br>256 | 49 | 0 | 0.006<br>223 | 0.051<br>307 |
| Delivery | Peptoanaerobacter.stomatidis  | PTB | 0.049<br>648 | 0.017<br>256 | 49 | 0 | 0.006<br>223 | 0.051<br>307 |
| Delivery | PGYU01.sp002839825            | PTB | 0.049<br>648 | 0.017<br>256 | 49 | 0 | 0.006<br>223 | 0.051<br>307 |
| Delivery | Porphyromonas.asaccharolytica | PTB | 0.049<br>648 | 0.017<br>256 | 49 | 0 | 0.006<br>223 | 0.051<br>307 |
| Delivery | Porphyromonas.gingivalis      | PTB | 0.049<br>648 | 0.017<br>256 | 49 | 0 | 0.006<br>223 | 0.051<br>307 |
| Delivery | Porphyromonas.somerae         | PTB | 0.049<br>648 | 0.017<br>256 | 49 | 0 | 0.006<br>223 | 0.051<br>307 |
| Delivery | Porphyromonas.uenonis         | PTB | 0.049<br>648 | 0.017<br>256 | 49 | 0 | 0.006<br>223 | 0.051<br>307 |

|          |                                      |     |              |              |    |   |              |              |
|----------|--------------------------------------|-----|--------------|--------------|----|---|--------------|--------------|
| Delivery | <i>Porphyromonas.uenonis</i><br>_A   | PTB | 0.049<br>648 | 0.017<br>256 | 49 | 0 | 0.006<br>223 | 0.051<br>307 |
| Delivery | <i>Prevotella.amnii</i>              | PTB | 0.049<br>648 | 0.017<br>256 | 49 | 0 | 0.006<br>223 | 0.051<br>307 |
| Delivery | <i>Prevotella.denticola</i>          | PTB | 0.049<br>648 | 0.017<br>256 | 49 | 0 | 0.006<br>223 | 0.051<br>307 |
| Delivery | <i>Prevotella.enoecca</i>            | PTB | 0.049<br>648 | 0.017<br>256 | 49 | 0 | 0.006<br>223 | 0.051<br>307 |
| Delivery | <i>Prevotella.histicola</i>          | PTB | 0.049<br>648 | 0.017<br>256 | 49 | 0 | 0.006<br>223 | 0.051<br>307 |
| Delivery | <i>Prevotella.ihumii</i>             | PTB | 0.049<br>648 | 0.017<br>256 | 49 | 0 | 0.006<br>223 | 0.051<br>307 |
| Delivery | <i>Prevotella.intermedia</i>         | PTB | 0.049<br>648 | 0.017<br>256 | 49 | 0 | 0.006<br>223 | 0.051<br>307 |
| Delivery | <i>Prevotella.melaninogeni</i><br>ca | PTB | 0.049<br>648 | 0.017<br>256 | 49 | 0 | 0.006<br>223 | 0.051<br>307 |
| Delivery | <i>Prevotella.nanceiensis</i>        | PTB | 0.049<br>648 | 0.017<br>256 | 49 | 0 | 0.006<br>223 | 0.051<br>307 |
| Delivery | <i>Prevotella.nigrescens</i>         | PTB | 0.049<br>648 | 0.017<br>256 | 49 | 0 | 0.006<br>223 | 0.051<br>307 |
| Delivery | <i>Prevotella.oris</i>               | PTB | 0.049<br>648 | 0.017<br>256 | 49 | 0 | 0.006<br>223 | 0.051<br>307 |
| Delivery | <i>Prevotella.oulorum</i>            | PTB | 0.049<br>648 | 0.017<br>256 | 49 | 0 | 0.006<br>223 | 0.051<br>307 |
| Delivery | <i>Prevotella.pallens</i>            | PTB | 0.049<br>648 | 0.017<br>256 | 49 | 0 | 0.006<br>223 | 0.051<br>307 |



|                  |                           |     |              |              |    |   |              |              |
|------------------|---------------------------|-----|--------------|--------------|----|---|--------------|--------------|
| Delivery         | Prevotella.pleuritidis    | PTB | 0.049<br>648 | 0.017<br>256 | 49 | 0 | 0.006<br>223 | 0.051<br>307 |
| Delivery         | Prevotella.scopos         | PTB | 0.049<br>648 | 0.017<br>256 | 49 | 0 | 0.006<br>223 | 0.051<br>307 |
| Delivery         | Prevotella.sp000163055    | PTB | 0.049<br>648 | 0.017<br>256 | 49 | 0 | 0.006<br>223 | 0.051<br>307 |
| Delivery         | Prevotella.sp000758925    | PTB | 0.049<br>648 | 0.017<br>256 | 49 | 0 | 0.006<br>223 | 0.051<br>307 |
| Delivery         | Prevotella.sp001552765    | PTB | 0.049<br>648 | 0.017<br>256 | 49 | 0 | 0.006<br>223 | 0.051<br>307 |
| Delivery         | Prevotella.sp001553265    | PTB | 0.049<br>648 | 0.017<br>256 | 49 | 0 | 0.006<br>223 | 0.051<br>307 |
| Delivery         | Prevotella.sp002251295    | PTB | 0.049<br>648 | 0.017<br>256 | 49 | 0 | 0.006<br>223 | 0.051<br>307 |
| Delivery         | Prevotella.sp003043945    | PTB | 0.049<br>648 | 0.017<br>256 | 49 | 0 | 0.006<br>223 | 0.051<br>307 |
| Delivery         | Prevotella.sp900199655    | PTB | 0.049<br>648 | 0.017<br>256 | 49 | 0 | 0.006<br>223 | 0.051<br>307 |
| Delivery         | Streptococcus.equi        | PTB | 0.049<br>648 | 0.017<br>256 | 49 | 0 | 0.006<br>223 | 0.051<br>307 |
| Delivery         | Streptococcus.pyogenes    | PTB | 0.049<br>648 | 0.017<br>256 | 49 | 0 | 0.006<br>223 | 0.051<br>307 |
| Delivery         | Tenacibaculum.agarivorans | PTB | 0.049<br>648 | 0.017<br>256 | 49 | 0 | 0.006<br>223 | 0.051<br>307 |
| Previous_<br>PTB | Alistipes.finegoldii      | Yes | 0.166<br>301 | 0.058<br>094 | 49 | 0 | 0.006<br>467 | 0.053<br>23  |

|                   |                                  |                     |                  |              |    |   |              |              |
|-------------------|----------------------------------|---------------------|------------------|--------------|----|---|--------------|--------------|
| LLETZ             | Desulfuromonas_D.acet<br>exigens | Yes                 | 0.524<br>241     | 0.183<br>254 | 49 | 0 | 0.006<br>5   | 0.053<br>407 |
| LLETZ             | Eubacterium_F.xylanop<br>hilum   | Yes                 | 0.253<br>93      | 0.088<br>792 | 49 | 0 | 0.006<br>515 | 0.053<br>443 |
| Outcome_<br>group | Ureaplasma.parvum                | no-<br>risk_P<br>TB | 1.561<br>247     | 0.548<br>489 | 49 | 0 | 0.006<br>749 | 0.055<br>269 |
| LLETZ             | UBA1033.sp001695555              | Yes                 | 0.100<br>83      | 0.035<br>609 | 49 | 0 | 0.007<br>018 | 0.057<br>371 |
| Outcome_<br>group | Fannyhessea.vaginae              | no-<br>risk_P<br>TB | 1.371<br>393     | 0.485<br>163 | 49 | 0 | 0.007<br>11  | 0.058<br>024 |
| Delivery          | Prevotella.corporis              | PTB                 | 0.172<br>711     | 0.061<br>521 | 49 | 0 | 0.007<br>479 | 0.060<br>933 |
| Previous_<br>PTB  | CAG.45.sp900066395               | Yes                 | 0.227<br>589     | 0.081<br>138 | 49 | 0 | 0.007<br>526 | 0.061<br>112 |
| Risk_grou<br>p    | Helicobacter.pylori              | Risk                | -<br>0.168<br>62 | 0.060<br>11  | 49 | 0 | 0.007<br>522 | 0.061<br>112 |
| LLETZ             | Prevotella.copri                 | Yes                 | 0.127<br>688     | 0.045<br>87  | 49 | 0 | 0.007<br>956 | 0.064<br>383 |
| LLETZ             | Slackia_A.piriformis             | Yes                 | 0.127<br>688     | 0.045<br>87  | 49 | 0 | 0.007<br>956 | 0.064<br>383 |
| Risk_grou<br>p    | CAG.110.sp003525905              | Risk                | -<br>0.221<br>46 | 0.080<br>099 | 49 | 0 | 0.008<br>356 | 0.067<br>51  |
| Delivery          | Empedobacter.falsenii            | PTB                 | 0.088<br>986     | 0.032<br>21  | 49 | 0 | 0.008<br>401 | 0.067<br>76  |

|          |                                      |     |                  |              |    |   |              |              |
|----------|--------------------------------------|-----|------------------|--------------|----|---|--------------|--------------|
| LLETZ    | Ruminococcus_C.sp000<br>433635       | Yes | 0.434<br>554     | 0.159<br>298 | 49 | 0 | 0.009<br>192 | 0.073<br>887 |
| Delivery | Gemella_A.asaccharolyt<br>ica        | PTB | 0.164<br>245     | 0.060<br>203 | 49 | 0 | 0.009<br>186 | 0.073<br>887 |
| LLETZ    | Ruminococcus_E.bromi<br>i_B          | Yes | 0.307<br>9       | 0.113<br>287 | 49 | 0 | 0.009<br>433 | 0.075<br>697 |
| LLETZ    | Amphibacillus.xylandus               | Yes | 0.091<br>696     | 0.033<br>751 | 49 | 0 | 0.009<br>458 | 0.075<br>773 |
| LLETZ    | Clostridium_H.botulinu<br>m_A        | Yes | 0.180<br>382     | 0.066<br>431 | 49 | 0 | 0.009<br>494 | 0.075<br>937 |
| LLETZ    | Chryseobacterium.oncor<br>hynchi     | Yes | 0.418<br>288     | 0.154<br>422 | 49 | 0 | 0.009<br>657 | 0.076<br>981 |
| LLETZ    | Alistipes.finegoldii                 | Yes | 0.151<br>291     | 0.055<br>848 | 49 | 0 | 0.009<br>65  | 0.076<br>981 |
| Delivery | Prevotella.disiens                   | PTB | 0.230<br>797     | 0.085<br>797 | 49 | 0 | 0.010<br>131 | 0.080<br>626 |
| LLETZ    | Bifidobacterium.callitric<br>hidarum | Yes | -<br>0.100<br>21 | 0.037<br>485 | 49 | 0 | 0.010<br>574 | 0.083<br>86  |
| LLETZ    | Bifidobacterium.reuteri              | Yes | -<br>0.100<br>21 | 0.037<br>485 | 49 | 0 | 0.010<br>574 | 0.083<br>86  |
| LLETZ    | UBA690.sp003487005                   | Yes | 0.129<br>609     | 0.048<br>494 | 49 | 0 | 0.010<br>589 | 0.083<br>86  |
| LLETZ    | Alistipes.obesi                      | Yes | 0.276<br>505     | 0.103<br>628 | 49 | 0 | 0.010<br>71  | 0.084<br>583 |
| LLETZ    | Erysipelatoclostridium.s             | Yes | 0.256            | 0.096        | 49 | 0 | 0.010        | 0.084        |

|              |                              |      |                  |              |    |   |              |              |
|--------------|------------------------------|------|------------------|--------------|----|---|--------------|--------------|
|              | p003024675                   |      | 82               | 259          |    |   | 716          | 583          |
| Risk_group   | HRBIN23.sp002923335          | Risk | -<br>0.334<br>56 | 0.126<br>738 | 49 | 0 | 0.011<br>512 | 0.090<br>721 |
| LLETZ        | CAG.217.sp000436335          | Yes  | 0.292<br>325     | 0.110<br>867 | 49 | 0 | 0.011<br>601 | 0.091<br>276 |
| Delivery     | Stomatobaculum.sp002892395   | PTB  | 0.229<br>072     | 0.087<br>068 | 49 | 0 | 0.011<br>772 | 0.092<br>468 |
| Delivery     | Bifidobacterium.vaginale_D   | PTB  | 0.344<br>719     | 0.131<br>974 | 49 | 0 | 0.012<br>347 | 0.096<br>829 |
| LLETZ        | Empedobacter.falsenii        | Yes  | 0.118<br>18      | 0.045<br>468 | 49 | 0 | 0.012<br>752 | 0.099<br>84  |
| LLETZ        | Staphylococcus_A.sciurii     | Yes  | 0.111<br>931     | 0.043<br>112 | 49 | 0 | 0.012<br>844 | 0.100<br>398 |
| LLETZ        | Micrococcus.luteus           | Yes  | 0.145<br>994     | 0.056<br>267 | 49 | 0 | 0.012<br>898 | 0.100<br>651 |
| Risk_group   | Caloramator.mitchellensis    | Risk | -<br>0.374<br>76 | 0.145<br>14  | 49 | 0 | 0.013<br>311 | 0.103<br>712 |
| Previous_PTB | Amphibacillus.xylanus        | Yes  | 0.090<br>078     | 0.035<br>109 | 49 | 0 | 0.013<br>865 | 0.107<br>855 |
| Previous_PTB | Tepidimonas.taiwanensis      | Yes  | 0.093<br>685     | 0.036<br>543 | 49 | 0 | 0.013<br>934 | 0.108<br>213 |
| Previous_PTB | Coraliomargarita.akajimensis | Yes  | 0.195<br>43      | 0.076<br>275 | 49 | 0 | 0.013<br>988 | 0.108<br>46  |
| LLETZ        | Prevotella.sp001275135       | Yes  | 0.427<br>682     | 0.167<br>371 | 49 | 0 | 0.014<br>229 | 0.109<br>975 |

|               |                                  |            |          |          |    |   |          |          |
|---------------|----------------------------------|------------|----------|----------|----|---|----------|----------|
| Previous_PT   | Eubacterium_F.xylanophilum       | Yes        | 0.236054 | 0.092363 | 49 | 0 | 0.014214 | 0.109975 |
| LLETZ         | Prevotella.sp002350805           | Yes        | 0.261989 | 0.103149 | 49 | 0 | 0.014783 | 0.114074 |
| Previous_PT   | CAG.217.sp000436335              | Yes        | 0.292365 | 0.115325 | 49 | 0 | 0.014959 | 0.115248 |
| Risk_group    | Bilophila.wadsworthia            | Risk       | -0.16969 | 0.066997 | 49 | 0 | 0.015046 | 0.115543 |
| Risk_group    | Pseudoflavonifractor.sp900079765 | Risk       | -0.16969 | 0.066997 | 49 | 0 | 0.015046 | 0.115543 |
| Outcome_group | Ureaplasma.urealyticum           | no-risk_TB | 0.386234 | 0.153387 | 49 | 0 | 0.015605 | 0.119645 |
| LLETZ         | Tepidimonas.taiwanensis          | Yes        | 0.088058 | 0.03513  | 49 | 0 | 0.016049 | 0.122853 |
| Outcome_group | Bifidobacterium.longum           | no-risk_TB | 1.869065 | 0.74654  | 49 | 0 | 0.016168 | 0.123569 |
| Risk_group    | Staphylococcus.capitis           | Risk       | -0.23127 | 0.092719 | 49 | 0 | 0.016544 | 0.126246 |
| Risk_group    | Helicobacter.pylori_C            | Risk       | -0.26333 | 0.105634 | 49 | 0 | 0.016602 | 0.126486 |
| LLETZ         | Anaerostipes.hadrus              | Yes        | 0.222979 | 0.089595 | 49 | 0 | 0.01677  | 0.127561 |
| LLETZ         | Lactococcus.lactis_E             | Yes        | 0.201    | 0.081    | 49 | 0 | 0.016    | 0.127    |

|                  |                             |      |                  |              |    |   |              |              |
|------------------|-----------------------------|------|------------------|--------------|----|---|--------------|--------------|
|                  |                             |      | 673              | 085          |    |   | 835          | 852          |
| Previous_<br>PTB | CAG.196.sp002102975         | Yes  | 0.204<br>649     | 0.082<br>324 | 49 | 0 | 0.016<br>887 | 0.128<br>052 |
| Risk_grou<br>p   | CAG.269.sp001916055         | Risk | -<br>0.199<br>56 | 0.080<br>562 | 49 | 0 | 0.017<br>257 | 0.130<br>646 |
| LLETZ            | Bacillus_F.enclensis        | Yes  | 0.477<br>174     | 0.192<br>805 | 49 | 0 | 0.017<br>347 | 0.131<br>123 |
| Delivery         | Eubacterium_B.sulci         | PTB  | 0.077<br>901     | 0.031<br>517 | 49 | 0 | 0.017<br>483 | 0.131<br>948 |
| Risk_grou<br>p   | Peptoniphilus_E.obesi       | Risk | -<br>0.128<br>64 | 0.052<br>221 | 49 | 0 | 0.017<br>847 | 0.134<br>478 |
| Previous_<br>PTB | Ruminococcus_E.bromi<br>i_B | Yes  | 0.290<br>014     | 0.117<br>843 | 49 | 0 | 0.017<br>945 | 0.135<br>006 |
| Risk_grou<br>p   | Faecalicatena.lactaris      | Risk | -<br>0.286<br>54 | 0.116<br>579 | 49 | 0 | 0.018<br>08  | 0.135<br>809 |
| Previous_<br>PTB | Bifidobacterium.breve       | Yes  | -<br>1.814<br>9  | 0.739<br>335 | 49 | 0 | 0.018<br>219 | 0.136<br>611 |
| Previous_<br>PTB | UBA1033.sp001695555         | Yes  | 0.090<br>907     | 0.037<br>041 | 49 | 0 | 0.018<br>243 | 0.136<br>611 |
| Delivery         | Fannyhessea.vaginae         | PTB  | 0.458<br>525     | 0.187<br>032 | 49 | 0 | 0.018<br>361 | 0.137<br>278 |
| Risk_grou<br>p   | Alistipes.finegoldii        | Risk | -<br>0.153<br>81 | 0.062<br>86  | 49 | 0 | 0.018<br>576 | 0.138<br>671 |

|            |                              |      |          |          |    |   |          |          |
|------------|------------------------------|------|----------|----------|----|---|----------|----------|
| LLETZ      | UBA7862.sp002500135          | Yes  | 0.46078  | 0.189902 | 49 | 0 | 0.019516 | 0.142708 |
| Risk_group | X32.111.sp001508335          | Risk | -0.09808 | 0.040555 | 49 | 0 | 0.019893 | 0.142708 |
| Delivery   | X4484.107.sp002059205        | PTB  | 0.044031 | 0.018284 | 49 | 0 | 0.020391 | 0.142708 |
| Risk_group | Akkermansia.sp001580195      | Risk | -0.09808 | 0.040555 | 49 | 0 | 0.019893 | 0.142708 |
| Risk_group | Alistipes_A.sp900240235      | Risk | -0.09808 | 0.040555 | 49 | 0 | 0.019893 | 0.142708 |
| Risk_group | Anaerosporobacter.mobilis    | Risk | -0.09808 | 0.040555 | 49 | 0 | 0.019893 | 0.142708 |
| Delivery   | Bacillus_W.sp002585305       | PTB  | 0.044031 | 0.018284 | 49 | 0 | 0.020391 | 0.142708 |
| LLETZ      | Bacteroides.cellulosilyticus | Yes  | 0.478769 | 0.198167 | 49 | 0 | 0.020012 | 0.142708 |
| Risk_group | Bifidobacterium.animalis     | Risk | -0.09808 | 0.040555 | 49 | 0 | 0.019893 | 0.142708 |
| Risk_group | CAG.313.sp003539625          | Risk | -0.09808 | 0.040555 | 49 | 0 | 0.019893 | 0.142708 |
| Delivery   | CAG.590.sp003530125          | PTB  | 0.0565   | 0.023353 | 49 | 0 | 0.019852 | 0.142708 |
| Delivery   | CAG.791.sp900317475          | PTB  | 0.044    | 0.018    | 49 | 0 | 0.020    | 0.142    |

|            |                                       |      |                  |              |    |   |              |              |
|------------|---------------------------------------|------|------------------|--------------|----|---|--------------|--------------|
|            |                                       |      | 031              | 284          |    |   | 391          | 708          |
| Delivery   | <i>Cetobacterium.ceti</i>             | PTB  | 0.044<br>031     | 0.018<br>284 | 49 | 0 | 0.020<br>391 | 0.142<br>708 |
| Delivery   | <i>Chitinophaga.niastensis</i>        | PTB  | 0.044<br>031     | 0.018<br>284 | 49 | 0 | 0.020<br>391 | 0.142<br>708 |
| Risk_group | <i>Eubacterium_F.sp000687695</i>      | Risk | -<br>0.098<br>08 | 0.040<br>555 | 49 | 0 | 0.019<br>893 | 0.142<br>708 |
| Delivery   | <i>Ezakiella.peruensis</i>            | PTB  | 0.044<br>031     | 0.018<br>284 | 49 | 0 | 0.020<br>391 | 0.142<br>708 |
| Risk_group | <i>Faecalibacterium.prausnitzii_K</i> | Risk | -<br>0.098<br>08 | 0.040<br>555 | 49 | 0 | 0.019<br>893 | 0.142<br>708 |
| Risk_group | <i>Faecalicatena.faecis</i>           | Risk | -<br>0.098<br>08 | 0.040<br>555 | 49 | 0 | 0.019<br>893 | 0.142<br>708 |
| Delivery   | <i>Fibrobacter.sp900215325</i>        | PTB  | 0.044<br>031     | 0.018<br>284 | 49 | 0 | 0.020<br>391 | 0.142<br>708 |
| LLETZ      | <i>JB111.sp900163555</i>              | Yes  | 0.174<br>178     | 0.072<br>13  | 49 | 0 | 0.020<br>071 | 0.142<br>708 |
| Delivery   | <i>Lactobacillus.sp002417825</i>      | PTB  | 0.044<br>031     | 0.018<br>284 | 49 | 0 | 0.020<br>391 | 0.142<br>708 |
| Delivery   | <i>Lancefieldella.rimae</i>           | PTB  | 0.044<br>031     | 0.018<br>284 | 49 | 0 | 0.020<br>391 | 0.142<br>708 |
| Delivery   | <i>Lancefieldella.sp000564995</i>     | PTB  | 0.044<br>031     | 0.018<br>284 | 49 | 0 | 0.020<br>391 | 0.142<br>708 |
| Delivery   | <i>Maribacter.orientalis</i>          | PTB  | 0.044<br>031     | 0.018<br>284 | 49 | 0 | 0.020<br>391 | 0.142<br>708 |



|            |                                    |      |                  |              |    |   |              |              |
|------------|------------------------------------|------|------------------|--------------|----|---|--------------|--------------|
| Delivery   | Mesorhizobium.sp0022<br>94725      | PTB  | 0.044<br>031     | 0.018<br>284 | 49 | 0 | 0.020<br>391 | 0.142<br>708 |
| Risk_group | Neoehrlichia.lotoris               | Risk | -<br>0.098<br>08 | 0.040<br>555 | 49 | 0 | 0.019<br>893 | 0.142<br>708 |
| Risk_group | Oscillibacter.ruminantium          | Risk | -<br>0.098<br>08 | 0.040<br>555 | 49 | 0 | 0.019<br>893 | 0.142<br>708 |
| Risk_group | Oscillibacter.sp0004034<br>35      | Risk | -<br>0.166<br>71 | 0.069<br>201 | 49 | 0 | 0.020<br>351 | 0.142<br>708 |
| Delivery   | Peptostreptococcus.sp0<br>00758885 | PTB  | 0.044<br>031     | 0.018<br>284 | 49 | 0 | 0.020<br>391 | 0.142<br>708 |
| Delivery   | Prevotella.aurantiaca              | PTB  | 0.044<br>031     | 0.018<br>284 | 49 | 0 | 0.020<br>391 | 0.142<br>708 |
| Risk_group | QALS01.sp003150575                 | Risk | -<br>0.098<br>08 | 0.040<br>555 | 49 | 0 | 0.019<br>893 | 0.142<br>708 |
| Risk_group | Raoultella.planticola              | Risk | -<br>0.098<br>08 | 0.040<br>555 | 49 | 0 | 0.019<br>893 | 0.142<br>708 |
| Risk_group | Rikenella.microfusus               | Risk | -<br>0.098<br>08 | 0.040<br>555 | 49 | 0 | 0.019<br>893 | 0.142<br>708 |
| Risk_group | Ruminococcus_E.bromii              | Risk | -<br>0.098<br>08 | 0.040<br>555 | 49 | 0 | 0.019<br>893 | 0.142<br>708 |
| Risk_group | Ruthenibacterium.lactatiformans    | Risk | -<br>0.098<br>08 | 0.040<br>555 | 49 | 0 | 0.019<br>893 | 0.142<br>708 |

|             |                                         |      |                  |              |    |   |              |              |
|-------------|-----------------------------------------|------|------------------|--------------|----|---|--------------|--------------|
| Delivery    | <i>Scardovia.wiggisiae</i>              | PTB  | 0.044<br>031     | 0.018<br>284 | 49 | 0 | 0.020<br>391 | 0.142<br>708 |
| Risk_group  | <i>Shuttleworthia.satelles</i>          | Risk | -<br>0.098<br>08 | 0.040<br>555 | 49 | 0 | 0.019<br>893 | 0.142<br>708 |
| Risk_group  | SK.Y3.sp002252565                       | Risk | -<br>0.098<br>08 | 0.040<br>555 | 49 | 0 | 0.019<br>893 | 0.142<br>708 |
| Delivery    | <i>Streptococcus.infantarius</i>        | PTB  | 0.044<br>031     | 0.018<br>284 | 49 | 0 | 0.020<br>391 | 0.142<br>708 |
| Delivery    | <i>Streptococcus.pseudopneumoniae_L</i> | PTB  | 0.044<br>031     | 0.018<br>284 | 49 | 0 | 0.020<br>391 | 0.142<br>708 |
| Risk_group  | <i>Turicibacter.sanguinis</i>           | Risk | -<br>0.098<br>08 | 0.040<br>555 | 49 | 0 | 0.019<br>893 | 0.142<br>708 |
| Delivery    | <i>Veillonella.parvula_A</i>            | PTB  | 0.044<br>031     | 0.018<br>284 | 49 | 0 | 0.020<br>391 | 0.142<br>708 |
| Delivery    | W5053.sp000467935                       | PTB  | 0.044<br>031     | 0.018<br>284 | 49 | 0 | 0.020<br>391 | 0.142<br>708 |
| Previous_PT | <i>Caecibacter.massiliensis</i>         | Yes  | 0.201<br>767     | 0.084<br>241 | 49 | 0 | 0.021<br>042 | 0.147<br>051 |
| Risk_group  | <i>Amphibacillus.xylophilus</i>         | Risk | -<br>0.090<br>6  | 0.037<br>989 | 49 | 0 | 0.021<br>566 | 0.150<br>492 |
| Previous_PT | <i>Prevotella.sp001275135</i>           | Yes  | 0.414<br>764     | 0.174<br>102 | 49 | 0 | 0.021<br>698 | 0.151<br>192 |
| Delivery    | <i>Bifidobacterium.bifidum</i>          | PTB  | 0.270<br>573     | 0.113<br>951 | 49 | 0 | 0.022<br>108 | 0.153<br>83  |

|               |                                  |             |          |          |    |   |          |          |
|---------------|----------------------------------|-------------|----------|----------|----|---|----------|----------|
| Risk_group    | Stenotrophomonas.maltophilia_AM  | Risk        | -0.37861 | 0.159505 | 49 | 0 | 0.022151 | 0.153904 |
| Previous_PT   | Bifidobacterium.infantis         | Yes         | -0.5684  | 0.239855 | 49 | 0 | 0.022356 | 0.155108 |
| Outcome_group | Lactobacillus.johnsonii          | no-risk_PTB | 1.973156 | 0.835039 | 49 | 0 | 0.022723 | 0.157425 |
| Risk_group    | Streptococcus.pneumoniae_C       | Risk        | -0.13198 | 0.056129 | 49 | 0 | 0.023352 | 0.161552 |
| Risk_group    | CAG.45.sp900066395               | Risk        | -0.2054  | 0.087796 | 49 | 0 | 0.024023 | 0.165958 |
| LLETZ         | Alloprevotella.rava              | Yes         | 0.482313 | 0.206303 | 49 | 0 | 0.024115 | 0.166351 |
| Outcome_group | Helicobacter.pylori_C            | no-risk_PTB | 0.402228 | 0.172458 | 49 | 0 | 0.024434 | 0.168313 |
| LLETZ         | Dethiosulfatibacter.amionovorans | Yes         | 0.486204 | 0.208758 | 49 | 0 | 0.024625 | 0.169385 |
| Risk_group    | Agathobacter.faecis              | Risk        | -0.09132 | 0.039413 | 49 | 0 | 0.025334 | 0.173271 |
| Risk_group    | Agathobacter.rectale             | Risk        | -0.09132 | 0.039413 | 49 | 0 | 0.025334 | 0.173271 |
| Risk_group    | Bacteroides.uniformis            | Risk        | -0.09132 | 0.039413 | 49 | 0 | 0.025334 | 0.173271 |

|                  |                                        |      |                  |              |    |   |              |              |
|------------------|----------------------------------------|------|------------------|--------------|----|---|--------------|--------------|
| Previous_<br>PTB | Desulfuromonas_D.acet<br>exigens       | Yes  | 0.441<br>684     | 0.190<br>624 | 49 | 0 | 0.025<br>331 | 0.173<br>271 |
| Previous_<br>PTB | Eubacterium_I.ramulus                  | Yes  | 0.214<br>291     | 0.092<br>614 | 49 | 0 | 0.025<br>524 | 0.174<br>325 |
| Previous_<br>PTB | Lactobacillus_C.rhamn<br>osus          | Yes  | 0.584<br>448     | 0.253<br>828 | 49 | 0 | 0.026<br>209 | 0.178<br>613 |
| LLETZ            | Peptoniphilus_E.obesi                  | Yes  | 0.106<br>814     | 0.046<br>396 | 49 | 0 | 0.026<br>226 | 0.178<br>613 |
| Risk_grou<br>p   | Bifidobacterium.myosot<br>is           | Risk | 0.125<br>764     | 0.054<br>655 | 49 | 0 | 0.026<br>299 | 0.178<br>853 |
| LLETZ            | Faecalibacterium.prausn<br>itzii_I     | Yes  | 0.305<br>765     | 0.133<br>079 | 49 | 0 | 0.026<br>512 | 0.180<br>052 |
| Risk_grou<br>p   | Bifidobacterium.breve                  | Risk | 1.835<br>733     | 0.799<br>995 | 49 | 0 | 0.026<br>695 | 0.181<br>039 |
| Previous_<br>PTB | Erysipelatoclostridium.s<br>p003024675 | Yes  | 0.229<br>171     | 0.100<br>13  | 49 | 0 | 0.027<br>069 | 0.183<br>316 |
| LLETZ            | Intestinibacter.bartlettii             | Yes  | 0.365<br>722     | 0.162<br>448 | 49 | 0 | 0.029<br>53  | 0.199<br>702 |
| LLETZ            | Photobacterium.sanguin<br>icancri      | Yes  | 0.212<br>867     | 0.094<br>76  | 49 | 0 | 0.029<br>869 | 0.201<br>711 |
| Delivery         | Lactobacillus.crispatus                | PTB  | -<br>1.647<br>96 | 0.734<br>709 | 49 | 0 | 0.030<br>103 | 0.203<br>007 |
| Delivery         | Lactobacillus.johnsonii                | PTB  | -<br>0.717<br>69 | 0.321<br>91  | 49 | 0 | 0.031<br>057 | 0.208<br>856 |
| LLETZ            | Coprococcus.eutactus_                  | Yes  | 0.435            | 0.195        | 49 | 0 | 0.031        | 0.208        |

|                  |                                              |      |                  |              |    |   |              |              |
|------------------|----------------------------------------------|------|------------------|--------------|----|---|--------------|--------------|
|                  | A                                            |      | 236              | 214          |    |   | 054          | 856          |
| LLETZ            | <i>Duncaniella.muris</i>                     | Yes  | 0.430<br>356     | 0.193<br>506 | 49 | 0 | 0.031<br>452 | 0.211<br>213 |
| Risk_group       | <i>Bifidobacterium.callitric<br/>hidarum</i> | Risk | 0.093<br>547     | 0.042<br>191 | 49 | 0 | 0.031<br>945 | 0.213<br>929 |
| Risk_group       | <i>Bifidobacterium.reuteri</i>               | Risk | 0.093<br>547     | 0.042<br>191 | 49 | 0 | 0.031<br>945 | 0.213<br>929 |
| LLETZ            | <i>Oscillibacter.sp9001156<br/>35</i>        | Yes  | 0.377<br>501     | 0.171<br>25  | 49 | 0 | 0.032<br>898 | 0.220<br>007 |
| LLETZ            | <i>Cronobacter.sakazakii</i>                 | Yes  | 0.536<br>466     | 0.243<br>437 | 49 | 0 | 0.032<br>948 | 0.220<br>036 |
| Previous_PT<br>B | <i>Virgibacillus_G.profun<br/>di</i>         | Yes  | 0.388<br>729     | 0.176<br>661 | 49 | 0 | 0.033<br>197 | 0.221<br>391 |
| Risk_group       | <i>Cutibacterium.granulos<br/>um</i>         | Risk | -<br>0.221<br>83 | 0.101<br>145 | 49 | 0 | 0.033<br>75  | 0.224<br>768 |
| Risk_group       | <i>Empedobacter.falsenii</i>                 | Risk | -<br>0.111<br>98 | 0.051<br>177 | 49 | 0 | 0.034<br>143 | 0.227<br>067 |
| Delivery         | <i>Lactobacillus.gasseri</i>                 | PTB  | -<br>1.199<br>99 | 0.549<br>206 | 49 | 0 | 0.034<br>389 | 0.228<br>393 |
| LLETZ            | <i>Odoribacter.splanchnicu<br/>s</i>         | Yes  | 0.454<br>874     | 0.209<br>268 | 49 | 0 | 0.035<br>285 | 0.233<br>745 |
| Risk_group       | <i>Coraliomargarita.akajim<br/>ensis</i>     | Risk | -<br>0.179<br>39 | 0.082<br>533 | 49 | 0 | 0.035<br>292 | 0.233<br>745 |
| LLETZ            | <i>Hungatella.celerecresce</i>               | Yes  | 0.203            | 0.093        | 49 | 0 | 0.035        | 0.233        |

|                   |                                  |                     |              |              |    |   |              |              |
|-------------------|----------------------------------|---------------------|--------------|--------------|----|---|--------------|--------------|
|                   | ns_B                             |                     | 738          | 775          |    |   | 365          | 907          |
| LLETZ             | Bacillus.halotolerans            | Yes                 | 0.151<br>587 | 0.069<br>935 | 49 | 0 | 0.035<br>777 | 0.236<br>305 |
| Previous_<br>PTB  | Prevotella.copri                 | Yes                 | 0.103<br>087 | 0.047<br>715 | 49 | 0 | 0.036<br>353 | 0.239<br>454 |
| Previous_<br>PTB  | Slackia_A.piriformis             | Yes                 | 0.103<br>087 | 0.047<br>715 | 49 | 0 | 0.036<br>353 | 0.239<br>454 |
| Delivery          | Streptococcus.sanguinis          | PTB                 | 0.090<br>926 | 0.042<br>31  | 49 | 0 | 0.037<br>302 | 0.245<br>37  |
| Previous_<br>PTB  | CAG.81.sp900066785               | Yes                 | 0.264<br>766 | 0.123<br>269 | 49 | 0 | 0.037<br>401 | 0.245<br>681 |
| Previous_<br>PTB  | Bacteroides.cellulosilyti<br>cus | Yes                 | 0.442<br>547 | 0.206<br>137 | 49 | 0 | 0.037<br>487 | 0.245<br>91  |
| Outcome_<br>group | Streptococcus.pyogenes<br>_A     | no-<br>risk_P<br>TB | 0.356<br>685 | 0.166<br>424 | 49 | 0 | 0.037<br>794 | 0.247<br>591 |
| LLETZ             | Streptococcus.pneumon<br>iae_C   | Yes                 | 0.106<br>814 | 0.049<br>867 | 49 | 0 | 0.037<br>901 | 0.247<br>955 |
| LLETZ             | Paraprevotella.clara             | Yes                 | 0.492<br>458 | 0.230<br>173 | 49 | 0 | 0.038<br>112 | 0.248<br>994 |
| Previous_<br>PTB  | Peptoniphilus_E.obesi            | Yes                 | 0.103<br>18  | 0.048<br>262 | 49 | 0 | 0.038<br>248 | 0.249<br>546 |

---

Supplementary Table 3 | MaAsLiN analysis of significant associations of gene ontology functions with sample groupings

| metadata                  | feature                                                                                 | value | coef    | stderr | pval   | qval   |
|---------------------------|-----------------------------------------------------------------------------------------|-------|---------|--------|--------|--------|
| <b>Molecular function</b> |                                                                                         |       |         |        |        |        |
| Delivery                  | [MF]receptor activity                                                                   | PTB   | 1.0311  | 0.2733 | 0.0005 | 0.1331 |
| Delivery                  | [MF]ferredoxin NADP reductase activity                                                  | PTB   | -2.3282 | 0.6451 | 0.0008 | 0.1332 |
| Delivery                  | [MF]2 3 bisphosphoglycerate independent phosphoglycerate mutase activity                | PTB   | 0.6209  | 0.2040 | 0.0040 | 0.1652 |
| Delivery                  | [MF]aldose 1 epimerase activity                                                         | PTB   | 0.6846  | 0.2129 | 0.0025 | 0.1652 |
| Delivery                  | [MF]carbohydrate transmembrane transporter activity                                     | PTB   | -1.9152 | 0.5667 | 0.0016 | 0.1652 |
| Delivery                  | [MF]carboxyl or carbamoyltransferase activity                                           | PTB   | 0.5346  | 0.1741 | 0.0037 | 0.1652 |
| Delivery                  | [MF]copper exporting ATPase activity                                                    | PTB   | 1.8530  | 0.6179 | 0.0045 | 0.1652 |
| Delivery                  | [MF]dihydroneopterin aldolase activity                                                  | PTB   | 0.7876  | 0.2518 | 0.0032 | 0.1652 |
| Delivery                  | [MF]fatty acid synthase activity                                                        | PTB   | 0.3188  | 0.1056 | 0.0043 | 0.1652 |
| Delivery                  | [MF]histidine ammonia lyase activity                                                    | PTB   | 0.4058  | 0.1318 | 0.0036 | 0.1652 |
| Delivery                  | [MF]hydrolase activity acting on carbon nitrogen but not peptide bonds in linear amides | PTB   | -1.7480 | 0.5867 | 0.0047 | 0.1652 |
| Delivery                  | [MF]isochorismate synthase activity                                                     | PTB   | 0.6178  | 0.1966 | 0.0030 | 0.1652 |
| Delivery                  | [MF]oxidized purine nucleobase lesion DNA N glycosylase activity                        | PTB   | -0.7326 | 0.2213 | 0.0019 | 0.1652 |
| Delivery                  | [MF]tRNA cytidyltransferase activity                                                    | PTB   | -1.7988 | 0.6007 | 0.0045 | 0.1652 |
| Delivery                  | [MF]oxidoreductase activity acting on NAD P H quinone or similar compound as acceptor   | PTB   | 0.6947  | 0.2339 | 0.0049 | 0.1658 |
| Delivery                  | [MF]histone acetyltransferase activity                                                  | PTB   | 0.3381  | 0.1149 | 0.0052 | 0.1665 |
| Delivery                  | [MF]amino acid transmembrane transporter activity                                       | PTB   | -0.2386 | 0.0818 | 0.0056 | 0.1671 |
| Delivery                  | [MF]beta phosphoglucomutase activity                                                    | PTB   | -0.7542 | 0.2631 | 0.0064 | 0.1671 |
| Delivery                  | [MF]D lactate dehydrogenase activity                                                    | PTB   | -0.9749 | 0.3401 | 0.0064 | 0.1671 |
| Delivery                  | [MF]monosaccharide transporting ATPase activity                                         | PTB   | 0.3059  | 0.1056 | 0.0059 | 0.1671 |
| Delivery                  | [MF]organic phosphonate transmembrane transporting ATPase activity                      | PTB   | -1.1617 | 0.4068 | 0.0066 | 0.1671 |

|          |                                                                        |     |         |        |        |        |
|----------|------------------------------------------------------------------------|-----|---------|--------|--------|--------|
| Delivery | [MF]pantoate beta alanine ligase activity                              | PTB | 0.5836  | 0.2083 | 0.0076 | 0.1719 |
| Delivery | [MF]1 deoxy D xylulose 5 phosphate synthase activity                   | PTB | -1.5307 | 0.5548 | 0.0085 | 0.1727 |
| Delivery | [MF]NADH dehydrogenase ubiquinone activity                             | PTB | 0.6738  | 0.2444 | 0.0085 | 0.1727 |
| Delivery | [MF]potassium ion transmembrane transporter activity                   | PTB | -0.6823 | 0.2466 | 0.0083 | 0.1727 |
| Delivery | [MF]GMP reductase activity                                             | PTB | -1.4396 | 0.5240 | 0.0087 | 0.1728 |
| Delivery | [MF]purine nucleobase transmembrane transporter activity               | PTB | -0.5632 | 0.2054 | 0.0089 | 0.1728 |
| Delivery | [MF]protein N PI phosphohistidine sugar phosphotransferase activity    | PTB | -0.2638 | 0.0968 | 0.0093 | 0.1745 |
| Delivery | [MF]oxo acid lyase activity                                            | PTB | 0.6760  | 0.2493 | 0.0096 | 0.1752 |
| Delivery | [MF]thiamine phosphate kinase activity                                 | PTB | 0.6114  | 0.2256 | 0.0096 | 0.1752 |
| Delivery | [MF]4 hydroxy 3 methylbut 2 en 1 yl diphosphate synthase activity      | PTB | 0.7625  | 0.2873 | 0.0111 | 0.1801 |
| Delivery | [MF]deoxyribonucleoside 5 monophosphate N glycosidase activity         | PTB | -0.5576 | 0.2100 | 0.0111 | 0.1801 |
| Delivery | [MF]nucleoside deoxyribosyltransferase activity                        | PTB | -0.5576 | 0.2100 | 0.0111 | 0.1801 |
| Delivery | [MF]transferase activity transferring pentosyl groups                  | PTB | 0.3570  | 0.1339 | 0.0108 | 0.1801 |
| Delivery | [MF]metal ion binding                                                  | PTB | 0.1058  | 0.0403 | 0.0120 | 0.1816 |
| Delivery | [MF]quinone binding                                                    | PTB | 0.5979  | 0.2292 | 0.0124 | 0.1823 |
| Delivery | [MF]uracil phosphoribosyltransferase activity                          | PTB | -0.1699 | 0.0650 | 0.0123 | 0.1823 |
| Delivery | [MF]adenosylmethionine 8 amino 7 oxononoate transaminase activity      | PTB | 0.5588  | 0.2162 | 0.0132 | 0.1837 |
| Delivery | [MF]GTP diphosphokinase activity                                       | PTB | 0.2749  | 0.1073 | 0.0140 | 0.1837 |
| Delivery | [MF]phosphorelay response regulator activity                           | PTB | 0.3933  | 0.1517 | 0.0130 | 0.1837 |
| Delivery | [MF]ribose 5 phosphate isomerase activity                              | PTB | -0.1176 | 0.0463 | 0.0148 | 0.1885 |
| Delivery | [MF]catalytic activity                                                 | PTB | 0.1694  | 0.0669 | 0.0151 | 0.1899 |
| Delivery | [MF]hydrogen ion transmembrane transporter activity                    | PTB | 0.6339  | 0.2511 | 0.0154 | 0.1912 |
| Delivery | [MF]cob I yrinic acid a c diamide adenosyltransferase activity         | PTB | 0.4868  | 0.1938 | 0.0159 | 0.1933 |
| Delivery | [MF]2 3 bisphosphoglycerate dependent phosphoglycerate mutase activity | PTB | -0.3120 | 0.1248 | 0.0163 | 0.1959 |



|          |                                                                       |     |         |        |        |        |
|----------|-----------------------------------------------------------------------|-----|---------|--------|--------|--------|
| Delivery | [MF]protein transmembrane transporter activity                        | PTB | 0.3915  | 0.1578 | 0.0171 | 0.2016 |
| Delivery | [MF]intramolecular transferase activity<br>phosphotransferases        | PTB | 1.4728  | 0.5948 | 0.0173 | 0.2028 |
| Delivery | [MF]glycerol 3 phosphate cytidyltransferase activity                  | PTB | -0.5993 | 0.2427 | 0.0176 | 0.2038 |
| Delivery | [MF]hydrolase activity acting on acid anhydrides                      | PTB | -1.4520 | 0.5919 | 0.0183 | 0.2068 |
| Delivery | [MF]magnesium ion transmembrane transporter<br>activity               | PTB | 0.5479  | 0.2228 | 0.0180 | 0.2068 |
| Delivery | [MF]ATP dependent 5 3 DNA helicase activity                           | PTB | 1.2697  | 0.5222 | 0.0193 | 0.2088 |
| Delivery | [MF]6 phospho beta glucosidase activity                               | PTB | -0.8775 | 0.3626 | 0.0198 | 0.2113 |
| Delivery | [MF]organic phosphonate transmembrane transporter<br>activity         | PTB | -0.8699 | 0.3594 | 0.0198 | 0.2113 |
| Delivery | [MF]2 C methyl D erythritol 2 4 cyclodiphosphate<br>synthase activity | PTB | 0.6645  | 0.2765 | 0.0207 | 0.2137 |
| Delivery | [MF]DNA 3 methyladenine glycosylase activity                          | PTB | -1.3957 | 0.5862 | 0.0218 | 0.2198 |
| Delivery | [MF]phosphatidate cytidyltransferase activity                         | PTB | 1.1491  | 0.4825 | 0.0217 | 0.2198 |
| Delivery | [MF]5 nucleotidase activity                                           | PTB | 0.5104  | 0.2157 | 0.0226 | 0.2230 |
| Delivery | [MF]biotin synthase activity                                          | PTB | 0.5042  | 0.2131 | 0.0225 | 0.2230 |
| Delivery | [MF]phosphoribosylglycinamide formyltransferase 2<br>activity         | PTB | 0.7532  | 0.3199 | 0.0232 | 0.2263 |
| Delivery | [MF]protein disulfide oxidoreductase activity                         | PTB | 0.2590  | 0.1101 | 0.0232 | 0.2265 |
| Delivery | [MF]phosphoglycerate dehydrogenase activity                           | PTB | 0.7599  | 0.3238 | 0.0236 | 0.2291 |
| Delivery | [MF]starch binding                                                    | PTB | 0.7298  | 0.3140 | 0.0249 | 0.2324 |
| Delivery | [MF]metallocarboxypeptidase activity                                  | PTB | 0.5769  | 0.2490 | 0.0253 | 0.2345 |
| Delivery | [MF]3 dehydroquinate dehydratase activity                             | PTB | 1.3900  | 0.6009 | 0.0256 | 0.2352 |
| Delivery | [MF]phospho N acetylmuramoyl pentapeptide<br>transferase activity     | PTB | 0.0989  | 0.0428 | 0.0256 | 0.2352 |
| Delivery | [MF]succinate CoA ligase ADP forming activity                         | PTB | 0.4075  | 0.1788 | 0.0277 | 0.2414 |
| Delivery | [MF]cardiolipin synthase activity                                     | PTB | -1.0802 | 0.4750 | 0.0280 | 0.2429 |
| Delivery | [MF]serine type endopeptidase activity                                | PTB | 0.1314  | 0.0578 | 0.0282 | 0.2431 |
| Delivery | [MF]oxygen dependent protoporphyrinogen oxidase<br>activity           | PTB | 0.4856  | 0.2148 | 0.0289 | 0.2468 |

|          |                                                                                                                                     |     |         |        |        |        |
|----------|-------------------------------------------------------------------------------------------------------------------------------------|-----|---------|--------|--------|--------|
| Delivery | [MF]undecaprenyl diphosphatase activity                                                                                             | PTB | 1.2131  | 0.5380 | 0.0293 | 0.2480 |
| Delivery | [MF]2 C methyl D erythritol 4 phosphate cytidyltransferase activity                                                                 | PTB | 0.6563  | 0.2913 | 0.0294 | 0.2481 |
| LLETZ    | [MF]UDP N acetylmuramoyl L alanyl D glutamyl meso 2 6 diaminopimelyl D alanyl D alanine undecaprenyl phosphate transferase activity | Yes | -0.3495 | 0.0738 | 0.0000 | 0.0991 |
| LLETZ    | [MF]pantetheine phosphate adenylyltransferase activity                                                                              | Yes | -0.8030 | 0.1969 | 0.0002 | 0.1123 |
| LLETZ    | [MF]guanylate kinase activity                                                                                                       | Yes | -0.4110 | 0.1138 | 0.0008 | 0.1332 |
| LLETZ    | [MF]adenine phosphoribosyltransferase activity                                                                                      | Yes | 0.5745  | 0.1674 | 0.0013 | 0.1635 |
| LLETZ    | [MF]cobalamin binding                                                                                                               | Yes | 0.8708  | 0.2917 | 0.0047 | 0.1652 |
| LLETZ    | [MF]ferric iron binding                                                                                                             | Yes | -0.3635 | 0.1196 | 0.0040 | 0.1652 |
| LLETZ    | [MF]hydrolase activity hydrolyzing N glycosyl compounds                                                                             | Yes | -0.8851 | 0.2904 | 0.0039 | 0.1652 |
| LLETZ    | [MF]NAD synthase activity                                                                                                           | Yes | 0.3680  | 0.1180 | 0.0032 | 0.1652 |
| LLETZ    | [MF]oxidoreductase activity oxidizing metal ions                                                                                    | Yes | -0.3644 | 0.1195 | 0.0039 | 0.1652 |
| LLETZ    | [MF]ribonuclease III activity                                                                                                       | Yes | 0.4410  | 0.1472 | 0.0045 | 0.1652 |
| LLETZ    | [MF]ribosomal large subunit binding                                                                                                 | Yes | 0.3288  | 0.1080 | 0.0040 | 0.1652 |
| LLETZ    | [MF]nicotinate nucleotide adenylyltransferase activity                                                                              | Yes | -0.2956 | 0.1031 | 0.0064 | 0.1671 |
| LLETZ    | [MF]pyridoxal phosphate binding                                                                                                     | Yes | -0.2681 | 0.0936 | 0.0064 | 0.1671 |
| LLETZ    | [MF]oxidoreductase activity acting on the aldehyde or oxo group of donors NAD or NADP as acceptor                                   | Yes | 0.2045  | 0.0726 | 0.0073 | 0.1673 |
| LLETZ    | [MF]6 phosphofructokinase activity                                                                                                  | Yes | 0.6856  | 0.2486 | 0.0085 | 0.1727 |
| LLETZ    | [MF]C4 dicarboxylate transmembrane transporter activity                                                                             | Yes | -0.9360 | 0.3382 | 0.0083 | 0.1727 |
| LLETZ    | [MF]glucosamine 6 phosphate deaminase activity                                                                                      | Yes | 0.4877  | 0.1789 | 0.0092 | 0.1745 |
| LLETZ    | [MF]protein serine threonine tyrosine kinase activity                                                                               | Yes | 1.0974  | 0.4029 | 0.0093 | 0.1745 |
| LLETZ    | [MF]mismatched DNA binding                                                                                                          | Yes | 0.7083  | 0.2628 | 0.0100 | 0.1752 |
| LLETZ    | [MF]pseudouridine synthase activity                                                                                                 | Yes | 0.1789  | 0.0668 | 0.0104 | 0.1784 |
| LLETZ    | [MF]5 10 methylenetetrahydrofolate dependent tRNA m5U54 methyltransferase activity                                                  | Yes | 0.5630  | 0.2135 | 0.0116 | 0.1809 |

|       |                                                                                          |     |         |        |        |        |
|-------|------------------------------------------------------------------------------------------|-----|---------|--------|--------|--------|
| LLETZ | [MF]methylenetetrahydrofolate tRNA uracil 5 methyltransferase FADH2 oxidizing activity   | Yes | 0.5630  | 0.2135 | 0.0116 | 0.1809 |
| LLETZ | [MF]tRNA adenylyltransferase activity                                                    | Yes | 0.6771  | 0.2559 | 0.0113 | 0.1809 |
| LLETZ | [MF]putrescine importing ATPase activity                                                 | Yes | 1.2014  | 0.4621 | 0.0127 | 0.1836 |
| LLETZ | [MF]spermidine importing ATPase activity                                                 | Yes | 1.2015  | 0.4621 | 0.0127 | 0.1836 |
| LLETZ | [MF]protein methyltransferase activity                                                   | Yes | 0.4189  | 0.1631 | 0.0138 | 0.1837 |
| LLETZ | [MF]tripeptide aminopeptidase activity                                                   | Yes | 0.7819  | 0.3051 | 0.0140 | 0.1837 |
| LLETZ | [MF]ADP binding                                                                          | Yes | 0.6052  | 0.2384 | 0.0148 | 0.1885 |
| LLETZ | [MF]methionyl tRNA formyltransferase activity                                            | Yes | 0.2857  | 0.1125 | 0.0148 | 0.1885 |
| LLETZ | [MF]phosphoribosyl AMP cyclohydrolase activity                                           | Yes | -0.2837 | 0.1115 | 0.0146 | 0.1885 |
| LLETZ | [MF]thymidine kinase activity                                                            | Yes | 0.3975  | 0.1563 | 0.0147 | 0.1885 |
| LLETZ | [MF]phosphotransferase activity phosphate group as acceptor                              | Yes | 0.6031  | 0.2386 | 0.0152 | 0.1903 |
| LLETZ | [MF]acyl phosphate glycerol 3 phosphate acyltransferase activity                         | Yes | 0.5787  | 0.2327 | 0.0169 | 0.1997 |
| LLETZ | [MF]tagatose 6 phosphate kinase activity                                                 | Yes | 1.2006  | 0.4850 | 0.0173 | 0.2028 |
| LLETZ | [MF]aminopeptidase activity                                                              | Yes | 0.7422  | 0.3022 | 0.0182 | 0.2068 |
| LLETZ | [MF]D alanine poly phosphoribitol ligase activity                                        | Yes | 1.2139  | 0.4967 | 0.0187 | 0.2081 |
| LLETZ | [MF]asparagine tRNA ligase activity                                                      | Yes | 0.6171  | 0.2541 | 0.0194 | 0.2088 |
| LLETZ | [MF]metallopeptidase activity                                                            | Yes | 0.6630  | 0.2728 | 0.0193 | 0.2088 |
| LLETZ | [MF]sulfurtransferase activity                                                           | Yes | 0.2492  | 0.1026 | 0.0194 | 0.2088 |
| LLETZ | [MF]2 succinyl 5 enolpyruvyl 6 hydroxy 3 cyclohexene 1 carboxylic acid synthase activity | Yes | -0.9746 | 0.4040 | 0.0202 | 0.2119 |
| LLETZ | [MF]glutamate tRNA ligase activity                                                       | Yes | -0.2188 | 0.0907 | 0.0202 | 0.2119 |
| LLETZ | [MF]glycerol 3 phosphate cytidylyltransferase activity                                   | Yes | 0.8265  | 0.3426 | 0.0202 | 0.2119 |
| LLETZ | [MF]1 phosphofructokinase activity                                                       | Yes | 0.4732  | 0.2050 | 0.0258 | 0.2352 |
| LLETZ | [MF]carbon nitrogen ligase activity with glutamine as amido N donor                      | Yes | 0.7002  | 0.3033 | 0.0258 | 0.2352 |
| LLETZ | [MF]D alanyl carrier activity                                                            | Yes | 1.0650  | 0.4609 | 0.0257 | 0.2352 |
| LLETZ | [MF]thymidylate synthase activity                                                        | Yes | 0.2401  | 0.1039 | 0.0257 | 0.2352 |
| LLETZ | [MF]dCMP deaminase activity                                                              | Yes | 0.5722  | 0.2486 | 0.0263 | 0.2368 |

|                 |                                                              |             |         |        |        |        |
|-----------------|--------------------------------------------------------------|-------------|---------|--------|--------|--------|
| LLETZ           | [MF]Type II site specific deoxyribonuclease activity         | Yes         | -1.2244 | 0.5329 | 0.0265 | 0.2373 |
| LLETZ           | [MF]alpha 1 4 glucosidase activity                           | Yes         | -0.2498 | 0.1092 | 0.0271 | 0.2403 |
| LLETZ           | [MF]maltose alpha glucosidase activity                       | Yes         | -0.2498 | 0.1092 | 0.0271 | 0.2403 |
| LLETZ           | [MF]3 tRNA processing endoribonuclease activity              | Yes         | 1.0406  | 0.4577 | 0.0280 | 0.2429 |
| LLETZ           | [MF]ribonuclease P activity                                  | Yes         | 0.5615  | 0.2482 | 0.0288 | 0.2468 |
| LLETZ           | [MF]serine tRNA ligase activity                              | Yes         | 0.3032  | 0.1348 | 0.0296 | 0.2487 |
| Outcome_group p | [MF]pyruvate dehydrogenase acetyl transferring activity      | no-risk_PTB | 1.3623  | 0.3551 | 0.0004 | 0.1331 |
| Outcome_group p | [MF]acetylglucosaminyltransferase activity                   | no-risk_PTB | 1.2557  | 0.3423 | 0.0007 | 0.1332 |
| Outcome_group p | [MF]voltage gated potassium channel activity                 | no-risk_PTB | 1.9382  | 0.5387 | 0.0008 | 0.1332 |
| Outcome_group p | [MF] S 3 amino 2 methylpropionate transaminase activity      | no-risk_PTB | 2.5220  | 0.7191 | 0.0011 | 0.1499 |
| Outcome_group p | [MF]cystathionine gamma synthase activity                    | no-risk_PTB | 2.2987  | 0.6529 | 0.0010 | 0.1499 |
| Outcome_group p | [MF]sulfate transmembrane transporting ATPase activity       | no-risk_PTB | 1.6792  | 0.4805 | 0.0011 | 0.1499 |
| Outcome_group p | [MF]6 aminohexanoate cyclic dimer hydrolase activity         | no-risk_PTB | 1.9404  | 0.6273 | 0.0035 | 0.1652 |
| Outcome_group p | [MF]acetoin dehydrogenase activity                           | no-risk_PTB | 1.6547  | 0.5492 | 0.0043 | 0.1652 |
| Outcome_group p | [MF]acetyl CoA C acetyltransferase activity                  | no-risk_PTB | 1.2783  | 0.3963 | 0.0024 | 0.1652 |
| Outcome_group p | [MF]androstan 3 alpha 17 beta diol dehydrogenase activity    | no-risk_PTB | 1.5625  | 0.4887 | 0.0026 | 0.1652 |
| Outcome_group p | [MF]dihydrolipoyllysine residue succinyltransferase activity | no-risk_PTB | 1.9677  | 0.5922 | 0.0018 | 0.1652 |
| Outcome_group p | [MF]histidine ammonia lyase activity                         | no-risk_PTB | 1.0607  | 0.3419 | 0.0034 | 0.1652 |
| Outcome_group p | [MF]hydro lyase activity                                     | no-risk_PTB | 1.5968  | 0.4980 | 0.0025 | 0.1652 |

|                    |                                                                 |             |        |        |        |        |
|--------------------|-----------------------------------------------------------------|-------------|--------|--------|--------|--------|
| Outcome_group<br>p | [MF]morphine 6 dehydrogenase activity                           | no-risk_PTB | 1.4763 | 0.4747 | 0.0033 | 0.1652 |
| Outcome_group<br>p | [MF]nitric oxide synthase activity                              | no-risk_PTB | 1.5153 | 0.5057 | 0.0045 | 0.1652 |
| Outcome_group<br>p | [MF]oxidoreductase activity acting on the CH CH group of donors | no-risk_PTB | 1.8028 | 0.6002 | 0.0044 | 0.1652 |
| Outcome_group<br>p | [MF]ADP ribose diphosphatase activity                           | no-risk_PTB | 1.3049 | 0.4594 | 0.0069 | 0.1671 |
| Outcome_group<br>p | [MF]antioxidant activity                                        | no-risk_PTB | 1.7251 | 0.5962 | 0.0060 | 0.1671 |
| Outcome_group<br>p | [MF]gamma glutamyl gamma aminobutyrate hydrolase activity       | no-risk_PTB | 1.5828 | 0.5542 | 0.0066 | 0.1671 |
| Outcome_group<br>p | [MF]histone acetyltransferase activity                          | no-risk_PTB | 0.8404 | 0.2981 | 0.0072 | 0.1671 |
| Outcome_group<br>p | [MF]hydrolase activity acting on acid anhydrides                | no-risk_PTB | 4.3338 | 1.5355 | 0.0072 | 0.1671 |
| Outcome_group<br>p | [MF]L threonine 3 dehydrogenase activity                        | no-risk_PTB | 1.9384 | 0.6663 | 0.0057 | 0.1671 |
| Outcome_group<br>p | [MF]metallocarboxypeptidase activity                            | no-risk_PTB | 1.7823 | 0.6459 | 0.0085 | 0.1727 |
| Outcome_group<br>p | [MF]maltose epimerase activity                                  | no-risk_PTB | 1.8019 | 0.6557 | 0.0087 | 0.1728 |
| Outcome_group<br>p | [MF]inositol monophosphate 1 phosphatase activity               | no-risk_PTB | 1.3585 | 0.5040 | 0.0100 | 0.1752 |
| Outcome_group<br>p | [MF]inositol monophosphate 3 phosphatase activity               | no-risk_PTB | 1.3585 | 0.5040 | 0.0100 | 0.1752 |
| Outcome_group<br>p | [MF]inositol monophosphate 4 phosphatase activity               | no-risk_PTB | 1.3585 | 0.5040 | 0.0100 | 0.1752 |
| Outcome_group<br>p | [MF]aldose 1 epimerase activity                                 | no-risk_PTB | 1.4808 | 0.5524 | 0.0104 | 0.1780 |
| Outcome_group<br>p | [MF]protein transmembrane transporter activity                  | no-risk_PTB | 1.0737 | 0.4093 | 0.0120 | 0.1816 |

|               |                                                                                                                                     |             |         |        |        |        |
|---------------|-------------------------------------------------------------------------------------------------------------------------------------|-------------|---------|--------|--------|--------|
| Outcome_group | [MF]galactonate dehydratase activity                                                                                                | no-risk_PTB | 1.2551  | 0.4790 | 0.0121 | 0.1821 |
| p             |                                                                                                                                     |             |         |        |        |        |
| Outcome_group | [MF]mannosyl glycoprotein endo beta N acetylglucosaminidase activity                                                                | no-risk_PTB | 1.5242  | 0.5841 | 0.0124 | 0.1823 |
| p             |                                                                                                                                     |             |         |        |        |        |
| Outcome_group | [MF]phosphoglycerate mutase activity                                                                                                | no-risk_PTB | 1.8270  | 0.7108 | 0.0137 | 0.1837 |
| p             |                                                                                                                                     |             |         |        |        |        |
| Outcome_group | [MF]gluconokinase activity                                                                                                          | no-risk_PTB | 2.0793  | 0.8267 | 0.0157 | 0.1929 |
| p             |                                                                                                                                     |             |         |        |        |        |
| Outcome_group | [MF]oxo acid lyase activity                                                                                                         | no-risk_PTB | 1.5824  | 0.6467 | 0.0186 | 0.2081 |
| p             |                                                                                                                                     |             |         |        |        |        |
| Outcome_group | [MF]pantoate beta alanine ligase activity                                                                                           | no-risk_PTB | 1.3003  | 0.5403 | 0.0205 | 0.2128 |
| p             |                                                                                                                                     |             |         |        |        |        |
| Outcome_group | [MF]glutamate synthase NADPH activity                                                                                               | no-risk_PTB | 1.4494  | 0.6104 | 0.0221 | 0.2217 |
| p             |                                                                                                                                     |             |         |        |        |        |
| Outcome_group | [MF]intramolecular lyase activity                                                                                                   | no-risk_PTB | 2.8218  | 1.1907 | 0.0223 | 0.2230 |
| p             |                                                                                                                                     |             |         |        |        |        |
| Outcome_group | [MF]carboxylic ester hydrolase activity                                                                                             | no-risk_PTB | 1.1397  | 0.4904 | 0.0249 | 0.2324 |
| p             |                                                                                                                                     |             |         |        |        |        |
| Outcome_group | [MF]metalloexopeptidase activity                                                                                                    | no-risk_PTB | 1.3373  | 0.5894 | 0.0284 | 0.2444 |
| p             |                                                                                                                                     |             |         |        |        |        |
| Outcome_group | [MF]2 C methyl D erythritol 4 phosphate cytidyltransferase activity                                                                 | no-risk_PTB | 1.7074  | 0.7555 | 0.0289 | 0.2468 |
| p             |                                                                                                                                     |             |         |        |        |        |
| Outcome_group | [MF]4 hydroxy 3 methylbut 2 en 1 yl diphosphate synthase activity                                                                   | no-risk_PTB | 1.6747  | 0.7453 | 0.0298 | 0.2492 |
| p             |                                                                                                                                     |             |         |        |        |        |
| Previous_PTB  | [MF]UDP N acetylmuramoyl L alanyl D glutamyl meso 2 6 diaminopimelyl D alanyl D alanine undecaprenyl phosphate transferase activity | Yes         | -0.3368 | 0.0767 | 0.0001 | 0.1006 |
| Previous_PTB  | [MF]ferric iron binding                                                                                                             | Yes         | -0.5020 | 0.1244 | 0.0002 | 0.1123 |
| Previous_PTB  | [MF]hydrolase activity hydrolyzing N glycosyl compounds                                                                             | Yes         | -1.2145 | 0.3021 | 0.0002 | 0.1123 |
| Previous_PTB  | [MF]pantetheine phosphate adenylyltransferase activity                                                                              | Yes         | -0.8603 | 0.2048 | 0.0001 | 0.1123 |

|              |                                                                                                   |     |         |        |        |        |
|--------------|---------------------------------------------------------------------------------------------------|-----|---------|--------|--------|--------|
| Previous_PTB | [MF]ribonuclease III activity                                                                     | Yes | 0.6112  | 0.1531 | 0.0003 | 0.1123 |
| Previous_PTB | [MF]oxidoreductase activity oxidizing metal ions                                                  | Yes | -0.4888 | 0.1243 | 0.0003 | 0.1144 |
| Previous_PTB | [MF]adenine phosphoribosyltransferase activity                                                    | Yes | 0.6610  | 0.1741 | 0.0005 | 0.1331 |
| Previous_PTB | [MF]2 succinyl 5 enolpyruvyl 6 hydroxy 3 cyclohexene 1 carboxylic acid synthase activity          | Yes | -1.5244 | 0.4203 | 0.0008 | 0.1332 |
| Previous_PTB | [MF]guanylate kinase activity                                                                     | Yes | -0.4395 | 0.1184 | 0.0006 | 0.1332 |
| Previous_PTB | [MF]NAD synthase activity                                                                         | Yes | 0.4412  | 0.1227 | 0.0008 | 0.1332 |
| Previous_PTB | [MF]ribosomal large subunit binding                                                               | Yes | 0.4128  | 0.1124 | 0.0007 | 0.1332 |
| Previous_PTB | [MF]C4 dicarboxylate transmembrane transporter activity                                           | Yes | -1.2475 | 0.3518 | 0.0010 | 0.1482 |
| Previous_PTB | [MF]phosphoribosyl AMP cyclohydrolase activity                                                    | Yes | -0.3987 | 0.1160 | 0.0013 | 0.1635 |
| Previous_PTB | [MF]Type II site specific deoxyribonuclease activity                                              | Yes | -1.9134 | 0.5543 | 0.0013 | 0.1635 |
| Previous_PTB | [MF]1 4 dihydroxy 2 naphthoate octaprenyltransferase activity                                     | Yes | -1.6545 | 0.5493 | 0.0043 | 0.1652 |
| Previous_PTB | [MF]1 deoxy D xylulose 5 phosphate reductoisomerase activity                                      | Yes | -1.7175 | 0.5728 | 0.0045 | 0.1652 |
| Previous_PTB | [MF]3 isopropylmalate dehydratase activity                                                        | Yes | -1.6919 | 0.5634 | 0.0044 | 0.1652 |
| Previous_PTB | [MF]alpha 1 4 glucosidase activity                                                                | Yes | -0.3522 | 0.1136 | 0.0034 | 0.1652 |
| Previous_PTB | [MF]D alanine poly phosphoribitol ligase activity                                                 | Yes | 1.5417  | 0.5167 | 0.0047 | 0.1652 |
| Previous_PTB | [MF]fatty acid synthase activity                                                                  | Yes | -0.5006 | 0.1551 | 0.0024 | 0.1652 |
| Previous_PTB | [MF]maltose alpha glucosidase activity                                                            | Yes | -0.3522 | 0.1136 | 0.0034 | 0.1652 |
| Previous_PTB | [MF]nicotinate nucleotide adenylyltransferase activity                                            | Yes | -0.3403 | 0.1072 | 0.0028 | 0.1652 |
| Previous_PTB | [MF]oxidoreductase activity acting on the aldehyde or oxo group of donors NAD or NADP as acceptor | Yes | 0.2267  | 0.0755 | 0.0045 | 0.1652 |
| Previous_PTB | [MF]protein methyltransferase activity                                                            | Yes | 0.5621  | 0.1696 | 0.0019 | 0.1652 |
| Previous_PTB | [MF]protein serine threonine tyrosine kinase activity                                             | Yes | 1.2845  | 0.4191 | 0.0038 | 0.1652 |
| Previous_PTB | [MF]pyridoxal phosphate binding                                                                   | Yes | -0.3268 | 0.0973 | 0.0017 | 0.1652 |
| Previous_PTB | [MF]rRNA adenine C2 methyltransferase activity                                                    | Yes | -1.8586 | 0.5710 | 0.0022 | 0.1652 |
| Previous_PTB | [MF]tRNA adenine C2 methyltransferase activity                                                    | Yes | -1.8586 | 0.5710 | 0.0022 | 0.1652 |
| Previous_PTB | [MF]3 isopropylmalate dehydrogenase activity                                                      | Yes | -1.4875 | 0.5041 | 0.0051 | 0.1665 |
| Previous_PTB | [MF]cobalamin binding                                                                             | Yes | 0.8894  | 0.3035 | 0.0054 | 0.1665 |

|              |                                                                                          |     |         |        |        |        |
|--------------|------------------------------------------------------------------------------------------|-----|---------|--------|--------|--------|
| Previous_PTB | [MF]D alanyl carrier activity                                                            | Yes | 1.4089  | 0.4795 | 0.0053 | 0.1665 |
| Previous_PTB | [MF]dihydroxy acid dehydratase activity                                                  | Yes | -1.6306 | 0.5534 | 0.0052 | 0.1665 |
| Previous_PTB | [MF]leucine tRNA ligase activity                                                         | Yes | -1.9199 | 0.6548 | 0.0054 | 0.1665 |
| Previous_PTB | [MF]oxidoreductase activity acting on the CH NH2 group of donors NAD or NADP as acceptor | Yes | -1.9426 | 0.6602 | 0.0052 | 0.1665 |
| Previous_PTB | [MF]putrescine importing ATPase activity                                                 | Yes | 1.4107  | 0.4807 | 0.0053 | 0.1665 |
| Previous_PTB | [MF]pyridoxal kinase activity                                                            | Yes | -1.8902 | 0.6382 | 0.0050 | 0.1665 |
| Previous_PTB | [MF]spermidine importing ATPase activity                                                 | Yes | 1.4105  | 0.4807 | 0.0053 | 0.1665 |
| Previous_PTB | [MF]sulfurtransferase activity                                                           | Yes | 0.3158  | 0.1067 | 0.0050 | 0.1665 |
| Previous_PTB | [MF]3 iron 4 sulfur cluster binding                                                      | Yes | -1.3532 | 0.4735 | 0.0066 | 0.1671 |
| Previous_PTB | [MF]4 hydroxy 3 methylbut 2 en 1 yl diphosphate reductase activity                       | Yes | -1.3532 | 0.4735 | 0.0066 | 0.1671 |
| Previous_PTB | [MF]aminoacylase activity                                                                | Yes | -0.2673 | 0.0934 | 0.0065 | 0.1671 |
| Previous_PTB | [MF]anthranilate phosphoribosyltransferase activity                                      | Yes | -1.3808 | 0.4796 | 0.0062 | 0.1671 |
| Previous_PTB | [MF]carbon nitrogen ligase activity with glutamine as amido N donor                      | Yes | 0.9186  | 0.3155 | 0.0057 | 0.1671 |
| Previous_PTB | [MF]carbonate dehydratase activity                                                       | Yes | -1.4249 | 0.5033 | 0.0070 | 0.1671 |
| Previous_PTB | [MF]deoxyribonuclease IV phage T4 induced activity                                       | Yes | -1.7218 | 0.6092 | 0.0071 | 0.1671 |
| Previous_PTB | [MF]DNA directed DNA polymerase activity                                                 | Yes | 0.2879  | 0.1004 | 0.0064 | 0.1671 |
| Previous_PTB | [MF]endoribonuclease activity                                                            | Yes | 0.2135  | 0.0743 | 0.0063 | 0.1671 |
| Previous_PTB | [MF]formate C acetyltransferase activity                                                 | Yes | -1.5634 | 0.5439 | 0.0063 | 0.1671 |
| Previous_PTB | [MF]glucosamine 6 phosphate deaminase activity                                           | Yes | 0.5287  | 0.1861 | 0.0068 | 0.1671 |
| Previous_PTB | [MF]isocitrate dehydrogenase NADP activity                                               | Yes | -0.9969 | 0.3430 | 0.0058 | 0.1671 |
| Previous_PTB | [MF]ketol acid reductoisomerase activity                                                 | Yes | -1.7283 | 0.6091 | 0.0069 | 0.1671 |
| Previous_PTB | [MF]L threonine ammonia lyase activity                                                   | Yes | -1.8400 | 0.6477 | 0.0069 | 0.1671 |
| Previous_PTB | [MF]methionyl tRNA formyltransferase activity                                            | Yes | 0.3310  | 0.1171 | 0.0071 | 0.1671 |
| Previous_PTB | [MF]N methyltransferase activity                                                         | Yes | 0.6370  | 0.2246 | 0.0069 | 0.1671 |
| Previous_PTB | [MF]NAD binding                                                                          | Yes | -0.2429 | 0.0862 | 0.0073 | 0.1671 |
| Previous_PTB | [MF]shikimate kinase activity                                                            | Yes | -2.0763 | 0.7132 | 0.0057 | 0.1671 |
| Previous_PTB | [MF]thymidylate synthase activity                                                        | Yes | 0.3135  | 0.1081 | 0.0059 | 0.1671 |



|              |                                                                                                            |     |         |        |        |        |
|--------------|------------------------------------------------------------------------------------------------------------|-----|---------|--------|--------|--------|
| Previous_PTB | [MF]tRNA guanine 37 N 1 methyltransferase activity                                                         | Yes | 0.3449  | 0.1211 | 0.0067 | 0.1671 |
| Previous_PTB | [MF]serine tRNA ligase activity                                                                            | Yes | 0.3928  | 0.1402 | 0.0076 | 0.1719 |
| Previous_PTB | [MF]1 5 phosphoribosyl 5 5 phosphoribosylamino methylideneamino imidazole 4 carboxamide isomerase activity | Yes | -0.7796 | 0.2787 | 0.0077 | 0.1726 |
| Previous_PTB | [MF]dinitrosyl iron complex binding                                                                        | Yes | -2.2160 | 0.7955 | 0.0079 | 0.1726 |
| Previous_PTB | [MF]protein dimerization activity                                                                          | Yes | -1.8085 | 0.6481 | 0.0078 | 0.1726 |
| Previous_PTB | [MF]calcium transporting ATPase activity                                                                   | Yes | -0.3599 | 0.1296 | 0.0081 | 0.1727 |
| Previous_PTB | [MF]imidazoleglycerol phosphate synthase activity                                                          | Yes | -1.0720 | 0.3874 | 0.0083 | 0.1727 |
| Previous_PTB | [MF]phosphoribosylanthranilate isomerase activity                                                          | Yes | -1.6286 | 0.5854 | 0.0080 | 0.1727 |
| Previous_PTB | [MF]tagatose 6 phosphate kinase activity                                                                   | Yes | 1.3939  | 0.5045 | 0.0084 | 0.1727 |
| Previous_PTB | [MF]5 10 methylenetetrahydrofolate dependent tRNA m5U54 methyltransferase activity                         | Yes | 0.6092  | 0.2221 | 0.0089 | 0.1728 |
| Previous_PTB | [MF]ligase activity forming carbon nitrogen bonds                                                          | Yes | 0.2566  | 0.0935 | 0.0088 | 0.1728 |
| Previous_PTB | [MF]methylenetetrahydrofolate tRNA uracil 5 methyltransferase FADH2 oxidizing activity                     | Yes | 0.6092  | 0.2221 | 0.0089 | 0.1728 |
| Previous_PTB | [MF]N2 acetyl L ornithine 2 oxoglutarate 5 aminotransferase activity                                       | Yes | -1.6402 | 0.5986 | 0.0089 | 0.1728 |
| Previous_PTB | [MF]thiaminase activity                                                                                    | Yes | -1.3926 | 0.5063 | 0.0087 | 0.1728 |
| Previous_PTB | [MF]tRNA adenylyltransferase activity                                                                      | Yes | 0.7315  | 0.2662 | 0.0087 | 0.1728 |
| Previous_PTB | [MF]glucose 1 phosphate thymidyltransferase activity                                                       | Yes | -1.0741 | 0.3930 | 0.0091 | 0.1738 |
| Previous_PTB | [MF]acetylglutamate kinase activity                                                                        | Yes | -1.2770 | 0.4695 | 0.0094 | 0.1746 |
| Previous_PTB | [MF]DNA N glycosylase activity                                                                             | Yes | 0.6836  | 0.2518 | 0.0095 | 0.1746 |
| Previous_PTB | [MF]ATP phosphoribosyltransferase activity                                                                 | Yes | -1.6337 | 0.6043 | 0.0098 | 0.1752 |
| Previous_PTB | [MF]phosphotransferase activity phosphate group as acceptor                                                | Yes | 0.6698  | 0.2482 | 0.0099 | 0.1752 |
| Previous_PTB | [MF]argininosuccinate synthase activity                                                                    | Yes | -1.7961 | 0.6673 | 0.0101 | 0.1760 |
| Previous_PTB | [MF]ADP binding                                                                                            | Yes | 0.6667  | 0.2480 | 0.0102 | 0.1765 |
| Previous_PTB | [MF]aminopeptidase activity                                                                                | Yes | 0.8447  | 0.3143 | 0.0102 | 0.1765 |

|              |                                                                                  |     |         |        |        |        |
|--------------|----------------------------------------------------------------------------------|-----|---------|--------|--------|--------|
| Previous_PTB | [MF]acetyl CoA L glutamate N acetyltransferase activity                          | Yes | -1.6297 | 0.6144 | 0.0111 | 0.1801 |
| Previous_PTB | [MF]glutamate N acetyltransferase activity                                       | Yes | -1.6297 | 0.6144 | 0.0111 | 0.1801 |
| Previous_PTB | [MF]N acetylglucosamine transmembrane transporter activity                       | Yes | -1.6703 | 0.6275 | 0.0109 | 0.1801 |
| Previous_PTB | [MF]tripeptide aminopeptidase activity                                           | Yes | 0.8458  | 0.3174 | 0.0108 | 0.1801 |
| Previous_PTB | [MF]metallopeptidase activity                                                    | Yes | 0.7521  | 0.2838 | 0.0112 | 0.1805 |
| Previous_PTB | [MF]cystathionine beta lyase activity                                            | Yes | -1.1583 | 0.4402 | 0.0118 | 0.1809 |
| Previous_PTB | [MF]deoxyguanosine kinase activity                                               | Yes | 1.3601  | 0.5177 | 0.0119 | 0.1809 |
| Previous_PTB | [MF]glutamate racemase activity                                                  | Yes | 1.2222  | 0.4648 | 0.0118 | 0.1809 |
| Previous_PTB | [MF]manganese ion transmembrane transporter activity                             | Yes | -1.3799 | 0.5231 | 0.0116 | 0.1809 |
| Previous_PTB | [MF]mismatched DNA binding                                                       | Yes | 0.7208  | 0.2734 | 0.0116 | 0.1809 |
| Previous_PTB | [MF]oxidoreductase activity acting on a sulfur group of donors NAD P as acceptor | Yes | -1.5456 | 0.5883 | 0.0119 | 0.1809 |
| Previous_PTB | [MF]phosphate ion binding                                                        | Yes | -1.2844 | 0.4880 | 0.0117 | 0.1809 |
| Previous_PTB | [MF]pseudouridine synthase activity                                              | Yes | 0.1829  | 0.0695 | 0.0117 | 0.1809 |
| Previous_PTB | [MF]threonine synthase activity                                                  | Yes | -1.9621 | 0.7447 | 0.0117 | 0.1809 |
| Previous_PTB | [MF]coproporphyrinogen oxidase activity                                          | Yes | -2.0443 | 0.7827 | 0.0123 | 0.1823 |
| Previous_PTB | [MF]glucose 1 phosphate adenylyltransferase activity                             | Yes | -2.0299 | 0.7776 | 0.0124 | 0.1823 |
| Previous_PTB | [MF]glycerol 3 phosphate cytidylyltransferase activity                           | Yes | 0.9295  | 0.3564 | 0.0125 | 0.1823 |
| Previous_PTB | [MF]histidinol dehydrogenase activity                                            | Yes | -1.7100 | 0.6533 | 0.0122 | 0.1823 |
| Previous_PTB | [MF]NADPH quinone reductase activity                                             | Yes | 0.8788  | 0.3370 | 0.0125 | 0.1823 |
| Previous_PTB | [MF]3 dehydroquinone synthase activity                                           | Yes | -2.2193 | 0.8567 | 0.0130 | 0.1837 |
| Previous_PTB | [MF]alpha L fucosidase activity                                                  | Yes | -0.8368 | 0.3243 | 0.0134 | 0.1837 |
| Previous_PTB | [MF]aminoacyl tRNA editing activity                                              | Yes | -0.2788 | 0.1086 | 0.0138 | 0.1837 |
| Previous_PTB | [MF]chorismate synthase activity                                                 | Yes | -2.1784 | 0.8498 | 0.0139 | 0.1837 |
| Previous_PTB | [MF]dGTPase activity                                                             | Yes | -1.9902 | 0.7701 | 0.0132 | 0.1837 |
| Previous_PTB | [MF]enzyme regulator activity                                                    | Yes | -1.1474 | 0.4464 | 0.0137 | 0.1837 |
| Previous_PTB | [MF]fructose bisphosphate aldolase activity                                      | Yes | -2.1528 | 0.8328 | 0.0132 | 0.1837 |
| Previous_PTB | [MF]protein glutamine N methyltransferase activity                               | Yes | -1.8627 | 0.7232 | 0.0135 | 0.1837 |

|              |                                                                                                                                                                                      |     |         |        |        |        |
|--------------|--------------------------------------------------------------------------------------------------------------------------------------------------------------------------------------|-----|---------|--------|--------|--------|
| Previous_PTB | [MF]ribonuclease P activity                                                                                                                                                          | Yes | 0.6634  | 0.2582 | 0.0137 | 0.1837 |
| Previous_PTB | [MF]sedoheptulose 7 phosphate D glyceraldehyde 3 phosphate glyceronetransferase activity                                                                                             | Yes | -1.1811 | 0.4581 | 0.0134 | 0.1837 |
| Previous_PTB | [MF]single stranded DNA endodeoxyribonuclease activity                                                                                                                               | Yes | -0.9900 | 0.3815 | 0.0129 | 0.1837 |
| Previous_PTB | [MF]tRNA nucleotidyltransferase activity                                                                                                                                             | Yes | -1.3537 | 0.5254 | 0.0135 | 0.1837 |
| Previous_PTB | [MF]tRNA specific ribonuclease activity                                                                                                                                              | Yes | -1.3537 | 0.5254 | 0.0135 | 0.1837 |
| Previous_PTB | [MF]UDP N acetylmuramate L alanine ligase activity                                                                                                                                   | Yes | 0.3541  | 0.1370 | 0.0132 | 0.1837 |
| Previous_PTB | [MF]thymidine kinase activity                                                                                                                                                        | Yes | 0.4155  | 0.1626 | 0.0142 | 0.1852 |
| Previous_PTB | [MF]exoribonuclease activity producing 5 phosphomonoesters                                                                                                                           | Yes | -1.3823 | 0.5439 | 0.0147 | 0.1885 |
| Previous_PTB | [MF]imidazoleglycerol phosphate dehydratase activity                                                                                                                                 | Yes | -1.4450 | 0.5692 | 0.0148 | 0.1885 |
| Previous_PTB | [MF]UDP N acetyl D glucosamine N acetylmuramoyl L alanyl D glutamyl meso 2 6 diaminopimelyl D alanyl D alanine diphosphoundecaprenol 4 beta N acetylglucosaminyltransferase activity | Yes | 0.2998  | 0.1183 | 0.0150 | 0.1896 |
| Previous_PTB | [MF]undecaprenyldiphospho muramoylpentapeptide beta N acetylglucosaminyltransferase activity                                                                                         | Yes | 0.2998  | 0.1183 | 0.0150 | 0.1896 |
| Previous_PTB | [MF]exodeoxyribonuclease VII activity                                                                                                                                                | Yes | 0.2710  | 0.1071 | 0.0151 | 0.1899 |
| Previous_PTB | [MF]UDP N acetylmuramoylalanyl D glutamyl 2 6 diaminopimelate D alanyl D alanine ligase activity                                                                                     | Yes | 0.2498  | 0.0988 | 0.0152 | 0.1903 |
| Previous_PTB | [MF]6 phosphofructokinase activity                                                                                                                                                   | Yes | 0.6508  | 0.2586 | 0.0157 | 0.1929 |
| Previous_PTB | [MF]penicillin binding                                                                                                                                                               | Yes | 1.1874  | 0.4722 | 0.0157 | 0.1929 |
| Previous_PTB | [MF]phosphoglucomutase activity                                                                                                                                                      | Yes | -2.1446 | 0.8528 | 0.0157 | 0.1929 |
| Previous_PTB | [MF]tryptophan synthase activity                                                                                                                                                     | Yes | -1.6991 | 0.6759 | 0.0158 | 0.1929 |
| Previous_PTB | [MF]hydroxymethylglutaryl CoA synthase activity                                                                                                                                      | Yes | 0.7918  | 0.3156 | 0.0159 | 0.1939 |
| Previous_PTB | [MF]cysteine synthase activity                                                                                                                                                       | Yes | -1.6492 | 0.6590 | 0.0162 | 0.1954 |
| Previous_PTB | [MF]glutamate tRNA ligase activity                                                                                                                                                   | Yes | -0.2363 | 0.0944 | 0.0162 | 0.1954 |
| Previous_PTB | [MF]tyrosine based site specific recombinase activity                                                                                                                                | Yes | 0.4027  | 0.1611 | 0.0164 | 0.1959 |
| Previous_PTB | [MF]pyridoxal 5 phosphate synthase glutamine hydrolysing activity                                                                                                                    | Yes | -1.8618 | 0.7483 | 0.0168 | 0.1996 |

|              |                                                                        |     |         |        |        |        |
|--------------|------------------------------------------------------------------------|-----|---------|--------|--------|--------|
| Previous_PTB | [MF]uracil DNA N glycosylase activity                                  | Yes | 1.2790  | 0.5173 | 0.0174 | 0.2038 |
| Previous_PTB | [MF]L isoleucine transaminase activity                                 | Yes | -1.5534 | 0.6332 | 0.0183 | 0.2068 |
| Previous_PTB | [MF]L leucine transaminase activity                                    | Yes | -1.5534 | 0.6332 | 0.0183 | 0.2068 |
| Previous_PTB | [MF]L valine transaminase activity                                     | Yes | -1.5534 | 0.6332 | 0.0183 | 0.2068 |
| Previous_PTB | [MF]peroxiredoxin activity                                             | Yes | -1.6932 | 0.6898 | 0.0182 | 0.2068 |
| Previous_PTB | [MF]hydroxyethylthiazole kinase activity                               | Yes | -1.8922 | 0.7719 | 0.0184 | 0.2072 |
| Previous_PTB | [MF]serine O acetyltransferase activity                                | Yes | -1.7896 | 0.7332 | 0.0188 | 0.2084 |
| Previous_PTB | [MF]5' 3' exonuclease activity                                         | Yes | 1.6427  | 0.6743 | 0.0191 | 0.2088 |
| Previous_PTB | [MF]5' carboxyamino imidazole ribonucleotide mutase activity           | Yes | -1.7723 | 0.7278 | 0.0191 | 0.2088 |
| Previous_PTB | [MF]5' carboxyamino imidazole ribonucleotide synthase activity         | Yes | -1.6736 | 0.6868 | 0.0190 | 0.2088 |
| Previous_PTB | [MF]aspartate kinase activity                                          | Yes | -2.5118 | 1.0338 | 0.0194 | 0.2088 |
| Previous_PTB | [MF]thymidylate kinase activity                                        | Yes | 1.0134  | 0.4186 | 0.0198 | 0.2113 |
| Previous_PTB | [MF]3 deoxy 7 phosphoheptulonate synthase activity                     | Yes | -2.2299 | 0.9248 | 0.0202 | 0.2119 |
| Previous_PTB | [MF]histidinol phosphate transaminase activity                         | Yes | -2.1192 | 0.8785 | 0.0202 | 0.2119 |
| Previous_PTB | [MF]transferase activity transferring amino acyl groups                | Yes | -1.4676 | 0.6077 | 0.0201 | 0.2119 |
| Previous_PTB | [MF]acetolactate synthase activity                                     | Yes | -1.8041 | 0.7534 | 0.0211 | 0.2166 |
| Previous_PTB | [MF]amidophosphoribosyltransferase activity                            | Yes | -1.7522 | 0.7329 | 0.0213 | 0.2178 |
| Previous_PTB | [MF]acyl phosphate glycerol 3 phosphate acyltransferase activity       | Yes | 0.5767  | 0.2421 | 0.0217 | 0.2198 |
| Previous_PTB | [MF]coenzyme binding                                                   | Yes | 0.1675  | 0.0703 | 0.0216 | 0.2198 |
| Previous_PTB | [MF]UDP N acetylmuramoyl tripeptide D alanyl D alanine ligase activity | Yes | 0.2361  | 0.0990 | 0.0216 | 0.2198 |
| Previous_PTB | [MF]transferase activity transferring hexosyl groups                   | Yes | -1.8901 | 0.7968 | 0.0222 | 0.2223 |
| Previous_PTB | [MF]3 oxoacyl acyl carrier protein reductase NADPH activity            | Yes | -2.0717 | 0.8752 | 0.0225 | 0.2230 |
| Previous_PTB | [MF]glutamate 5 semialdehyde dehydrogenase activity                    | Yes | -1.7832 | 0.7544 | 0.0227 | 0.2236 |
| Previous_PTB | [MF]peptide transporter activity                                       | Yes | 1.4469  | 0.6140 | 0.0231 | 0.2263 |
| Previous_PTB | [MF]deoxyadenosine kinase activity                                     | Yes | 1.0516  | 0.4482 | 0.0236 | 0.2291 |

|              |                                                                                 |     |         |        |        |        |
|--------------|---------------------------------------------------------------------------------|-----|---------|--------|--------|--------|
| Previous_PTB | [MF]ribose 5 phosphate isomerase activity                                       | Yes | -0.1593 | 0.0680 | 0.0238 | 0.2293 |
| Previous_PTB | [MF]phosphoribosylaminoimidazolesuccinocarboxamide synthase activity            | Yes | -1.7991 | 0.7678 | 0.0238 | 0.2294 |
| Previous_PTB | [MF]IMP cyclohydrolase activity                                                 | Yes | -1.9794 | 0.8482 | 0.0244 | 0.2318 |
| Previous_PTB | [MF]phosphoribosylaminoimidazolecarboxamide formyltransferase activity          | Yes | -1.9794 | 0.8482 | 0.0244 | 0.2318 |
| Previous_PTB | [MF]sodium ion transmembrane transporter activity                               | Yes | -1.4888 | 0.6373 | 0.0242 | 0.2318 |
| Previous_PTB | [MF]argininosuccinate lyase activity                                            | Yes | -1.9023 | 0.8168 | 0.0246 | 0.2319 |
| Previous_PTB | [MF]dTDP 4 dehydrorhamnose 3 5 epimerase activity                               | Yes | -1.5132 | 0.6495 | 0.0246 | 0.2319 |
| Previous_PTB | [MF]2 3 4 5 tetrahydropyridine 2 6 dicarboxylate N succinyltransferase activity | Yes | -1.4475 | 0.6227 | 0.0249 | 0.2324 |
| Previous_PTB | [MF]rRNA cytosine N4 methyltransferase activity                                 | Yes | -0.1998 | 0.0861 | 0.0251 | 0.2333 |
| Previous_PTB | [MF]L phenylalanine 2 oxoglutarate aminotransferase activity                    | Yes | -2.0886 | 0.9016 | 0.0254 | 0.2345 |
| Previous_PTB | [MF]glucose 6 phosphate dehydrogenase activity                                  | Yes | 0.3382  | 0.1470 | 0.0264 | 0.2368 |
| Previous_PTB | [MF]tetrahydrofolylpolyglutamate synthase activity                              | Yes | 1.0875  | 0.4728 | 0.0263 | 0.2368 |
| Previous_PTB | [MF]N acetyl gamma glutamyl phosphate reductase activity                        | Yes | -2.1352 | 0.9287 | 0.0264 | 0.2370 |
| Previous_PTB | [MF]phosphomevalonate kinase activity                                           | Yes | 1.7425  | 0.7602 | 0.0269 | 0.2398 |
| Previous_PTB | [MF]4 hydroxy tetrahydrodipicolinate synthase                                   | Yes | -2.0091 | 0.8791 | 0.0273 | 0.2403 |
| Previous_PTB | [MF]ferrous iron transmembrane transporter activity                             | Yes | -1.1128 | 0.4870 | 0.0273 | 0.2403 |
| Previous_PTB | [MF]succinyl diaminopimelate desuccinylase activity                             | Yes | -1.4336 | 0.6273 | 0.0273 | 0.2403 |
| Previous_PTB | [MF]phosphorelay sensor kinase activity                                         | Yes | 0.1669  | 0.0732 | 0.0277 | 0.2414 |
| Previous_PTB | [MF]phosphoribosylformylglycinamide cyclo ligase activity                       | Yes | -1.9864 | 0.8713 | 0.0276 | 0.2414 |
| Previous_PTB | [MF]amidase activity                                                            | Yes | 1.4995  | 0.6583 | 0.0278 | 0.2417 |
| Previous_PTB | [MF]dCMP deaminase activity                                                     | Yes | 0.5844  | 0.2586 | 0.0289 | 0.2468 |
| Previous_PTB | [MF]phosphoribosylamine glycine ligase activity                                 | Yes | -2.1732 | 0.9620 | 0.0290 | 0.2469 |
| Previous_PTB | [MF]phosphoribosylaminoimidazole carboxylase activity                           | Yes | -2.0045 | 0.8882 | 0.0292 | 0.2476 |
| Previous_PTB | [MF]S ribosylhomocysteine lyase activity                                        | Yes | -1.6315 | 0.7237 | 0.0293 | 0.2480 |

|              |                                                                                                                                     |      |         |        |        |        |
|--------------|-------------------------------------------------------------------------------------------------------------------------------------|------|---------|--------|--------|--------|
| Previous_PTB | [MF]nicotinate nucleotide diphosphorylase                                                                                           | Yes  | -0.2552 | 0.1134 | 0.0296 | 0.2487 |
| Risk_group   | [MF]carboxylating activity                                                                                                          |      |         |        |        |        |
| Risk_group   | [MF]UDP N acetylmuramoyl L alanyl D glutamyl meso 2 6 diaminopimelyl D alanyl D alanine undecaprenyl phosphate transferase activity | Risk | 0.3651  | 0.0830 | 0.0001 | 0.1006 |
| Risk_group   | [MF]hydrolase activity hydrolyzing N glycosyl compounds                                                                             | Risk | 1.3274  | 0.3269 | 0.0002 | 0.1123 |
| Risk_group   | [MF]pantetheine phosphate adenyltransferase activity                                                                                | Risk | 0.8795  | 0.2216 | 0.0003 | 0.1123 |
| Risk_group   | [MF]C4 dicarboxylate transmembrane transporter activity                                                                             | Risk | 1.4286  | 0.3807 | 0.0005 | 0.1331 |
| Risk_group   | [MF]ferric iron binding                                                                                                             | Risk | 0.5124  | 0.1346 | 0.0004 | 0.1331 |
| Risk_group   | [MF]oxidoreductase activity oxidizing metal ions                                                                                    | Risk | 0.5028  | 0.1345 | 0.0005 | 0.1331 |
| Risk_group   | [MF]2 succinyl 5 enolpyruvyl 6 hydroxy 3 cyclohexene 1 carboxylic acid synthase activity                                            | Risk | 1.6531  | 0.4548 | 0.0007 | 0.1332 |
| Risk_group   | [MF]threonine synthase activity                                                                                                     | Risk | 2.8189  | 0.8058 | 0.0011 | 0.1499 |
| Risk_group   | [MF]3 dehydroquinone synthase activity                                                                                              | Risk | 2.9333  | 0.9270 | 0.0029 | 0.1652 |
| Risk_group   | [MF]3 deoxy 7 phosphoheptulonate synthase activity                                                                                  | Risk | 3.1471  | 1.0007 | 0.0030 | 0.1652 |
| Risk_group   | [MF]5 carboxyamino imidazole ribonucleotide synthase activity                                                                       | Risk | 2.2673  | 0.7432 | 0.0039 | 0.1652 |
| Risk_group   | [MF]amidophosphoribosyltransferase activity                                                                                         | Risk | 2.3673  | 0.7930 | 0.0047 | 0.1652 |
| Risk_group   | [MF]argininosuccinate lyase activity                                                                                                | Risk | 2.7091  | 0.8838 | 0.0038 | 0.1652 |
| Risk_group   | [MF]argininosuccinate synthase activity                                                                                             | Risk | 2.3875  | 0.7221 | 0.0019 | 0.1652 |
| Risk_group   | [MF]carbonate dehydratase activity                                                                                                  | Risk | 1.7574  | 0.5446 | 0.0024 | 0.1652 |
| Risk_group   | [MF]chorismate synthase activity                                                                                                    | Risk | 3.0240  | 0.9195 | 0.0020 | 0.1652 |
| Risk_group   | [MF]coproporphyrinogen oxidase activity                                                                                             | Risk | 2.5362  | 0.8469 | 0.0045 | 0.1652 |
| Risk_group   | [MF]crossover junction endodeoxyribonuclease activity                                                                               | Risk | 2.4662  | 0.7721 | 0.0026 | 0.1652 |
| Risk_group   | [MF]cysteine synthase activity                                                                                                      | Risk | 2.1803  | 0.7131 | 0.0038 | 0.1652 |
| Risk_group   | [MF]dGTPase activity                                                                                                                | Risk | 2.5615  | 0.8333 | 0.0037 | 0.1652 |
| Risk_group   | [MF]dinitrosyl iron complex binding                                                                                                 | Risk | 2.5701  | 0.8608 | 0.0047 | 0.1652 |

|            |                                                                                          |      |         |        |        |        |
|------------|------------------------------------------------------------------------------------------|------|---------|--------|--------|--------|
| Risk_group | [MF]fatty acid synthase activity                                                         | Risk | 0.5065  | 0.1678 | 0.0043 | 0.1652 |
| Risk_group | [MF]formate C acetyltransferase activity                                                 | Risk | 1.7699  | 0.5885 | 0.0044 | 0.1652 |
| Risk_group | [MF]glucose 1 phosphate thymidyltransferase activity                                     | Risk | 1.2684  | 0.4252 | 0.0047 | 0.1652 |
| Risk_group | [MF]glutamate 5 semialdehyde dehydrogenase activity                                      | Risk | 2.5240  | 0.8163 | 0.0035 | 0.1652 |
| Risk_group | [MF]guanylate kinase activity                                                            | Risk | 0.4373  | 0.1281 | 0.0014 | 0.1652 |
| Risk_group | [MF]histidinol phosphate transaminase activity                                           | Risk | 2.9065  | 0.9506 | 0.0038 | 0.1652 |
| Risk_group | [MF]hydroxyethylthiazole kinase activity                                                 | Risk | 2.5949  | 0.8353 | 0.0033 | 0.1652 |
| Risk_group | [MF]L isoleucine transaminase activity                                                   | Risk | 2.1240  | 0.6852 | 0.0034 | 0.1652 |
| Risk_group | [MF]L leucine transaminase activity                                                      | Risk | 2.1240  | 0.6852 | 0.0034 | 0.1652 |
| Risk_group | [MF]L valine transaminase activity                                                       | Risk | 2.1240  | 0.6852 | 0.0034 | 0.1652 |
| Risk_group | [MF]leucine tRNA ligase activity                                                         | Risk | 2.3567  | 0.7085 | 0.0018 | 0.1652 |
| Risk_group | [MF]nicotinate nucleotide adenylyltransferase activity                                   | Risk | 0.3857  | 0.1160 | 0.0018 | 0.1652 |
| Risk_group | [MF]phosphate ion binding                                                                | Risk | 1.6105  | 0.5280 | 0.0039 | 0.1652 |
| Risk_group | [MF]phosphoglucomutase activity                                                          | Risk | 2.8437  | 0.9228 | 0.0036 | 0.1652 |
| Risk_group | [MF]phosphoribosyl AMP cyclohydrolase activity                                           | Risk | 0.3738  | 0.1255 | 0.0048 | 0.1652 |
| Risk_group | [MF]phosphoribosylaminoimidazole carboxylase activity                                    | Risk | 3.0266  | 0.9611 | 0.0030 | 0.1652 |
| Risk_group | [MF]phosphoribosylaminoimidazolesuccinocarboxamide synthase activity                     | Risk | 2.5049  | 0.8308 | 0.0043 | 0.1652 |
| Risk_group | [MF]phosphoribosylformylglycinamide cyclo ligase activity                                | Risk | 2.9415  | 0.9427 | 0.0032 | 0.1652 |
| Risk_group | [MF]protein methyltransferase activity                                                   | Risk | -0.5513 | 0.1835 | 0.0044 | 0.1652 |
| Risk_group | [MF]pyridoxal 5 phosphate synthase glutamine hydrolysing activity                        | Risk | 2.4703  | 0.8097 | 0.0039 | 0.1652 |
| Risk_group | [MF]ribonuclease III activity                                                            | Risk | -0.5631 | 0.1657 | 0.0015 | 0.1652 |
| Risk_group | [MF]rRNA adenine C2 methyltransferase activity                                           | Risk | 1.8450  | 0.6179 | 0.0046 | 0.1652 |
| Risk_group | [MF]sedoheptulose 7 phosphate D glyceraldehyde 3 phosphate glyceronetransferase activity | Risk | 1.5449  | 0.4957 | 0.0033 | 0.1652 |
| Risk_group | [MF]serine O acetyltransferase activity                                                  | Risk | 2.3646  | 0.7933 | 0.0047 | 0.1652 |
| Risk_group | [MF]shikimate kinase activity                                                            | Risk | 2.4807  | 0.7717 | 0.0025 | 0.1652 |

|            |                                                                                                   |      |         |        |        |        |
|------------|---------------------------------------------------------------------------------------------------|------|---------|--------|--------|--------|
| Risk_group | [MF]sodium ion transmembrane transporter activity                                                 | Risk | 2.0641  | 0.6896 | 0.0046 | 0.1652 |
| Risk_group | [MF]tRNA adenine C2 methyltransferase activity                                                    | Risk | 1.8450  | 0.6179 | 0.0046 | 0.1652 |
| Risk_group | [MF]tRNA nucleotidyltransferase activity                                                          | Risk | 1.7182  | 0.5685 | 0.0042 | 0.1652 |
| Risk_group | [MF]tRNA specific ribonuclease activity                                                           | Risk | 1.7182  | 0.5685 | 0.0042 | 0.1652 |
| Risk_group | [MF]Type II site specific deoxyribonuclease activity                                              | Risk | 1.8363  | 0.5998 | 0.0038 | 0.1652 |
| Risk_group | [MF]5 carboxyamino imidazole ribonucleotide mutase activity                                       | Risk | 2.3407  | 0.7876 | 0.0048 | 0.1658 |
| Risk_group | [MF]protein glutamine N methyltransferase activity                                                | Risk | 2.3107  | 0.7826 | 0.0051 | 0.1665 |
| Risk_group | [MF]single stranded DNA endodeoxyribonuclease activity                                            | Risk | 1.2198  | 0.4128 | 0.0051 | 0.1665 |
| Risk_group | [MF]1 deoxy D xylulose 5 phosphate reductoisomerase activity                                      | Risk | 1.7623  | 0.6198 | 0.0068 | 0.1671 |
| Risk_group | [MF]3 oxoacyl acyl carrier protein reductase NADPH activity                                       | Risk | 2.6836  | 0.9470 | 0.0070 | 0.1671 |
| Risk_group | [MF]adenine phosphoribosyltransferase activity                                                    | Risk | -0.5454 | 0.1884 | 0.0059 | 0.1671 |
| Risk_group | [MF]dTDP 4 dehydrorhamnose 3 5 epimerase activity                                                 | Risk | 2.0246  | 0.7028 | 0.0062 | 0.1671 |
| Risk_group | [MF]glucose 1 phosphate adenylyltransferase activity                                              | Risk | 2.3956  | 0.8413 | 0.0067 | 0.1671 |
| Risk_group | [MF]IMP cyclohydrolase activity                                                                   | Risk | 2.6137  | 0.9178 | 0.0067 | 0.1671 |
| Risk_group | [MF]L phenylalanine 2 oxoglutarate aminotransferase activity                                      | Risk | 2.8154  | 0.9756 | 0.0061 | 0.1671 |
| Risk_group | [MF]oxidoreductase activity acting on the aldehyde or oxo group of donors NAD or NADP as acceptor | Risk | -0.2308 | 0.0817 | 0.0072 | 0.1671 |
| Risk_group | [MF]oxidoreductase activity acting on the CH NH2 group of donors NAD or NADP as acceptor          | Risk | 2.0891  | 0.7144 | 0.0055 | 0.1671 |
| Risk_group | [MF]phosphoribosylaminoimidazolecarboxamide formyltransferase activity                            | Risk | 2.6137  | 0.9178 | 0.0067 | 0.1671 |
| Risk_group | [MF]protein dimerization activity                                                                 | Risk | 1.9959  | 0.7013 | 0.0068 | 0.1671 |
| Risk_group | [MF]ribosomal large subunit binding                                                               | Risk | -0.3442 | 0.1216 | 0.0070 | 0.1671 |
| Risk_group | [MF]tryptophan synthase activity                                                                  | Risk | 2.1310  | 0.7314 | 0.0056 | 0.1671 |
| Risk_group | [MF]3 iron 4 sulfur cluster binding                                                               | Risk | 1.4282  | 0.5124 | 0.0079 | 0.1726 |
| Risk_group | [MF]3 isopropylmalate dehydratase activity                                                        | Risk | 1.7017  | 0.6097 | 0.0078 | 0.1726 |



|            |                                                                                  |      |         |        |        |        |
|------------|----------------------------------------------------------------------------------|------|---------|--------|--------|--------|
| Risk_group | [MF]4 hydroxy 3 methylbut 2 en 1 yl diphosphate reductase activity               | Risk | 1.4282  | 0.5124 | 0.0079 | 0.1726 |
| Risk_group | [MF]fructose bisphosphate aldolase activity                                      | Risk | 2.5088  | 0.9011 | 0.0079 | 0.1726 |
| Risk_group | [MF]pyridoxal phosphate binding                                                  | Risk | 0.2943  | 0.1053 | 0.0077 | 0.1726 |
| Risk_group | [MF]anthranilate phosphoribosyltransferase activity                              | Risk | 1.4311  | 0.5190 | 0.0085 | 0.1727 |
| Risk_group | [MF]carbon nitrogen ligase activity with glutamine as amido N donor              | Risk | -0.9445 | 0.3414 | 0.0083 | 0.1727 |
| Risk_group | [MF]phosphoribosylanthranilate isomerase activity                                | Risk | 1.7482  | 0.6335 | 0.0085 | 0.1727 |
| Risk_group | [MF]thiaminase activity                                                          | Risk | 1.5187  | 0.5479 | 0.0082 | 0.1727 |
| Risk_group | [MF]1 4 dihydroxy 2 naphthoate octaprenyltransferase activity                    | Risk | 1.6232  | 0.5944 | 0.0091 | 0.1738 |
| Risk_group | [MF]dihydroxy acid dehydratase activity                                          | Risk | 1.6361  | 0.5988 | 0.0091 | 0.1738 |
| Risk_group | [MF]isocitrate dehydrogenase NADP activity                                       | Risk | 1.0155  | 0.3711 | 0.0090 | 0.1738 |
| Risk_group | [MF]3 isopropylmalate dehydrogenase activity                                     | Risk | 1.4820  | 0.5454 | 0.0095 | 0.1746 |
| Risk_group | [MF]ketol acid reductoisomerase activity                                         | Risk | 1.7898  | 0.6591 | 0.0095 | 0.1746 |
| Risk_group | [MF]metallopeptidase activity                                                    | Risk | -0.8342 | 0.3071 | 0.0095 | 0.1746 |
| Risk_group | [MF]protein serine threonine tyrosine kinase activity                            | Risk | -1.2228 | 0.4535 | 0.0100 | 0.1752 |
| Risk_group | [MF]thiamine phosphate diphosphorylase activity                                  | Risk | 2.2050  | 0.8166 | 0.0099 | 0.1752 |
| Risk_group | [MF]transferase activity transferring amino acyl groups                          | Risk | 1.7758  | 0.6576 | 0.0099 | 0.1752 |
| Risk_group | [MF]D alanine poly phosphoribitol ligase activity                                | Risk | -1.4988 | 0.5591 | 0.0104 | 0.1780 |
| Risk_group | [MF]acetylglutamate kinase activity                                              | Risk | 1.3511  | 0.5080 | 0.0110 | 0.1801 |
| Risk_group | [MF]alpha 1 4 glucosidase activity                                               | Risk | 0.3282  | 0.1229 | 0.0106 | 0.1801 |
| Risk_group | [MF]ATP phosphoribosyltransferase activity                                       | Risk | 1.7391  | 0.6539 | 0.0109 | 0.1801 |
| Risk_group | [MF]maltose alpha glucosidase activity                                           | Risk | 0.3282  | 0.1229 | 0.0106 | 0.1801 |
| Risk_group | [MF]N2 acetyl L ornithine 2 oxoglutarate 5 aminotransferase activity             | Risk | 1.7256  | 0.6477 | 0.0108 | 0.1801 |
| Risk_group | [MF]NAD binding                                                                  | Risk | 0.2481  | 0.0932 | 0.0109 | 0.1801 |
| Risk_group | [MF]alpha L fucosidase activity                                                  | Risk | 0.9252  | 0.3509 | 0.0116 | 0.1809 |
| Risk_group | [MF]oxidoreductase activity acting on a sulfur group of donors NAD P as acceptor | Risk | 1.6827  | 0.6366 | 0.0114 | 0.1809 |

|            |                                                                                                            |      |         |        |        |        |
|------------|------------------------------------------------------------------------------------------------------------|------|---------|--------|--------|--------|
| Risk_group | [MF]peptide transporter activity                                                                           | Risk | -1.7493 | 0.6644 | 0.0117 | 0.1809 |
| Risk_group | [MF]deoxyribonuclease IV phage T4 induced activity                                                         | Risk | 1.7187  | 0.6592 | 0.0125 | 0.1823 |
| Risk_group | [MF]L threonine ammonia lyase activity                                                                     | Risk | 1.8227  | 0.7009 | 0.0127 | 0.1836 |
| Risk_group | [MF]1 5 phosphoribosyl 5 5 phosphoribosylamino methylideneamino imidazole 4 carboxamide isomerase activity | Risk | 0.7725  | 0.3016 | 0.0140 | 0.1837 |
| Risk_group | [MF]acetyl CoA L glutamate N acetyltransferase activity                                                    | Risk | 1.7150  | 0.6648 | 0.0134 | 0.1837 |
| Risk_group | [MF]amidase activity                                                                                       | Risk | -1.8237 | 0.7123 | 0.0140 | 0.1837 |
| Risk_group | [MF]glutamate N acetyltransferase activity                                                                 | Risk | 1.7150  | 0.6648 | 0.0134 | 0.1837 |
| Risk_group | [MF]glutamate tRNA ligase activity                                                                         | Risk | 0.2644  | 0.1021 | 0.0131 | 0.1837 |
| Risk_group | [MF]histidinol dehydrogenase activity                                                                      | Risk | 1.8141  | 0.7069 | 0.0138 | 0.1837 |
| Risk_group | [MF]imidazoleglycerol phosphate synthase activity                                                          | Risk | 1.0834  | 0.4192 | 0.0132 | 0.1837 |
| Risk_group | [MF]NAD synthase activity                                                                                  | Risk | -0.3440 | 0.1328 | 0.0131 | 0.1837 |
| Risk_group | [MF]putrescine importing ATPase activity                                                                   | Risk | -1.3373 | 0.5201 | 0.0137 | 0.1837 |
| Risk_group | [MF]spermidine importing ATPase activity                                                                   | Risk | -1.3374 | 0.5201 | 0.0137 | 0.1837 |
| Risk_group | [MF]calcium transporting ATPase activity                                                                   | Risk | 0.3569  | 0.1402 | 0.0146 | 0.1885 |
| Risk_group | [MF]D alanyl carrier activity                                                                              | Risk | -1.3063 | 0.5188 | 0.0156 | 0.1929 |
| Risk_group | [MF]tripeptide aminopeptidase activity                                                                     | Risk | -0.8611 | 0.3434 | 0.0160 | 0.1942 |
| Risk_group | [MF]tRNA adenylyltransferase activity                                                                      | Risk | -0.7193 | 0.2880 | 0.0164 | 0.1962 |
| Risk_group | [MF]glutamate racemase activity                                                                            | Risk | -1.2524 | 0.5029 | 0.0167 | 0.1991 |
| Risk_group | [MF]succinyl diaminopimelate desuccinylase activity                                                        | Risk | 1.6814  | 0.6787 | 0.0172 | 0.2028 |
| Risk_group | [MF]exoribonuclease activity producing 5 phosphomonoesters                                                 | Risk | 1.4533  | 0.5885 | 0.0176 | 0.2038 |
| Risk_group | [MF]tagatose 6 phosphate kinase activity                                                                   | Risk | -1.3479 | 0.5459 | 0.0176 | 0.2038 |
| Risk_group | [MF]acetolactate synthase activity                                                                         | Risk | 2.0064  | 0.8153 | 0.0179 | 0.2068 |
| Risk_group | [MF]N acetylglucosamine transmembrane transporter activity                                                 | Risk | 1.6692  | 0.6790 | 0.0181 | 0.2068 |
| Risk_group | [MF]ribonuclease M5 activity                                                                               | Risk | -1.3261 | 0.5413 | 0.0184 | 0.2072 |
| Risk_group | [MF]imidazoleglycerol phosphate dehydratase activity                                                       | Risk | 1.5051  | 0.6159 | 0.0187 | 0.2081 |
| Risk_group | [MF]N methyltransferase activity                                                                           | Risk | -0.5939 | 0.2430 | 0.0187 | 0.2081 |

|            |                                                                                        |      |         |        |        |        |
|------------|----------------------------------------------------------------------------------------|------|---------|--------|--------|--------|
| Risk_group | [MF]cysteine type endopeptidase activity                                               | Risk | -1.2245 | 0.5013 | 0.0188 | 0.2081 |
| Risk_group | [MF]2 3 4 5 tetrahydropyridine 2 6 dicarboxylate N succinyltransferase activity        | Risk | 1.6399  | 0.6738 | 0.0192 | 0.2088 |
| Risk_group | [MF]cystathionine beta lyase activity                                                  | Risk | 1.1576  | 0.4763 | 0.0193 | 0.2088 |
| Risk_group | [MF]nicotinate nucleotide diphosphorylase carboxylating activity                       | Risk | 0.2987  | 0.1227 | 0.0192 | 0.2088 |
| Risk_group | [MF]aminoacylase activity                                                              | Risk | 0.2438  | 0.1011 | 0.0202 | 0.2119 |
| Risk_group | [MF]rRNA cytosine N4 methyltransferase activity                                        | Risk | 0.2245  | 0.0931 | 0.0203 | 0.2119 |
| Risk_group | [MF]6 phosphofructokinase activity                                                     | Risk | -0.6741 | 0.2798 | 0.0204 | 0.2122 |
| Risk_group | [MF]peroxiredoxin activity                                                             | Risk | 1.7941  | 0.7464 | 0.0206 | 0.2137 |
| Risk_group | [MF]manganese ion transmembrane transporter activity                                   | Risk | 1.3580  | 0.5660 | 0.0208 | 0.2150 |
| Risk_group | [MF]5 3 exoribonuclease activity                                                       | Risk | -1.7468 | 0.7296 | 0.0211 | 0.2166 |
| Risk_group | [MF]sodium dicarboxylate symporter activity                                            | Risk | -1.0317 | 0.4318 | 0.0213 | 0.2180 |
| Risk_group | [MF]5 10 methylenetetrahydrofolate dependent tRNA m5U54 methyltransferase activity     | Risk | -0.5710 | 0.2403 | 0.0220 | 0.2215 |
| Risk_group | [MF]methylenetetrahydrofolate tRNA uracil 5 methyltransferase FADH2 oxidizing activity | Risk | -0.5710 | 0.2403 | 0.0220 | 0.2215 |
| Risk_group | [MF]indole 3 glycerol phosphate synthase activity                                      | Risk | 1.2477  | 0.5274 | 0.0226 | 0.2230 |
| Risk_group | [MF]uracil DNA N glycosylase activity                                                  | Risk | -1.3205 | 0.5597 | 0.0229 | 0.2256 |
| Risk_group | [MF]transferase activity transferring acyl groups other than amino acyl groups         | Risk | -0.2457 | 0.1043 | 0.0232 | 0.2263 |
| Risk_group | [MF]aminoacyl tRNA editing activity                                                    | Risk | 0.2756  | 0.1175 | 0.0237 | 0.2293 |
| Risk_group | [MF]CDP glycerol glycerophosphotransferase activity                                    | Risk | -1.6021 | 0.6867 | 0.0244 | 0.2318 |
| Risk_group | [MF]DNA N glycosylase activity                                                         | Risk | -0.6358 | 0.2725 | 0.0244 | 0.2318 |
| Risk_group | [MF]lysozyme activity                                                                  | Risk | -0.9180 | 0.3933 | 0.0243 | 0.2318 |
| Risk_group | [MF]aminoacyl tRNA ligase activity                                                     | Risk | -0.7924 | 0.3400 | 0.0246 | 0.2319 |
| Risk_group | [MF]peptidyl prolyl cis trans isomerase activity                                       | Risk | 0.2464  | 0.1058 | 0.0246 | 0.2319 |
| Risk_group | [MF]L threonylcarbamoyladenylate synthase                                              | Risk | -1.1009 | 0.4730 | 0.0247 | 0.2322 |
| Risk_group | [MF]succinate dehydrogenase activity                                                   | Risk | -1.7440 | 0.7528 | 0.0254 | 0.2345 |
| Risk_group | [MF]phosphoribosylamine glycine ligase activity                                        | Risk | 2.4039  | 1.0410 | 0.0258 | 0.2352 |

|                           |                                                                                              |      |         |        |        |        |
|---------------------------|----------------------------------------------------------------------------------------------|------|---------|--------|--------|--------|
| Risk_group                | [MF]enzyme regulator activity                                                                | Risk | 1.1120  | 0.4830 | 0.0262 | 0.2368 |
| Risk_group                | [MF]homoserine kinase activity                                                               | Risk | 2.1293  | 0.9250 | 0.0262 | 0.2368 |
| Risk_group                | [MF]transferase activity transferring hexosyl groups                                         | Risk | 1.9836  | 0.8622 | 0.0263 | 0.2368 |
| Risk_group                | [MF]malate dehydrogenase decarboxylating NAD activity                                        | Risk | 1.4561  | 0.6357 | 0.0270 | 0.2402 |
| Risk_group                | [MF]sulfurtransferase activity                                                               | Risk | -0.2642 | 0.1155 | 0.0271 | 0.2403 |
| Risk_group                | [MF]polyamine binding                                                                        | Risk | -1.5592 | 0.6830 | 0.0274 | 0.2409 |
| Risk_group                | [MF]aspartate ammonia ligase activity                                                        | Risk | -1.3607 | 0.5986 | 0.0281 | 0.2429 |
| Risk_group                | [MF]deoxyguanosine kinase activity                                                           | Risk | -1.2685 | 0.5602 | 0.0287 | 0.2464 |
| Risk_group                | [MF]ADP binding                                                                              | Risk | -0.6040 | 0.2683 | 0.0295 | 0.2487 |
| Risk_group                | [MF]glucosamine 6 phosphate deaminase activity                                               | Risk | -0.4524 | 0.2014 | 0.0298 | 0.2492 |
| Risk_group                | [MF]rRNA methyltransferase activity                                                          | Risk | -1.6545 | 0.7365 | 0.0299 | 0.2492 |
| <b>Biological process</b> |                                                                                              |      |         |        |        |        |
| Delivery                  | [BP]respiratory electron transport chain                                                     | PTB  | 0.9109  | 0.2131 | 0.0001 | 0.1243 |
| Delivery                  | [BP]alginic acid biosynthetic process                                                        | PTB  | 0.4421  | 0.1508 | 0.0054 | 0.1809 |
| Delivery                  | [BP]AMP salvage                                                                              | PTB  | -0.3240 | 0.0887 | 0.0007 | 0.1809 |
| Delivery                  | [BP]ATP hydrolysis coupled proton transport                                                  | PTB  | 0.1730  | 0.0500 | 0.0012 | 0.1809 |
| Delivery                  | [BP]folic acid biosynthetic process                                                          | PTB  | 0.8304  | 0.2748 | 0.0042 | 0.1809 |
| Delivery                  | [BP]glucose catabolic process                                                                | PTB  | 0.6332  | 0.2053 | 0.0036 | 0.1809 |
| Delivery                  | [BP]pentose phosphate shunt non oxidative branch                                             | PTB  | -0.1468 | 0.0488 | 0.0044 | 0.1809 |
| Delivery                  | [BP]peptidyl L beta methylthioaspartic acid biosynthetic process from peptidyl aspartic acid | PTB  | 0.4434  | 0.1405 | 0.0029 | 0.1809 |
| Delivery                  | [BP]protein tetramerization                                                                  | PTB  | -1.2026 | 0.3659 | 0.0020 | 0.1809 |
| Delivery                  | [BP]RNA modification                                                                         | PTB  | 0.5130  | 0.1707 | 0.0044 | 0.1809 |
| Delivery                  | [BP]RNA repair                                                                               | PTB  | -1.8043 | 0.6032 | 0.0046 | 0.1809 |
| Delivery                  | [BP]sporulation resulting in formation of a cellular spore                                   | PTB  | 0.7151  | 0.2155 | 0.0019 | 0.1809 |
| Delivery                  | [BP]ATP synthesis coupled electron transport                                                 | PTB  | 0.6788  | 0.2336 | 0.0058 | 0.1906 |
| Delivery                  | [BP]1 deoxy D xylulose 5 phosphate biosynthetic process                                      | PTB  | -1.5067 | 0.5510 | 0.0090 | 0.1909 |

|          |                                                                     |     |         |        |        |        |
|----------|---------------------------------------------------------------------|-----|---------|--------|--------|--------|
| Delivery | [BP]ATP synthesis coupled proton transport                          | PTB | 0.5726  | 0.2007 | 0.0066 | 0.1909 |
| Delivery | [BP]cellular response to stress                                     | PTB | 0.4363  | 0.1543 | 0.0071 | 0.1909 |
| Delivery | [BP]deoxyribonucleoside monophosphate catabolic process             | PTB | -0.5483 | 0.2068 | 0.0112 | 0.1909 |
| Delivery | [BP]DNA unwinding involved in DNA replication                       | PTB | 1.5541  | 0.5866 | 0.0112 | 0.1909 |
| Delivery | [BP]histidine catabolic process to glutamate and formamide          | PTB | 0.4948  | 0.1762 | 0.0075 | 0.1909 |
| Delivery | [BP]histidine catabolic process to glutamate and formate            | PTB | 0.4948  | 0.1762 | 0.0075 | 0.1909 |
| Delivery | [BP]intein mediated protein splicing                                | PTB | 0.3442  | 0.1245 | 0.0084 | 0.1909 |
| Delivery | [BP]misfolded or incompletely synthesized protein catabolic process | PTB | 0.4180  | 0.1572 | 0.0109 | 0.1909 |
| Delivery | [BP]purine nucleotide metabolic process                             | PTB | -0.1421 | 0.0527 | 0.0100 | 0.1909 |
| Delivery | [BP]tetrapyrrole biosynthetic process                               | PTB | 0.5733  | 0.2123 | 0.0099 | 0.1909 |
| Delivery | [BP]pyridoxine biosynthetic process                                 | PTB | 0.5672  | 0.2196 | 0.0133 | 0.2043 |
| Delivery | [BP]peptidoglycan turnover                                          | PTB | 0.3930  | 0.1534 | 0.0140 | 0.2060 |
| Delivery | [BP]S adenosylmethionine biosynthetic process                       | PTB | 0.1682  | 0.0655 | 0.0138 | 0.2060 |
| Delivery | [BP]regulation of sporulation                                       | PTB | -0.1571 | 0.0622 | 0.0153 | 0.2080 |
| Delivery | [BP]protein transport by the Tat complex                            | PTB | 0.4000  | 0.1590 | 0.0157 | 0.2110 |
| Delivery | [BP]lactose metabolic process                                       | PTB | -0.8066 | 0.3219 | 0.0161 | 0.2130 |
| Delivery | [BP]teichoic acid biosynthetic process                              | PTB | -0.5893 | 0.2380 | 0.0173 | 0.2144 |
| Delivery | [BP]fumarate metabolic process                                      | PTB | -1.4314 | 0.5863 | 0.0188 | 0.2150 |
| Delivery | [BP]toxin biosynthetic process                                      | PTB | -0.6149 | 0.2523 | 0.0190 | 0.2150 |
| Delivery | [BP]tRNA processing                                                 | PTB | 0.1303  | 0.0534 | 0.0189 | 0.2150 |
| Delivery | [BP]rRNA 5' end processing                                          | PTB | -0.5042 | 0.2081 | 0.0197 | 0.2168 |
| Delivery | [BP]iron ion transport                                              | PTB | 0.3872  | 0.1600 | 0.0198 | 0.2171 |
| Delivery | [BP]biotin biosynthetic process                                     | PTB | 0.6279  | 0.2619 | 0.0209 | 0.2218 |
| Delivery | [BP]iron ion homeostasis                                            | PTB | 0.4557  | 0.1898 | 0.0207 | 0.2218 |
| Delivery | [BP]electron transport chain                                        | PTB | 0.6624  | 0.2860 | 0.0254 | 0.2404 |
| Delivery | [BP]thiamine diphosphate biosynthetic process                       | PTB | 0.1764  | 0.0774 | 0.0277 | 0.2490 |
| Delivery | [BP]cellular metabolic process                                      | PTB | 0.6600  | 0.2905 | 0.0282 | 0.2493 |

|       |                                                  |     |         |        |        |        |
|-------|--------------------------------------------------|-----|---------|--------|--------|--------|
| LLETZ | [BP]adenine salvage                              | Yes | 0.5696  | 0.1609 | 0.0010 | 0.1809 |
| LLETZ | [BP]ATP hydrolysis coupled proton transport      | Yes | -0.2391 | 0.0706 | 0.0015 | 0.1809 |
| LLETZ | [BP]cellular iron ion homeostasis                | Yes | -0.3595 | 0.1115 | 0.0024 | 0.1809 |
| LLETZ | [BP]glucuronate catabolic process                | Yes | -0.6367 | 0.2111 | 0.0043 | 0.1809 |
| LLETZ | [BP]regulation of DNA repair                     | Yes | 0.2939  | 0.0896 | 0.0021 | 0.1809 |
| LLETZ | [BP]barrier septum assembly                      | Yes | 0.2598  | 0.0980 | 0.0112 | 0.1909 |
| LLETZ | [BP]DNA biosynthetic process                     | Yes | 0.4012  | 0.1515 | 0.0113 | 0.1909 |
| LLETZ | [BP]fructose 6 phosphate metabolic process       | Yes | 0.6806  | 0.2426 | 0.0075 | 0.1909 |
| LLETZ | [BP]FtsZ dependent cytokinesis                   | Yes | 0.2980  | 0.1060 | 0.0074 | 0.1909 |
| LLETZ | [BP]mismatch repair                              | Yes | 0.7032  | 0.2549 | 0.0085 | 0.1909 |
| LLETZ | [BP]mRNA catabolic process                       | Yes | 0.4943  | 0.1759 | 0.0074 | 0.1909 |
| LLETZ | [BP]mRNA processing                              | Yes | 0.3891  | 0.1419 | 0.0088 | 0.1909 |
| LLETZ | [BP]regulation of carbohydrate metabolic process | Yes | 1.0905  | 0.3972 | 0.0088 | 0.1909 |
| LLETZ | [BP]response to redox state                      | Yes | 0.6904  | 0.2557 | 0.0099 | 0.1909 |
| LLETZ | [BP]rRNA catabolic process                       | Yes | 0.3895  | 0.1408 | 0.0083 | 0.1909 |
| LLETZ | [BP]SOS response                                 | Yes | 0.1104  | 0.0413 | 0.0106 | 0.1909 |
| LLETZ | [BP]tRNA thio modification                       | Yes | 0.6758  | 0.2511 | 0.0101 | 0.1909 |
| LLETZ | [BP]protein dephosphorylation                    | Yes | 0.6000  | 0.2330 | 0.0135 | 0.2053 |
| LLETZ | [BP]ATP synthesis coupled proton transport       | Yes | -0.7232 | 0.2834 | 0.0143 | 0.2060 |
| LLETZ | [BP]peptide metabolic process                    | Yes | 0.7825  | 0.3083 | 0.0148 | 0.2067 |
| LLETZ | [BP]chromosome segregation                       | Yes | 0.2397  | 0.0946 | 0.0151 | 0.2080 |
| LLETZ | [BP]D gluconate metabolic process                | Yes | 0.6848  | 0.2731 | 0.0160 | 0.2130 |
| LLETZ | [BP]D tagatose 6 phosphate catabolic process     | Yes | 1.1914  | 0.4794 | 0.0169 | 0.2141 |
| LLETZ | [BP]dTTP biosynthetic process                    | Yes | 0.2410  | 0.0971 | 0.0171 | 0.2144 |
| LLETZ | [BP]asparaginyl tRNA aminoacylation              | Yes | 0.6120  | 0.2484 | 0.0178 | 0.2150 |
| LLETZ | [BP]DNA catabolic process                        | Yes | 0.3007  | 0.1233 | 0.0189 | 0.2150 |
| LLETZ | [BP]dTMP biosynthetic process                    | Yes | 0.2370  | 0.0963 | 0.0179 | 0.2150 |
| LLETZ | [BP]enterobactin biosynthetic process            | Yes | -0.8863 | 0.3608 | 0.0182 | 0.2150 |
| LLETZ | [BP]lipoteichoic acid biosynthetic process       | Yes | 1.2089  | 0.4952 | 0.0188 | 0.2150 |
| LLETZ | [BP]regulation of translational termination      | Yes | 0.6025  | 0.2449 | 0.0180 | 0.2150 |

|                   |                                                   |             |         |        |        |        |
|-------------------|---------------------------------------------------|-------------|---------|--------|--------|--------|
| LLETZ             | [BP]teichoic acid biosynthetic process            | Yes         | 0.8173  | 0.3360 | 0.0192 | 0.2150 |
| LLETZ             | [BP]lactose metabolic process                     | Yes         | 1.0899  | 0.4544 | 0.0209 | 0.2218 |
| LLETZ             | [BP]rRNA base methylation                         | Yes         | -0.2190 | 0.0911 | 0.0205 | 0.2218 |
| LLETZ             | [BP]toxin biosynthetic process                    | Yes         | 0.8571  | 0.3562 | 0.0205 | 0.2218 |
| LLETZ             | [BP]tRNA 5 leader removal                         | Yes         | 0.6212  | 0.2614 | 0.0220 | 0.2289 |
| LLETZ             | [BP]selenocysteine biosynthetic process           | Yes         | 0.2988  | 0.1271 | 0.0234 | 0.2355 |
| LLETZ             | [BP]selenocysteinyl tRNA Sec biosynthetic process | Yes         | 0.2988  | 0.1271 | 0.0234 | 0.2355 |
| LLETZ             | [BP]seryl tRNA aminoacylation                     | Yes         | 0.2986  | 0.1271 | 0.0235 | 0.2355 |
| LLETZ             | [BP]protein polymerization                        | Yes         | 0.3718  | 0.1587 | 0.0238 | 0.2367 |
| LLETZ             | [BP]DNA modification                              | Yes         | 1.0823  | 0.4661 | 0.0250 | 0.2402 |
| LLETZ             | [BP]purine nucleotide metabolic process           | Yes         | 0.1722  | 0.0744 | 0.0255 | 0.2404 |
| LLETZ             | [BP]cell morphogenesis                            | Yes         | 0.2247  | 0.0976 | 0.0262 | 0.2441 |
| LLETZ             | [BP]RNA catabolic process                         | Yes         | 0.4919  | 0.2152 | 0.0272 | 0.2483 |
| LLETZ             | [BP]pyrimidine nucleotide metabolic process       | Yes         | 0.5212  | 0.2299 | 0.0284 | 0.2493 |
| LLETZ             | [BP]tRNA modification                             | Yes         | 0.2522  | 0.1112 | 0.0283 | 0.2493 |
| Outcome_grou<br>p | [BP]acetoin catabolic process                     | no-risk_PTB | 1.5942  | 0.5395 | 0.0051 | 0.1809 |
| Outcome_grou<br>p | [BP]polyphosphate metabolic process               | no-risk_PTB | 1.5008  | 0.4170 | 0.0008 | 0.1809 |
| Outcome_grou<br>p | [BP]protein processing                            | no-risk_PTB | 1.9272  | 0.6379 | 0.0042 | 0.1809 |
| Outcome_grou<br>p | [BP]regulation of protein stability               | no-risk_PTB | 1.4226  | 0.5062 | 0.0074 | 0.1909 |
| Outcome_grou<br>p | [BP]protein transport by the Tat complex          | no-risk_PTB | 1.0483  | 0.4124 | 0.0147 | 0.2060 |
| Outcome_grou<br>p | [BP]alginic acid biosynthetic process             | no-risk_PTB | 0.9673  | 0.3912 | 0.0174 | 0.2150 |
| Outcome_grou<br>p | [BP]nucleotide salvage                            | no-risk_PTB | 1.6248  | 0.6698 | 0.0195 | 0.2164 |
| Outcome_grou<br>p | [BP]D ribose catabolic process                    | no-risk_PTB | 2.7768  | 1.1672 | 0.0219 | 0.2283 |

|              |                                                    |     |         |        |        |        |
|--------------|----------------------------------------------------|-----|---------|--------|--------|--------|
| Previous_PTB | [BP]cellular iron ion homeostasis                  | Yes | -0.4977 | 0.1160 | 0.0001 | 0.1243 |
| Previous_PTB | [BP]adenine salvage                                | Yes | 0.6553  | 0.1674 | 0.0003 | 0.1392 |
| Previous_PTB | [BP]dTTP biosynthetic process                      | Yes | 0.3923  | 0.1010 | 0.0004 | 0.1392 |
| Previous_PTB | [BP]enterobactin biosynthetic process              | Yes | -1.4144 | 0.3754 | 0.0005 | 0.1521 |
| Previous_PTB | [BP]FtsZ dependent cytokinesis                     | Yes | 0.4144  | 0.1103 | 0.0005 | 0.1521 |
| Previous_PTB | [BP]ATP hydrolysis coupled proton transport        | Yes | -0.2607 | 0.0734 | 0.0009 | 0.1809 |
| Previous_PTB | [BP]barrier septum assembly                        | Yes | 0.3243  | 0.1020 | 0.0027 | 0.1809 |
| Previous_PTB | [BP]branched chain amino acid biosynthetic process | Yes | -1.7570 | 0.5741 | 0.0038 | 0.1809 |
| Previous_PTB | [BP]cell cycle                                     | Yes | 0.2405  | 0.0782 | 0.0036 | 0.1809 |
| Previous_PTB | [BP]chromosome segregation                         | Yes | 0.3327  | 0.0984 | 0.0016 | 0.1809 |
| Previous_PTB | [BP]DNA catabolic process                          | Yes | 0.4042  | 0.1283 | 0.0030 | 0.1809 |
| Previous_PTB | [BP]dTMP biosynthetic process                      | Yes | 0.2990  | 0.1001 | 0.0047 | 0.1809 |
| Previous_PTB | [BP]leucyl tRNA aminoacylation                     | Yes | -1.9093 | 0.6478 | 0.0052 | 0.1809 |
| Previous_PTB | [BP]lipoteichoic acid biosynthetic process         | Yes | 1.5375  | 0.5151 | 0.0047 | 0.1809 |
| Previous_PTB | [BP]mRNA processing                                | Yes | 0.4798  | 0.1476 | 0.0022 | 0.1809 |
| Previous_PTB | [BP]proteolysis                                    | Yes | -1.3037 | 0.4218 | 0.0035 | 0.1809 |
| Previous_PTB | [BP]pyridoxal 5 phosphate salvage                  | Yes | -1.8951 | 0.6435 | 0.0052 | 0.1809 |
| Previous_PTB | [BP]regulation of carbohydrate metabolic process   | Yes | 1.2717  | 0.4132 | 0.0036 | 0.1809 |
| Previous_PTB | [BP]regulation of cell shape                       | Yes | 0.2208  | 0.0697 | 0.0028 | 0.1809 |
| Previous_PTB | [BP]rRNA base methylation                          | Yes | -0.3342 | 0.0947 | 0.0010 | 0.1809 |
| Previous_PTB | [BP]rRNA catabolic process                         | Yes | 0.4911  | 0.1465 | 0.0017 | 0.1809 |
| Previous_PTB | [BP]selenocysteine biosynthetic process            | Yes | 0.3892  | 0.1322 | 0.0052 | 0.1809 |
| Previous_PTB | [BP]selenocysteinyl tRNA Sec biosynthetic process  | Yes | 0.3892  | 0.1322 | 0.0052 | 0.1809 |
| Previous_PTB | [BP]seryl tRNA aminoacylation                      | Yes | 0.3875  | 0.1322 | 0.0054 | 0.1809 |
| Previous_PTB | [BP]threonine catabolic process                    | Yes | -1.6016 | 0.5452 | 0.0053 | 0.1809 |
| Previous_PTB | [BP]tRNA modification                              | Yes | 0.3413  | 0.1156 | 0.0051 | 0.1809 |
| Previous_PTB | [BP]amino acid transport                           | Yes | -1.6736 | 0.5886 | 0.0068 | 0.1909 |
| Previous_PTB | [BP]branched chain amino acid metabolic process    | Yes | -1.4346 | 0.5348 | 0.0103 | 0.1909 |
| Previous_PTB | [BP]carbon utilization                             | Yes | -1.4011 | 0.5153 | 0.0094 | 0.1909 |
| Previous_PTB | [BP]cell division                                  | Yes | 0.1895  | 0.0701 | 0.0098 | 0.1909 |



|              |                                                                                          |     |         |        |        |        |
|--------------|------------------------------------------------------------------------------------------|-----|---------|--------|--------|--------|
| Previous_PTB | [BP]cellular amino acid catabolic process                                                | Yes | -1.4472 | 0.5430 | 0.0108 | 0.1909 |
| Previous_PTB | [BP]D gluconate metabolic process                                                        | Yes | 0.7945  | 0.2841 | 0.0077 | 0.1909 |
| Previous_PTB | [BP]D tagatose 6 phosphate catabolic process                                             | Yes | 1.3846  | 0.4986 | 0.0081 | 0.1909 |
| Previous_PTB | [BP]dimethylallyl diphosphate biosynthetic process                                       | Yes | -1.5814 | 0.5761 | 0.0088 | 0.1909 |
| Previous_PTB | [BP]DNA biosynthetic process                                                             | Yes | 0.4179  | 0.1576 | 0.0111 | 0.1909 |
| Previous_PTB | [BP]GTP metabolic process                                                                | Yes | -2.0219 | 0.7652 | 0.0114 | 0.1909 |
| Previous_PTB | [BP]IMP biosynthetic process                                                             | Yes | -0.8607 | 0.3230 | 0.0108 | 0.1909 |
| Previous_PTB | [BP]iron sulfur cluster assembly                                                         | Yes | 1.1702  | 0.4341 | 0.0100 | 0.1909 |
| Previous_PTB | [BP]isocitrate metabolic process                                                         | Yes | -0.8433 | 0.3010 | 0.0076 | 0.1909 |
| Previous_PTB | [BP]isopentenyl diphosphate biosynthetic process<br>methylerythritol 4 phosphate pathway | Yes | -2.2932 | 0.7979 | 0.0063 | 0.1909 |
| Previous_PTB | [BP]lactose metabolic process                                                            | Yes | 1.2484  | 0.4727 | 0.0115 | 0.1909 |
| Previous_PTB | [BP]leucine biosynthetic process                                                         | Yes | -1.6920 | 0.6147 | 0.0086 | 0.1909 |
| Previous_PTB | [BP]lipid glycosylation                                                                  | Yes | 0.2913  | 0.1076 | 0.0097 | 0.1909 |
| Previous_PTB | [BP]mismatch repair                                                                      | Yes | 0.7134  | 0.2652 | 0.0101 | 0.1909 |
| Previous_PTB | [BP]mRNA catabolic process                                                               | Yes | 0.5259  | 0.1830 | 0.0063 | 0.1909 |
| Previous_PTB | [BP]negative regulation of transcription<br>DNA templated                                | Yes | 0.1977  | 0.0689 | 0.0063 | 0.1909 |
| Previous_PTB | [BP]peptide metabolic process                                                            | Yes | 0.8813  | 0.3207 | 0.0087 | 0.1909 |
| Previous_PTB | [BP]protein dephosphorylation                                                            | Yes | 0.6615  | 0.2424 | 0.0092 | 0.1909 |
| Previous_PTB | [BP]regulation of DNA repair                                                             | Yes | 0.2664  | 0.0932 | 0.0065 | 0.1909 |
| Previous_PTB | [BP]response to redox state                                                              | Yes | 0.7450  | 0.2660 | 0.0076 | 0.1909 |
| Previous_PTB | [BP]teichoic acid biosynthetic process                                                   | Yes | 0.9202  | 0.3495 | 0.0117 | 0.1909 |
| Previous_PTB | [BP]terpenoid biosynthetic process                                                       | Yes | -2.3145 | 0.8521 | 0.0095 | 0.1909 |
| Previous_PTB | [BP]toxin biosynthetic process                                                           | Yes | 1.0141  | 0.3705 | 0.0090 | 0.1909 |
| Previous_PTB | [BP]tRNA 5 leader removal                                                                | Yes | 0.7294  | 0.2720 | 0.0103 | 0.1909 |
| Previous_PTB | [BP]tRNA thio modification                                                               | Yes | 0.7202  | 0.2612 | 0.0085 | 0.1909 |
| Previous_PTB | [BP]valine biosynthetic process                                                          | Yes | -1.8507 | 0.6851 | 0.0098 | 0.1909 |
| Previous_PTB | [BP]phosphatidylinositol phosphorylation                                                 | Yes | -2.0224 | 0.7691 | 0.0118 | 0.1913 |
| Previous_PTB | [BP]phosphate containing compound<br>metabolic                                           | Yes | -1.9288 | 0.7371 | 0.0122 | 0.1962 |

|              |                                                        |     |         |        |        |        |
|--------------|--------------------------------------------------------|-----|---------|--------|--------|--------|
|              | process                                                |     |         |        |        |        |
| Previous_PTB | [BP]proline biosynthetic process                       | Yes | -1.2920 | 0.4968 | 0.0127 | 0.2017 |
| Previous_PTB | [BP]DNA methylation                                    | Yes | 0.7192  | 0.2788 | 0.0134 | 0.2043 |
| Previous_PTB | [BP]peptidyl glutamine methylation                     | Yes | -1.8655 | 0.7227 | 0.0133 | 0.2043 |
| Previous_PTB | [BP]protein targeting                                  | Yes | 0.4046  | 0.1568 | 0.0134 | 0.2043 |
| Previous_PTB | [BP]protein polymerization                             | Yes | 0.4228  | 0.1651 | 0.0140 | 0.2060 |
| Previous_PTB | [BP]regulation of nitrogen utilization                 | Yes | -1.1399 | 0.4449 | 0.0140 | 0.2060 |
| Previous_PTB | [BP]tryptophan biosynthetic process                    | Yes | -2.0012 | 0.7801 | 0.0139 | 0.2060 |
| Previous_PTB | [BP]fructose 6 phosphate metabolic process             | Yes | 0.6453  | 0.2524 | 0.0142 | 0.2060 |
| Previous_PTB | [BP]glutamate biosynthetic process                     | Yes | -1.5374 | 0.6039 | 0.0146 | 0.2060 |
| Previous_PTB | [BP]modification dependent protein catabolic process   | Yes | -1.2090 | 0.4756 | 0.0147 | 0.2060 |
| Previous_PTB | [BP]glucose metabolic process                          | Yes | 0.2692  | 0.1067 | 0.0154 | 0.2080 |
| Previous_PTB | [BP]establishment of competence for transformation     | Yes | 1.1080  | 0.4425 | 0.0161 | 0.2130 |
| Previous_PTB | [BP]pathogenesis                                       | Yes | 1.3252  | 0.5306 | 0.0164 | 0.2141 |
| Previous_PTB | [BP]porphyrin containing compound biosynthetic process | Yes | -1.5628 | 0.6284 | 0.0168 | 0.2141 |
|              | process                                                |     |         |        |        |        |
| Previous_PTB | [BP]proteasomal protein catabolic process              | Yes | -1.3215 | 0.5304 | 0.0167 | 0.2141 |
| Previous_PTB | [BP]response to stress                                 | Yes | -0.1685 | 0.0678 | 0.0168 | 0.2141 |
| Previous_PTB | [BP]vitamin B6 biosynthetic process                    | Yes | -1.8674 | 0.7539 | 0.0173 | 0.2144 |
| Previous_PTB | [BP]cell wall organization                             | Yes | 0.1542  | 0.0631 | 0.0187 | 0.2150 |
| Previous_PTB | [BP]cellular amino acid metabolic process              | Yes | -0.1653 | 0.0672 | 0.0180 | 0.2150 |
| Previous_PTB | [BP]dUMP biosynthetic process                          | Yes | -1.8463 | 0.7575 | 0.0190 | 0.2150 |
| Previous_PTB | [BP]glycogen biosynthetic process                      | Yes | -2.0207 | 0.8233 | 0.0182 | 0.2150 |
| Previous_PTB | [BP]purine nucleotide metabolic process                | Yes | 0.1892  | 0.0774 | 0.0186 | 0.2150 |
| Previous_PTB | [BP]pyridoxal phosphate biosynthetic process           | Yes | -2.0157 | 0.8232 | 0.0185 | 0.2150 |
| Previous_PTB | [BP]glucuronate catabolic process                      | Yes | -0.5335 | 0.2196 | 0.0194 | 0.2157 |
| Previous_PTB | [BP]cell morphogenesis                                 | Yes | 0.2453  | 0.1015 | 0.0200 | 0.2183 |
| Previous_PTB | [BP]DNA dependent DNA replication                      | Yes | 1.2815  | 0.5336 | 0.0207 | 0.2218 |
| Previous_PTB | [BP]primary metabolic process                          | Yes | 0.8664  | 0.3618 | 0.0211 | 0.2218 |
| Previous_PTB | [BP]dTDP biosynthetic process                          | Yes | 1.0443  | 0.4373 | 0.0214 | 0.2243 |

|              |                                                        |      |         |        |        |        |
|--------------|--------------------------------------------------------|------|---------|--------|--------|--------|
| Previous_PTB | [BP]carbohydrate transport                             | Yes  | -2.5026 | 1.0545 | 0.0222 | 0.2294 |
| Previous_PTB | [BP]extracellular polysaccharide biosynthetic process  | Yes  | -1.2546 | 0.5293 | 0.0223 | 0.2301 |
| Previous_PTB | [BP]positive regulation of transcription DNA templated | Yes  | -1.5989 | 0.6770 | 0.0228 | 0.2338 |
| Previous_PTB | [BP]regulation of pH                                   | Yes  | -1.4884 | 0.6353 | 0.0238 | 0.2367 |
| Previous_PTB | [BP]arginine biosynthetic process via ornithine        | Yes  | -1.8856 | 0.8071 | 0.0242 | 0.2380 |
| Previous_PTB | [BP]DNA modification                                   | Yes  | 1.1328  | 0.4848 | 0.0242 | 0.2380 |
| Previous_PTB | [BP]ATP synthesis coupled proton transport             | Yes  | -0.6816 | 0.2948 | 0.0256 | 0.2409 |
| Previous_PTB | [BP]threonine biosynthetic process                     | Yes  | -1.9412 | 0.8448 | 0.0265 | 0.2448 |
| Previous_PTB | [BP]tRNA threonylcarbamoyladenosine modification       | Yes  | 0.3505  | 0.1524 | 0.0264 | 0.2448 |
| Previous_PTB | [BP]positive regulation of translation                 | Yes  | -2.2586 | 0.9845 | 0.0267 | 0.2455 |
| Previous_PTB | [BP]isoleucine biosynthetic process                    | Yes  | -2.1341 | 0.9333 | 0.0272 | 0.2483 |
| Previous_PTB | [BP]rRNA methylation                                   | Yes  | 0.8210  | 0.3596 | 0.0274 | 0.2490 |
| Previous_PTB | [BP]DNA unwinding involved in DNA replication          | Yes  | 1.9593  | 0.8614 | 0.0280 | 0.2493 |
| Previous_PTB | [BP]regulation of translational termination            | Yes  | 0.5787  | 0.2548 | 0.0282 | 0.2493 |
| Risk_group   | [BP]cellular iron ion homeostasis                      | Risk | 0.4973  | 0.1255 | 0.0003 | 0.1392 |
| Risk_group   | [BP]enterobactin biosynthetic process                  | Risk | 1.5886  | 0.4062 | 0.0003 | 0.1392 |
| Risk_group   | [BP]adenine salvage                                    | Risk | -0.5520 | 0.1811 | 0.0039 | 0.1809 |
| Risk_group   | [BP]arginine biosynthetic process via ornithine        | Risk | 2.6751  | 0.8733 | 0.0038 | 0.1809 |
| Risk_group   | [BP]ATP hydrolysis coupled proton transport            | Risk | 0.2629  | 0.0795 | 0.0019 | 0.1809 |
| Risk_group   | [BP]carbon utilization                                 | Risk | 1.7300  | 0.5576 | 0.0034 | 0.1809 |
| Risk_group   | [BP]cellular amino acid catabolic process              | Risk | 1.8369  | 0.5875 | 0.0032 | 0.1809 |
| Risk_group   | [BP]dTTP biosynthetic process                          | Risk | -0.3341 | 0.1093 | 0.0038 | 0.1809 |
| Risk_group   | [BP]dUMP biosynthetic process                          | Risk | 2.4142  | 0.8196 | 0.0052 | 0.1809 |
| Risk_group   | [BP]FtsZ dependent cytokinesis                         | Risk | -0.3871 | 0.1193 | 0.0023 | 0.1809 |
| Risk_group   | [BP]glucuronate catabolic process                      | Risk | 0.7547  | 0.2377 | 0.0028 | 0.1809 |
| Risk_group   | [BP]GTP metabolic process                              | Risk | 2.5083  | 0.8280 | 0.0041 | 0.1809 |
| Risk_group   | [BP]L proline biosynthetic process                     | Risk | 2.6888  | 0.9163 | 0.0053 | 0.1809 |
| Risk_group   | [BP]leucine biosynthetic process                       | Risk | 2.1045  | 0.6652 | 0.0029 | 0.1809 |
| Risk_group   | [BP]leucyl tRNA aminoacylation                         | Risk | 2.3341  | 0.7009 | 0.0018 | 0.1809 |

|            |                                                                                       |      |         |        |        |        |
|------------|---------------------------------------------------------------------------------------|------|---------|--------|--------|--------|
| Risk_group | [BP]peptidyl glutamine methylation                                                    | Risk | 2.3094  | 0.7820 | 0.0051 | 0.1809 |
| Risk_group | [BP]phosphate containing compound metabolic process                                   | Risk | 2.4545  | 0.7976 | 0.0036 | 0.1809 |
| Risk_group | [BP]phosphatidylinositol phosphorylation                                              | Risk | 2.8220  | 0.8322 | 0.0015 | 0.1809 |
| Risk_group | [BP]porphyrin containing compound biosynthetic process                                | Risk | 2.1125  | 0.6800 | 0.0033 | 0.1809 |
| Risk_group | [BP]positive regulation of transcription DNA templated                                | Risk | 2.1514  | 0.7325 | 0.0053 | 0.1809 |
| Risk_group | [BP]pyridoxal phosphate biosynthetic process                                          | Risk | 2.7442  | 0.8908 | 0.0036 | 0.1809 |
| Risk_group | [BP]regulation of pH                                                                  | Risk | 2.0576  | 0.6874 | 0.0046 | 0.1809 |
| Risk_group | [BP]rRNA base methylation                                                             | Risk | 0.3400  | 0.1025 | 0.0019 | 0.1809 |
| Risk_group | [BP]valine biosynthetic process                                                       | Risk | 2.3328  | 0.7413 | 0.0030 | 0.1809 |
| Risk_group | [BP]vitamin B6 biosynthetic process                                                   | Risk | 2.4856  | 0.8158 | 0.0039 | 0.1809 |
| Risk_group | [BP]amino acid transport                                                              | Risk | 1.7043  | 0.6369 | 0.0105 | 0.1909 |
| Risk_group | [BP]branched chain amino acid biosynthetic process                                    | Risk | 1.6925  | 0.6212 | 0.0093 | 0.1909 |
| Risk_group | [BP]branched chain amino acid metabolic process                                       | Risk | 1.5539  | 0.5787 | 0.0103 | 0.1909 |
| Risk_group | [BP]cysteine biosynthetic process from serine                                         | Risk | 2.0424  | 0.7572 | 0.0099 | 0.1909 |
| Risk_group | [BP]dimethylallyl diphosphate biosynthetic process                                    | Risk | 1.7232  | 0.6233 | 0.0084 | 0.1909 |
| Risk_group | [BP]establishment of competence for transformation                                    | Risk | -1.2927 | 0.4788 | 0.0099 | 0.1909 |
| Risk_group | [BP]glutamate biosynthetic process                                                    | Risk | 1.7215  | 0.6534 | 0.0117 | 0.1909 |
| Risk_group | [BP]glycogen biosynthetic process                                                     | Risk | 2.4962  | 0.8908 | 0.0076 | 0.1909 |
| Risk_group | [BP]histidine biosynthetic process                                                    | Risk | 0.8959  | 0.3270 | 0.0089 | 0.1909 |
| Risk_group | [BP]IMP biosynthetic process                                                          | Risk | 0.9589  | 0.3495 | 0.0088 | 0.1909 |
| Risk_group | [BP]isopentenyl diphosphate biosynthetic process methylerythritol 4 phosphate pathway | Risk | 2.2918  | 0.8634 | 0.0111 | 0.1909 |
| Risk_group | [BP]lipoteichoic acid biosynthetic process                                            | Risk | -1.5061 | 0.5574 | 0.0098 | 0.1909 |
| Risk_group | [BP]mRNA catabolic process                                                            | Risk | -0.5238 | 0.1980 | 0.0114 | 0.1909 |
| Risk_group | [BP]positive regulation of translation                                                | Risk | 2.9867  | 1.0652 | 0.0075 | 0.1909 |
| Risk_group | [BP]proline biosynthetic process                                                      | Risk | 1.4834  | 0.5376 | 0.0085 | 0.1909 |
| Risk_group | [BP]proteolysis                                                                       | Risk | 1.3090  | 0.4565 | 0.0064 | 0.1909 |
| Risk_group | [BP]regulation of carbohydrate metabolic process                                      | Risk | -1.2217 | 0.4471 | 0.0091 | 0.1909 |

|            |                                                      |      |         |        |        |        |
|------------|------------------------------------------------------|------|---------|--------|--------|--------|
| Risk_group | [BP]response to redox state                          | Risk | -0.7579 | 0.2878 | 0.0117 | 0.1909 |
| Risk_group | [BP]threonine catabolic process                      | Risk | 1.5691  | 0.5899 | 0.0109 | 0.1909 |
| Risk_group | [BP]tryptophan biosynthetic process                  | Risk | 2.2818  | 0.8441 | 0.0098 | 0.1909 |
| Risk_group | [BP]peptide metabolic process                        | Risk | -0.9063 | 0.3470 | 0.0124 | 0.1973 |
| Risk_group | [BP]isocitrate metabolic process                     | Risk | 0.8451  | 0.3256 | 0.0129 | 0.2030 |
| Risk_group | [BP]chromosome segregation                           | Risk | -0.2760 | 0.1065 | 0.0130 | 0.2036 |
| Risk_group | [BP]DNA methylation                                  | Risk | -0.7668 | 0.3017 | 0.0147 | 0.2060 |
| Risk_group | [BP]response to stress                               | Risk | 0.1873  | 0.0733 | 0.0142 | 0.2060 |
| Risk_group | [BP]tRNA thio modification                           | Risk | -0.7196 | 0.2826 | 0.0145 | 0.2060 |
| Risk_group | [BP]regulation of cell shape                         | Risk | -0.1903 | 0.0754 | 0.0153 | 0.2080 |
| Risk_group | [BP]toxin biosynthetic process                       | Risk | -1.0130 | 0.4009 | 0.0153 | 0.2080 |
| Risk_group | [BP]D tagatose 6 phosphate catabolic process         | Risk | -1.3504 | 0.5396 | 0.0162 | 0.2130 |
| Risk_group | [BP]D gluconate metabolic process                    | Risk | -0.7665 | 0.3074 | 0.0166 | 0.2141 |
| Risk_group | [BP]fructose 6 phosphate metabolic process           | Risk | -0.6805 | 0.2731 | 0.0166 | 0.2141 |
| Risk_group | [BP]barrier septum assembly                          | Risk | -0.2736 | 0.1103 | 0.0171 | 0.2144 |
| Risk_group | [BP] de novo AMP biosynthetic process                | Risk | -0.1648 | 0.0669 | 0.0178 | 0.2150 |
| Risk_group | [BP]modification dependent protein catabolic process | Risk | 1.2533  | 0.5147 | 0.0191 | 0.2150 |
| Risk_group | [BP]proteasomal protein catabolic process            | Risk | 1.3959  | 0.5739 | 0.0192 | 0.2150 |
| Risk_group | [BP]purine nucleobase biosynthetic process           | Risk | 2.5489  | 1.0442 | 0.0188 | 0.2150 |
| Risk_group | [BP]pathogenesis                                     | Risk | -1.3755 | 0.5741 | 0.0210 | 0.2218 |
| Risk_group | [BP]sodium ion transport                             | Risk | -1.5148 | 0.6419 | 0.0229 | 0.2338 |
| Risk_group | [BP]protein polymerization                           | Risk | -0.4209 | 0.1786 | 0.0231 | 0.2347 |
| Risk_group | [BP]lactose metabolic process                        | Risk | -1.1979 | 0.5115 | 0.0239 | 0.2367 |
| Risk_group | [BP]DNA biosynthetic process                         | Risk | -0.3969 | 0.1705 | 0.0247 | 0.2401 |
| Risk_group | [BP]protein dephosphorylation                        | Risk | -0.6103 | 0.2623 | 0.0247 | 0.2401 |
| Risk_group | [BP]selenocysteine biosynthetic process              | Risk | -0.3326 | 0.1431 | 0.0249 | 0.2401 |
| Risk_group | [BP]selenocysteinyl tRNA Sec biosynthetic process    | Risk | -0.3326 | 0.1431 | 0.0249 | 0.2401 |
| Risk_group | [BP]tRNA modification                                | Risk | -0.2908 | 0.1251 | 0.0249 | 0.2401 |
| Risk_group | [BP]septin ring assembly                             | Risk | -1.7383 | 0.7492 | 0.0251 | 0.2403 |
| Risk_group | [BP]seryl tRNA aminoacylation                        | Risk | -0.3317 | 0.1431 | 0.0253 | 0.2404 |

|                             |                                                                    |              |         |        |        |        |
|-----------------------------|--------------------------------------------------------------------|--------------|---------|--------|--------|--------|
| Risk_group                  | [BP]cell wall macromolecule catabolic process                      | Risk         | -0.9346 | 0.4057 | 0.0261 | 0.2441 |
| Risk_group                  | [BP]regulation of nitrogen utilization                             | Risk         | 1.1059  | 0.4814 | 0.0265 | 0.2448 |
| Risk_group                  | [BP]polyamine transport                                            | Risk         | -1.5578 | 0.6837 | 0.0277 | 0.2490 |
| Risk_group                  | [BP]primary metabolic process                                      | Risk         | -0.8922 | 0.3915 | 0.0277 | 0.2490 |
| Risk_group                  | [BP]L asparagine biosynthetic process                              | Risk         | -1.3695 | 0.6042 | 0.0285 | 0.2493 |
| Risk_group                  | [BP]threonine biosynthetic process                                 | Risk         | 2.0741  | 0.9141 | 0.0283 | 0.2493 |
| <b>Cell cycle functions</b> |                                                                    |              |         |        |        |        |
| Delivery                    | [CC]ATP binding cassette ABC transporter complex                   | PTB          | -0.1960 | 0.0645 | 0.0040 | 0.2414 |
| Delivery                    | [CC]cell outer membrane                                            | PTB          | 0.7627  | 0.3222 | 0.0225 | 0.2414 |
| Delivery                    | [CC]GMP reductase complex                                          | PTB          | -1.4567 | 0.5281 | 0.0085 | 0.2414 |
| Delivery                    | [CC]proton transporting ATP synthase complex coupling factor F o   | PTB          | 0.1966  | 0.0830 | 0.0224 | 0.2414 |
| Delivery                    | [CC]proton transporting two sector ATPase complex catalytic domain | PTB          | 0.7260  | 0.2362 | 0.0037 | 0.2414 |
| Delivery                    | [CC]TAT protein transport complex                                  | PTB          | 0.3981  | 0.1634 | 0.0190 | 0.2414 |
| Delivery                    | [CC]tricarboxylic acid cycle enzyme complex                        | PTB          | -1.4512 | 0.5878 | 0.0176 | 0.2414 |
| LLETZ                       | [CC]cell division site                                             | Yes          | 0.5439  | 0.2085 | 0.0124 | 0.2414 |
| LLETZ                       | [CC]exodeoxyribonuclease VII complex                               | Yes          | 0.3106  | 0.1283 | 0.0198 | 0.2414 |
| LLETZ                       | [CC]Holliday junction helicase complex                             | Yes          | 0.1997  | 0.0835 | 0.0212 | 0.2414 |
| Outcome_group               | [CC]TAT protein transport complex                                  | no-risk_PTBP | 1.1453  | 0.4238 | 0.0098 | 0.2414 |
| Outcome_group               | [CC]voltage gated potassium channel complex                        | no-risk_PTBP | 1.9737  | 0.5502 | 0.0008 | 0.2414 |
| Previous_PTBP               | [CC]3 isopropylmalate dehydratase complex                          | Yes          | -1.2840 | 0.4625 | 0.0081 | 0.2414 |
| Previous_PTBP               | [CC]cell division site                                             | Yes          | 0.6188  | 0.2169 | 0.0066 | 0.2414 |
| Previous_PTBP               | [CC]exodeoxyribonuclease VII complex                               | Yes          | 0.4042  | 0.1335 | 0.0041 | 0.2414 |
| Previous_PTBP               | [CC]fatty acid synthase complex                                    | Yes          | -1.3555 | 0.4567 | 0.0049 | 0.2414 |
| Previous_PTBP               | [CC]Holliday junction helicase complex                             | Yes          | 0.2259  | 0.0869 | 0.0127 | 0.2414 |
| Previous_PTBP               | [CC]organelle inner membrane                                       | Yes          | -1.6757 | 0.6350 | 0.0115 | 0.2414 |
| Previous_PTBP               | [CC]primosome complex                                              | Yes          | 0.5271  | 0.2187 | 0.0203 | 0.2414 |

|              |                                           |      |         |        |        |        |
|--------------|-------------------------------------------|------|---------|--------|--------|--------|
| Previous_PTB | [CC]proteasome complex                    | Yes  | -1.1385 | 0.4277 | 0.0109 | 0.2414 |
| Previous_PTB | [CC]protein complex                       | Yes  | 0.4424  | 0.1817 | 0.0191 | 0.2414 |
| Previous_PTB | [CC]tRNA m1A methyltransferase complex    | Yes  | -0.9715 | 0.3637 | 0.0106 | 0.2414 |
| Risk_group   | [CC]3 isopropylmalate dehydratase complex | Risk | 1.2707  | 0.5004 | 0.0148 | 0.2414 |
| Risk_group   | [CC]cell division site                    | Risk | -0.6586 | 0.2346 | 0.0075 | 0.2414 |
| Risk_group   | [CC]cell wall                             | Risk | -1.8267 | 0.7422 | 0.0179 | 0.2414 |
| Risk_group   | [CC]extracellular region                  | Risk | -0.5341 | 0.2166 | 0.0177 | 0.2414 |
| Risk_group   | [CC]fatty acid synthase complex           | Risk | 1.3523  | 0.4941 | 0.0090 | 0.2414 |
| Risk_group   | [CC]organelle inner membrane              | Risk | 1.6735  | 0.6871 | 0.0191 | 0.2414 |
| Risk_group   | [CC]proteasome complex                    | Risk | 1.1282  | 0.4628 | 0.0190 | 0.2414 |
| Risk_group   | [CC]septin ring                           | Risk | -1.7743 | 0.7527 | 0.0230 | 0.2414 |
| Risk_group   | [CC]tRNA m1A methyltransferase complex    | Risk | 1.1807  | 0.3936 | 0.0045 | 0.2414 |

---

Supplementary Table 4 | Microbial sequencing reads from studies using shotgun metagenomics on vaginal samples

| <b>Sample size</b> | <b>Microbial reads</b> | <b>Platform</b> | <b>Author</b>                | <b>Year</b> | <b>Journal</b>      | <b>PMID</b>                                                                 |
|--------------------|------------------------|-----------------|------------------------------|-------------|---------------------|-----------------------------------------------------------------------------|
| 101                | 1,020,000              | HiSeq           | Aliaga Goltsman <i>et al</i> | 2018        | Genome Research     | 30232199                                                                    |
| 47                 | 100,000                | NextSeq         | Lev-Sagie <i>et al</i>       | 2019        | Nature Medicine     | 31591599                                                                    |
| 555                | 100,000                | HiSeq           | Fettweis <i>et al</i>        | 2019        | Nature Medicine     | 31142849                                                                    |
| 19                 | 1,070,000 (median)     | HiSeq           | Ferretti <i>et al</i>        | 2018        | Cell Host & Microbe | 30001516                                                                    |
| 40                 | 39,261                 | HiSeq           | Leiby <i>et al</i>           | 2018        | Microbiome          | 30376898                                                                    |
| 54                 | 208,225                | NextSeq         | Oliver <i>et al</i>          | 2019        | bioRxiv             | <a href="https://doi.org/10.1101/840520">https://doi.org/10.1101/840520</a> |



Supplementary Table 5 | Top 50 taxonomic composition of control samples

| Taxon                           | Water1 | Water2 |
|---------------------------------|--------|--------|
| unclassified                    | 5.46   | 27.97  |
| Cutibacterium acnes             | 2.58   | 16.04  |
| Actinomyces sp000195595         | 0      | 1.73   |
| Gordonia jacobaea               | 0.01   | 0.83   |
| Rothia dentocariosa             | 0.02   | 0.77   |
| Staphylococcus epidermidis      | 0.07   | 0.71   |
| Cutibacterium namnetense        | 0.01   | 0.65   |
| Pseudomonas_E putida            | 0      | 0.6    |
| Bifidobacterium animalis        | 0.02   | 0.48   |
| Peptoniphilus_A harei_A         | 0      | 0.48   |
| Cutibacterium humerusii         | 0.09   | 0.46   |
| Corynebacterium kefirresidentii | 0.07   | 0.42   |
| Acinetobacter johnsonii         | 0.01   | 0.42   |
| Prevotella disiens              | 0      | 0.42   |
| Rothia mucilaginoso             | 0      | 0.42   |
| Finegoldia magna_H              | 0.01   | 0.4    |
| Lawsonella clevelandensis_A     | 0      | 0.4    |
| Actinomyces oris_A              | 0      | 0.33   |
| Pseudomonas_E sp001320045       | 0      | 0.33   |
| Streptococcus gordonii          | 0      | 0.33   |
| Lactobacillus gasseri           | 0.02   | 0.31   |
| Stenotrophomonas bentonitica    | 0.01   | 0.31   |
| Micrococcus luteus              | 0.01   | 0.29   |
| Rothia sp001808955              | 0      | 0.29   |
| Kocuria rhizophila_B            | 0      | 0.27   |
| Escherichia flexneri            | 0.37   | 0.25   |
| Xanthomonas campestris          | 0      | 0.25   |
| Cutibacterium granulorum        | 0.02   | 0.23   |
| Prevotella corporis             | 0      | 0.23   |
| Lactococcus lactis_E            | 0      | 0.21   |
| Varibaculum sp900106855         | 0      | 0.21   |
| Corynebacterium otitidis        | 0.02   | 0.19   |
| Diaphorobacter sp003248855      | 0.01   | 0.19   |
| Pseudomonas_E putida_H          | 0      | 0.19   |
| Streptococcus oralis            | 0      | 0.19   |
| Anaerococcus sp900258475        | 0      | 0.17   |
| Finegoldia magna                | 0      | 0.17   |
| Thermus scotoductus             | 0      | 0.17   |
| Mycolicobacterium neumannii     | 0      | 0.15   |
| Actinomyces viscosus            | 0.01   | 0.13   |
| Ezakiella coagulans             | 0.01   | 0.13   |
| Acinetobacter ursingii          | 0      | 0.13   |
| Peptoniphilus_C coxii           | 0      | 0.13   |
| Prevotella colorans             | 0      | 0.13   |
| Streptococcus anginosus         | 0      | 0.13   |

|                            |      |      |
|----------------------------|------|------|
| Streptococcus oralis_S     | 0    | 0.13 |
| Staphylococcus auricularis | 0.03 | 0.1  |
| Staphylococcus capitis     | 0.03 | 0.1  |
| Ralstonia pickettii        | 0.02 | 0.1  |
| Pseudomonas_E lactis       | 0.01 | 0.1  |

---

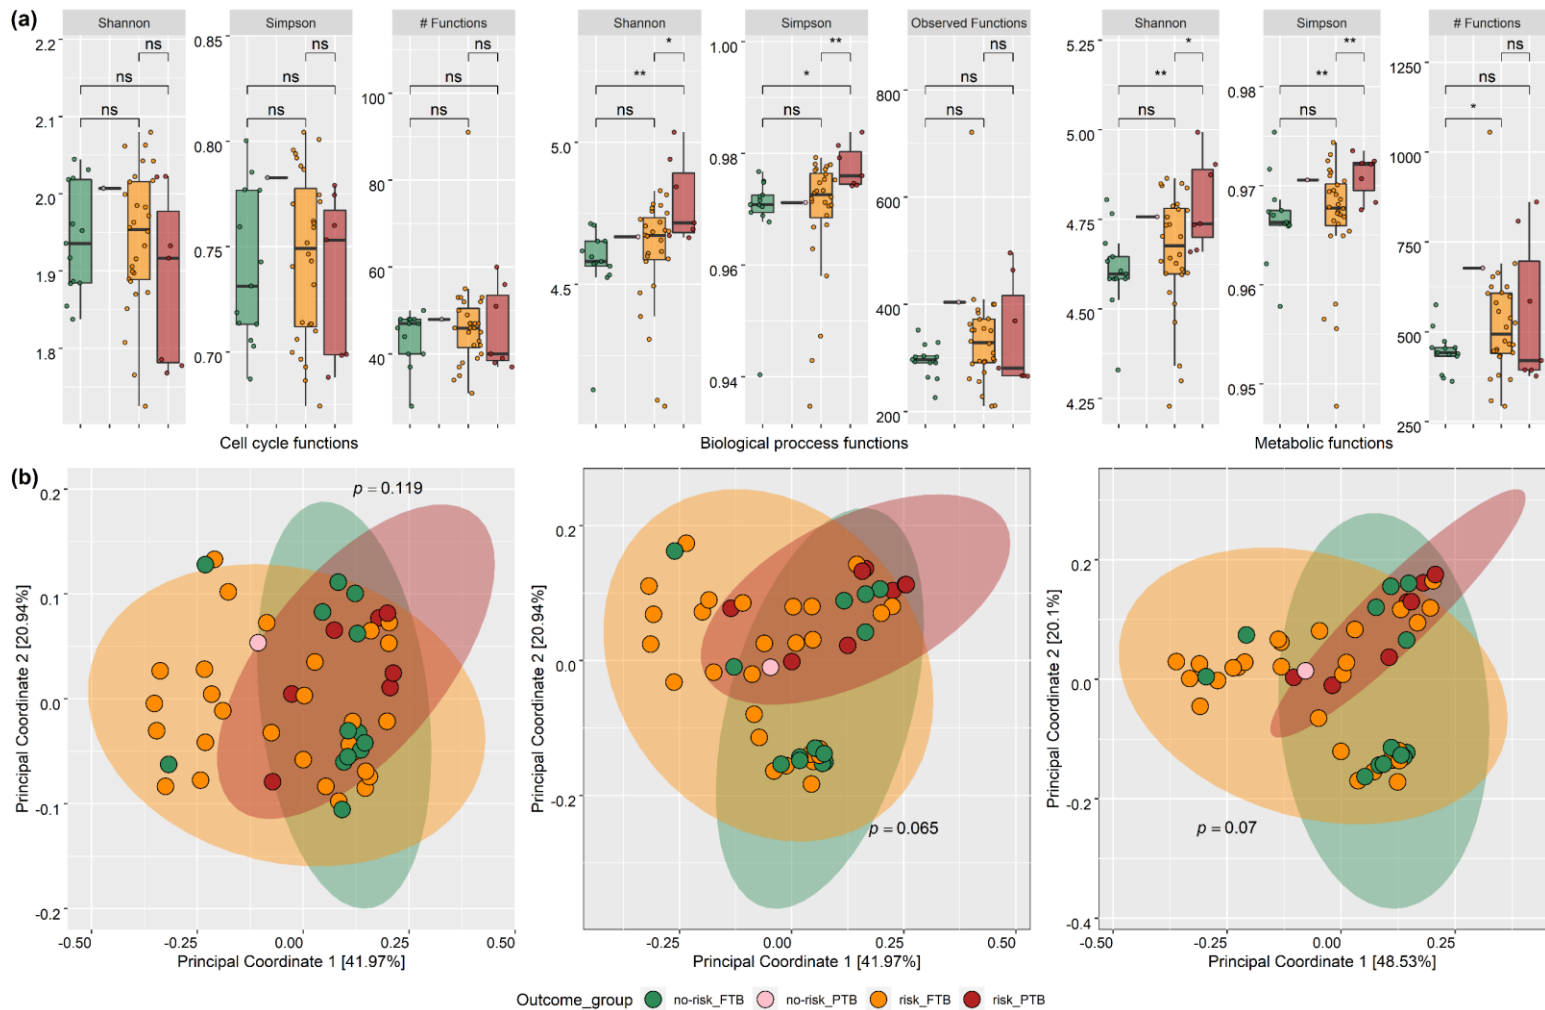

**Supplementary Figure 1 | Functional diversity of the vaginal microbiome by outcome groups.** Gene functions are divided into 3 higher level functional categories based on gene ontology classification with both alpha (a) and (b) beta diversity measures of identified content shown. Significant differences are highlighted by an asterisk where p value was < 0.05 as calculated by Kruskal-Wallis. Significant differences in beta diversity were determined by PERMANOVA analysis.
